# Supplementary material for: Experimental and computational study of BF3-catalyzed transformations of ortho-(pivaloylaminomethyl)benzaldehydes: an unexpected difference from TFA catalysis
Source: Royal Society of Chemistry journal article supplement (doi:10.1039/d1ob02308j), 2022-01-01
Supplement: d1ob02308j1.pdf [file d1ob02308j1.pdf]

**Coordinates of the computed structures**

**11A**

|   |             |             |             |
|---|-------------|-------------|-------------|
| C | -3.16535100 | -1.12457600 | 0.39051400  |
| C | -2.24634000 | -1.48400500 | -0.59161200 |
| C | -2.01312500 | -2.82238500 | -0.89991600 |
| C | -2.72603800 | -3.79893100 | -0.20225000 |
| C | -3.65168900 | -3.43853200 | 0.78217500  |
| C | -3.87887300 | -2.09616800 | 1.08790900  |
| C | -3.24000600 | 0.37109200  | 0.53413400  |
| C | -1.61299900 | -0.25314800 | -1.18547300 |
| H | -1.30426100 | -3.10355200 | -1.67377600 |
| H | -2.56491800 | -4.84710300 | -0.43018200 |
| H | -4.19923700 | -4.21122700 | 1.31114300  |
| H | -4.59929100 | -1.81661900 | 1.85061000  |
| H | -2.86752200 | 0.69326400  | 1.51215600  |
| N | -2.36686900 | 0.83584500  | -0.55286900 |
| C | -2.21606400 | 2.08778900  | -1.06913100 |
| O | -1.44847800 | 2.24209200  | -2.02371000 |
| C | -3.02181000 | 3.27972300  | -0.51932800 |
| C | -3.08509900 | 3.33291700  | 1.01657700  |
| C | -2.34161300 | 4.56321600  | -1.01231200 |
| C | -4.43753300 | 3.21162700  | -1.11846900 |
| H | -3.83762900 | 2.66428600  | 1.43520500  |
| H | -2.11562500 | 3.09821500  | 1.46698700  |
| H | -3.35661200 | 4.34918500  | 1.31641000  |
| H | -2.25939900 | 4.58022700  | -2.09971800 |
| H | -2.93375500 | 5.42456300  | -0.69008300 |
| H | -1.33581700 | 4.66014300  | -0.59330200 |
| H | -5.01851900 | 4.07147500  | -0.77002400 |
| H | -4.39698500 | 3.24806300  | -2.21125500 |
| H | -4.97268200 | 2.30443900  | -0.82494400 |
| C | 0.70756300  | -0.95136200 | -1.97293100 |
| C | 1.55701200  | -1.84362800 | -1.30585200 |
| C | 2.42335800  | -2.70445700 | -1.98538800 |
| C | 2.40421900  | -2.65677400 | -3.37241100 |
| C | 1.54804200  | -1.76999200 | -4.04593400 |
| C | 0.68960900  | -0.90888400 | -3.36084600 |
| C | -0.07671800 | -0.16298800 | -0.97041100 |
| C | 1.34048700  | -1.65931700 | 0.09967600  |
| H | 3.08253100  | -3.37601600 | -1.44635200 |
| H | 3.05658500  | -3.30474600 | -3.94631700 |
| H | 1.55945900  | -1.75085000 | -5.13054100 |
| H | 0.04469500  | -0.22233500 | -3.89869800 |
| H | 1.83352200  | -2.18328100 | 0.90251200  |
| N | 0.39650200  | -0.76957900 | 0.30238800  |
| C | -0.00082600 | -0.20786900 | 1.57521000  |
| O | -0.39313800 | 0.93001400  | 1.54935100  |
| C | 0.05486400  | -1.07095100 | 2.83493300  |
| C | -0.93415000 | -0.44863300 | 3.83080300  |
| C | -0.37374800 | -2.52230500 | 2.56796500  |
| C | 1.47381000  | -0.99875200 | 3.43218200  |
| H | -0.68520800 | 0.59168300  | 4.04618700  |
| H | -1.95729000 | -0.48981700 | 3.44277500  |
| H | -0.89640500 | -1.01834200 | 4.76250600  |
| H | 0.36204200  | -3.10287900 | 2.00995100  |

|   |             |             |             |
|---|-------------|-------------|-------------|
| H | -0.51205700 | -3.01864000 | 3.53225700  |
| H | -1.32551700 | -2.56071000 | 2.02933900  |
| H | 1.47828300  | -1.56693100 | 4.36678500  |
| H | 2.24052200  | -1.40849900 | 2.77284100  |
| H | 1.74469400  | 0.03711100  | 3.65479100  |
| H | -1.75372600 | -0.19244600 | -2.26950700 |
| H | 0.24288500  | 0.88292000  | -0.96869700 |
| H | -4.26138600 | 0.73825300  | 0.41049600  |
| C | 3.37435800  | 0.71562100  | 0.22140000  |
| O | 2.52707600  | 1.20153300  | -0.53930700 |
| O | 3.41512300  | -0.39258200 | 0.79971400  |
| C | 4.61144800  | 1.61058100  | 0.54139700  |
| F | 5.76670100  | 0.99388700  | 0.21407100  |
| F | 4.60565500  | 2.78829300  | -0.10024000 |
| F | 4.68540100  | 1.88719900  | 1.86170000  |

**TS1A**

|   |             |             |             |
|---|-------------|-------------|-------------|
| C | 3.20648000  | 0.28590300  | -0.68928000 |
| C | 2.72450200  | -0.56017600 | 0.30415300  |
| C | 3.21558100  | -1.85419400 | 0.45044500  |
| C | 4.21706500  | -2.28680600 | -0.41936000 |
| C | 4.70370200  | -1.43845600 | -1.42015000 |
| C | 4.19923300  | -0.14520000 | -1.56610000 |
| C | 2.51173300  | 1.62002100  | -0.63649300 |
| C | 1.65026800  | 0.13043000  | 1.10717400  |
| H | 2.83262800  | -2.51242300 | 1.22521600  |
| H | 4.62200600  | -3.28799900 | -0.31886400 |
| H | 5.48217600  | -1.78680900 | -2.09057000 |
| H | 4.58069000  | 0.51203000  | -2.34125700 |
| H | 1.91295700  | 1.78548700  | -1.53743400 |
| N | 1.66545000  | 1.49301100  | 0.56098600  |
| C | 1.04552200  | 2.46585700  | 1.28529300  |
| O | 0.52749300  | 2.16297100  | 2.36427800  |
| C | 1.00678600  | 3.92595400  | 0.79503300  |
| C | 0.80367300  | 4.07137900  | -0.72220900 |
| C | -0.17038000 | 4.61207300  | 1.50049100  |
| C | 2.31392000  | 4.60739500  | 1.23542200  |
| H | 1.72784700  | 3.95742700  | -1.28994800 |
| H | 0.06831200  | 3.35401900  | -1.09977500 |
| H | 0.42645100  | 5.07760100  | -0.92721500 |
| H | -0.07849200 | 4.54637300  | 2.58512600  |
| H | -0.19305900 | 5.66638700  | 1.21049500  |
| H | -1.11988200 | 4.15234600  | 1.21032200  |
| H | 2.30012400  | 5.65419500  | 0.91575500  |
| H | 2.41678400  | 4.58166100  | 2.32423800  |
| H | 3.19626000  | 4.13347000  | 0.79654000  |
| C | -0.04622700 | -1.57065700 | 2.07229500  |
| C | -0.74062600 | -2.63678300 | 1.46837000  |
| C | -1.27266000 | -3.69959500 | 2.21629400  |
| C | -1.06143100 | -3.68054400 | 3.58264600  |
| C | -0.34544100 | -2.62536300 | 4.18811600  |
| C | 0.16376200  | -1.56223900 | 3.45367600  |
| C | 0.30428300  | -0.58583900 | 1.03963800  |
| C | -0.73847400 | -2.38379700 | 0.06717700  |
| H | -1.82125000 | -4.50151100 | 1.73472100  |
| H | -1.44771600 | -4.48214200 | 4.20170700  |
| H | -0.19707100 | -2.64409700 | 5.26267000  |

|               |             |             |             |             |             |             |             |
|---------------|-------------|-------------|-------------|-------------|-------------|-------------|-------------|
| H             | 0.68684700  | -0.74519100 | 3.93898400  | H           | 0.40436700  | 5.15197900  | 0.97157000  |
| H             | -1.21231300 | -2.96676000 | -0.70983700 | H           | 1.93125800  | 4.71913400  | 0.17840800  |
| N             | -0.06540200 | -1.27463500 | -0.19224400 | C           | -0.84242400 | -0.66538400 | 1.94523500  |
| C             | -0.06111400 | -0.59428300 | -1.47944800 | C           | -1.59708700 | -1.79401100 | 1.46203000  |
| O             | -0.19214900 | 0.60018000  | -1.45724400 | C           | -2.77550500 | -2.22131200 | 2.15270200  |
| C             | 0.16276200  | -1.40920600 | -2.75432400 | C           | -3.15160400 | -1.54177600 | 3.27466000  |
| C             | 0.81105900  | -0.44929600 | -3.76315400 | C           | -2.39368800 | -0.41885400 | 3.76332100  |
| C             | 1.10318700  | -2.59775100 | -2.52278000 | C           | -1.26862400 | 0.01945600  | 3.12670100  |
| C             | -1.19097200 | -1.87436200 | -3.32252700 | C           | 0.21550500  | -0.44771900 | 1.07468800  |
| H             | 0.14950200  | 0.38684600  | -3.99733100 | C           | -0.95606500 | -2.24818000 | 0.32560000  |
| H             | 1.75392700  | -0.04858700 | -3.37741700 | H           | -3.35295900 | -3.06321500 | 1.78405300  |
| H             | 1.02075800  | -0.99933600 | -4.68386300 | H           | -4.04182700 | -1.84232200 | 3.81711300  |
| H             | 0.66774900  | -3.37453800 | -1.89039500 | H           | -2.74079300 | 0.09153400  | 4.65573500  |
| H             | 1.33128900  | -3.05071500 | -3.49136500 | H           | -0.72198900 | 0.88255700  | 3.49138900  |
| H             | 2.04393500  | -2.27083300 | -2.06998900 | H           | -1.94619600 | 1.72296000  | 0.64618900  |
| H             | -1.01438200 | -2.26724500 | -4.32839600 | N           | 0.14434500  | -1.44515200 | 0.10463100  |
| H             | -1.65425000 | -2.66312700 | -2.72871300 | C           | 0.99120000  | -1.51846800 | -1.04611400 |
| H             | -1.89792500 | -1.04388100 | -3.39006300 | O           | 1.51400300  | -0.50077100 | -1.42872600 |
| H             | 1.90726100  | 0.17024500  | 2.17021800  | C           | 1.24963600  | -2.87249600 | -1.72146200 |
| H             | -0.82176400 | 0.36374800  | 1.14318200  | C           | 2.55464600  | -2.71309100 | -2.51635300 |
| H             | 3.22463200  | 2.44180700  | -0.53391300 | C           | 1.44486600  | -4.00213900 | -0.69925600 |
| C             | -3.10999500 | 0.01962800  | -0.19644300 | C           | 0.11680000  | -3.19071300 | -2.71705500 |
| O             | -2.49524500 | 0.55918700  | 0.74588000  | H           | 2.46593300  | -1.93841800 | -3.27997700 |
| O             | -2.91417300 | -1.05779600 | -0.77955100 | H           | 3.38683300  | -2.45004900 | -1.85588400 |
| C             | -4.33662100 | 0.81586500  | -0.73215600 | H           | 2.78687400  | -3.66224200 | -3.00642000 |
| F             | -5.45540100 | 0.06271000  | -0.68919200 | H           | 0.52956100  | -4.27902800 | -0.17616600 |
| F             | -4.59295500 | 1.93518500  | -0.04016100 | H           | 1.80716200  | -4.88904200 | -1.22682000 |
| F             | -4.16489500 | 1.18175200  | -2.01861800 | H           | 2.19612700  | -3.72432100 | 0.04717800  |
| <b>16+TFA</b> |             |             |             | H           | 0.40992300  | -4.06366000 | -3.30794300 |
| C             | 3.45715300  | 0.83909300  | 0.27761200  | H           | -0.83293800 | -3.42363500 | -2.23359600 |
| C             | 2.71327900  | 0.07651400  | 1.16931700  | H           | -0.04403000 | -2.35345000 | -3.40257700 |
| C             | 3.27914100  | -1.00007400 | 1.84252400  | H           | 1.10900800  | 0.99755300  | 2.25423300  |
| C             | 4.62508900  | -1.29436900 | 1.61311600  | H           | 2.99186500  | 2.89386100  | -0.23583900 |
| C             | 5.37838100  | -0.52210200 | 0.72381000  | H           | -1.21559800 | -3.05035200 | -0.34181400 |
| C             | 4.79796100  | 0.55143700  | 0.04511100  | C           | -2.43686100 | 0.55608500  | -0.78011800 |
| C             | 2.60135100  | 1.88351700  | -0.38172800 | O           | -1.40057100 | 0.61882600  | -1.40058300 |
| C             | 1.29454400  | 0.58110200  | 1.25794800  | O           | -2.76934500 | 1.19517200  | 0.30410200  |
| H             | 2.68629900  | -1.60088700 | 2.52649100  | C           | -3.60240800 | -0.31089300 | -1.30538400 |
| H             | 5.09036000  | -2.12828500 | 2.12772100  | F           | -4.27784900 | -0.91462700 | -0.32365200 |
| H             | 6.42237000  | -0.76330000 | 0.55396800  | F           | -3.16088900 | -1.24892600 | -2.14606900 |
| H             | 5.38022600  | 1.14074800  | -0.65649900 | F           | -4.47214800 | 0.46495700  | -1.97787800 |
| H             | 2.51028400  | 1.67981800  | -1.44870000 | <b>TS2A</b> |             |             |             |
| N             | 1.30385100  | 1.72353900  | 0.30107600  | C           | 3.45992300  | 0.66332900  | -0.78373900 |
| C             | 0.24764300  | 2.54064900  | 0.27172200  | C           | 3.05720900  | -0.09144700 | 0.31177400  |
| O             | -0.68380700 | 2.34175000  | 1.09363000  | C           | 3.73219400  | -1.25048900 | 0.67817200  |
| C             | 0.15509400  | 3.74594200  | -0.67817900 | C           | 4.83915400  | -1.64014900 | -0.07980500 |
| C             | 0.73719100  | 3.49416000  | -2.07779600 | C           | 5.25115000  | -0.87922800 | -1.17747100 |
| C             | -1.33002800 | 4.10148300  | -0.84345100 | C           | 4.56242400  | 0.28029500  | -1.53971800 |
| C             | 0.87062100  | 4.92354400  | 0.00881000  | C           | 2.52301900  | 1.81221400  | -1.02248400 |
| H             | 1.82147300  | 3.60082300  | -2.11328300 | C           | 1.84466400  | 0.53489500  | 0.95801800  |
| H             | 0.46321700  | 2.50184500  | -2.44928700 | H           | 3.40672600  | -1.84221800 | 1.52928800  |
| H             | 0.32029200  | 4.23625400  | -2.76427400 | H           | 5.38313700  | -2.54049800 | 0.18496000  |
| H             | -1.81472800 | 4.27736600  | 0.11778700  | H           | 6.11091600  | -1.19635700 | -1.75791100 |
| H             | -1.40730300 | 5.01159000  | -1.44451600 | H           | 4.87339100  | 0.86145600  | -2.40214800 |
| H             | -1.86762500 | 3.30438200  | -1.36702000 | H           | 2.02373700  | 1.69753600  | -1.98613200 |
| H             | 0.79607400  | 5.81022000  | -0.62821500 | N           | 1.56957200  | 1.69485400  | 0.09323000  |

|            |             |             |             |   |             |             |             |
|------------|-------------|-------------|-------------|---|-------------|-------------|-------------|
| C          | 0.61573300  | 2.57077900  | 0.51152700  | C | 3.08225100  | 0.00678400  | 0.21225000  |
| O          | 0.00823500  | 2.31869200  | 1.55562600  | C | 3.81331000  | -1.15409300 | 0.43239300  |
| C          | 0.32698000  | 3.87312100  | -0.25915300 | C | 4.90829800  | -1.40972600 | -0.39430300 |
| C          | 0.34286400  | 3.72165800  | -1.78939500 | C | 5.24946500  | -0.51514600 | -1.41257100 |
| C          | -1.06902200 | 4.35183700  | 0.15933100  | C | 4.50664500  | 0.64879100  | -1.62379300 |
| C          | 1.36273900  | 4.91913400  | 0.18826800  | C | 2.44970600  | 2.05462800  | -0.83880700 |
| H          | 1.35031700  | 3.72912700  | -2.20641300 | C | 1.88298900  | 0.50945000  | 0.97469800  |
| H          | -0.16518100 | 2.80694400  | -2.11037900 | H | 3.54118500  | -1.84673500 | 1.22376800  |
| H          | -0.19089500 | 4.56998300  | -2.22753200 | H | 5.49633000  | -2.30904100 | -0.24569700 |
| H          | -1.13966900 | 4.48317500  | 1.23972500  | H | 6.10279000  | -0.72911500 | -2.04730600 |
| H          | -1.27600800 | 5.30961500  | -0.32655400 | H | 4.77423600  | 1.33638300  | -2.41980100 |
| H          | -1.83701400 | 3.63588900  | -0.14913400 | H | 1.91334700  | 2.06858900  | -1.78831500 |
| H          | 1.15513100  | 5.86939900  | -0.31396700 | N | 1.54314700  | 1.75461400  | 0.28219600  |
| H          | 1.30587100  | 5.08462100  | 1.26838300  | C | 0.44946500  | 2.41774500  | 0.74251900  |
| H          | 2.38603800  | 4.62536300  | -0.06175400 | O | -0.19316400 | 1.89309300  | 1.65806100  |
| C          | 0.08910400  | -0.60299300 | 2.48477600  | C | 0.06408300  | 3.80328000  | 0.20138800  |
| C          | -0.86149600 | -1.64008400 | 2.36508900  | C | 0.03173900  | 3.86992900  | -1.33478500 |
| C          | -1.62478100 | -2.03898000 | 3.47946500  | C | -1.33653300 | 4.13387500  | 0.72946200  |
| C          | -1.39796600 | -1.39667200 | 4.67904000  | C | 1.06542600  | 4.82646000  | 0.76521900  |
| C          | -0.44727000 | -0.34850600 | 4.79789600  | H | 1.02234600  | 3.99768200  | -1.77272400 |
| C          | 0.29210400  | 0.06373600  | 3.71368700  | H | -0.43720400 | 2.98039900  | -1.76725400 |
| C          | 0.69713500  | -0.42610000 | 1.21082400  | H | -0.56288300 | 4.73887300  | -1.63093200 |
| C          | -0.90573200 | -2.05508000 | 0.98809900  | H | -1.37226500 | 4.09540300  | 1.81927600  |
| H          | -2.36563100 | -2.82655700 | 3.39455100  | H | -1.60884400 | 5.14189900  | 0.40417700  |
| H          | -1.96479100 | -1.68930300 | 5.55693800  | H | -2.07888500 | 3.43199700  | 0.33936700  |
| H          | -0.31660000 | 0.13885900  | 5.75751600  | H | 0.79006200  | 5.82765500  | 0.41925600  |
| H          | 0.99383300  | 0.88605900  | 3.79512700  | H | 1.04709800  | 4.82704700  | 1.85934600  |
| H          | -2.07744400 | -1.58052800 | 0.51696300  | H | 2.08943600  | 4.62828000  | 0.43758600  |
| N          | 0.16323200  | -1.32159500 | 0.36392100  | C | 0.30535800  | -0.95727400 | 2.42807800  |
| C          | 0.51733800  | -1.42972900 | -1.04465300 | C | -0.59888500 | -2.00441100 | 2.22834100  |
| O          | 0.92446300  | -0.44208900 | -1.59101200 | C | -1.23883900 | -2.61214500 | 3.30324200  |
| C          | 0.43616100  | -2.79496500 | -1.72954600 | C | -0.94167700 | -2.14263900 | 4.57935100  |
| C          | 1.19402200  | -2.65712500 | -3.05635700 | C | -0.03096800 | -1.09109200 | 4.78314800  |
| C          | 1.14084000  | -3.86843000 | -0.88457600 | C | 0.60156200  | -0.48048000 | 3.71140100  |
| C          | -1.02279600 | -3.17370900 | -2.05133100 | C | 0.77551800  | -0.52451200 | 1.12695900  |
| H          | 0.73050500  | -1.90947800 | -3.70306000 | C | -0.68943400 | -2.28614700 | 0.77222200  |
| H          | 2.23573200  | -2.36853400 | -2.88791400 | H | -1.94836700 | -3.41800700 | 3.15374100  |
| H          | 1.17814100  | -3.62119100 | -3.57104300 | H | -1.42583900 | -2.59492000 | 5.43828600  |
| H          | 0.64395000  | -4.08047400 | 0.06227900  | H | 0.16907900  | -0.74869500 | 5.79201300  |
| H          | 1.16902800  | -4.79764600 | -1.46082600 | H | 1.28687700  | 0.34377600  | 3.86987100  |
| H          | 2.17328400  | -3.57352800 | -0.67040500 | H | -1.69364900 | -2.15166500 | 0.34939700  |
| H          | -1.00949500 | -4.08239500 | -2.66025600 | N | 0.22645400  | -1.28229300 | 0.19287500  |
| H          | -1.62836200 | -3.37642100 | -1.16827600 | C | 0.43490200  | -1.12512600 | -1.25231700 |
| H          | -1.50680200 | -2.38058600 | -2.62734400 | O | 0.75123100  | -0.03657400 | -1.63851200 |
| H          | 2.10013300  | 0.90523800  | 1.95748600  | C | 0.41773900  | -2.37028400 | -2.14117800 |
| H          | 3.04312000  | 2.77367600  | -0.99841000 | C | 0.75432300  | -1.88840300 | -3.55785800 |
| H          | -0.96655400 | -3.10918900 | 0.74216000  | C | 1.54519600  | -3.29943800 | -1.65207500 |
| C          | -3.08500500 | -0.37077700 | -0.86105700 | C | -0.93037300 | -3.11188300 | -2.19716400 |
| O          | -2.06998000 | -0.01131000 | -1.43424900 | H | -0.02278500 | -1.22105600 | -3.93927800 |
| O          | -3.21750500 | -1.18701000 | 0.11395500  | H | 1.70841700  | -1.35717000 | -3.58483100 |
| C          | -4.44350400 | 0.22977300  | -1.30643000 | H | 0.81898700  | -2.75842500 | -4.21590200 |
| F          | -4.86859200 | 1.13845000  | -0.40931500 | H | 1.39221200  | -3.65657900 | -0.63022600 |
| F          | -5.39893200 | -0.70905000 | -1.39882900 | H | 1.58434200  | -4.17377800 | -2.30807800 |
| F          | -4.36280800 | 0.83960300  | -2.49319400 | H | 2.51401200  | -2.79212700 | -1.69887400 |
| <b>17A</b> |             |             |             | H | -0.88717000 | -3.80535600 | -3.04174400 |
| C          | 3.41617100  | 0.90262100  | -0.79760600 | H | -1.13975200 | -3.70390900 | -1.30740900 |

|                            |             |             |             |             |             |             |             |
|----------------------------|-------------|-------------|-------------|-------------|-------------|-------------|-------------|
| H                          | -1.75653600 | -2.41646200 | -2.35356600 | O           | 0.49939600  | -1.39209900 | 1.07554500  |
| H                          | 2.15863500  | 0.75148100  | 2.00642200  | C           | 2.41078800  | -1.42834800 | 2.55321900  |
| H                          | 2.95210800  | 3.01527700  | -0.69319500 | C           | 2.48240600  | -2.93216700 | 2.25401600  |
| H                          | -0.32362300 | -3.28906900 | 0.53998200  | C           | 3.81982000  | -0.83075600 | 2.49464500  |
| C                          | -3.27971300 | -0.66955400 | -0.86367700 | C           | 1.78358400  | -1.21428000 | 3.94780400  |
| O                          | -2.14418600 | -0.28965100 | -1.19888500 | H           | 1.49867600  | -3.39999500 | 2.32304100  |
| O                          | -3.66434300 | -1.74897800 | -0.37570600 | H           | 2.88575600  | -3.10932400 | 1.25165500  |
| C                          | -4.43196200 | 0.36261600  | -1.06456000 | H           | 3.14680200  | -3.40274200 | 2.98310800  |
| F                          | -5.42574100 | -0.14614100 | -1.82370400 | H           | 3.85042100  | 0.23225600  | 2.73939100  |
| F                          | -4.04488000 | 1.50469000  | -1.65456300 | H           | 4.43926800  | -1.35154100 | 3.22977100  |
| F                          | -4.98957600 | 0.70534300  | 0.11689100  | H           | 4.27229200  | -0.97682000 | 1.51150200  |
| <b>17A--H<sub>2</sub>O</b> |             |             |             | H           | 2.39858900  | -1.74460700 | 4.68029300  |
| C                          | 1.86970200  | -2.18739300 | -1.57878500 | H           | 1.75271500  | -0.16046500 | 4.23465900  |
| C                          | 2.63419100  | -1.05836500 | -1.30056300 | H           | 0.76947100  | -1.62008400 | 3.98702700  |
| C                          | 4.00473500  | -1.14688600 | -1.08071000 | H           | 2.11833300  | 0.85319200  | -2.16088500 |
| C                          | 4.60388500  | -2.40645200 | -1.13665000 | H           | 0.07917800  | -2.15562800 | -2.77726600 |
| C                          | 3.83870800  | -3.54352300 | -1.41248400 | H           | 2.33745400  | 1.55615100  | 2.88878300  |
| C                          | 2.46428800  | -3.44400100 | -1.63526900 | O           | -1.08738300 | 1.07031600  | 0.66875400  |
| C                          | 0.42895700  | -1.82196100 | -1.79722200 | H           | -2.05424300 | 1.22052200  | 0.73176400  |
| C                          | 1.77374600  | 0.17991400  | -1.36960000 | C           | -3.98028100 | -0.16576500 | 1.19479700  |
| H                          | 4.59635100  | -0.25931500 | -0.87598300 | O           | -3.84757200 | 1.02712900  | 0.84102300  |
| H                          | 5.67137800  | -2.50257800 | -0.97036600 | O           | -3.13968400 | -1.00512100 | 1.54663800  |
| H                          | 4.31987200  | -4.51474900 | -1.45755300 | H           | -1.02959800 | 0.11184400  | 0.79537700  |
| H                          | 1.87414700  | -4.32806200 | -1.85436400 | C           | -5.46270800 | -0.64715400 | 1.15525300  |
| H                          | -0.20999600 | -2.25677100 | -1.02564000 | F           | -5.63159100 | -1.90564700 | 1.59046400  |
| N                          | 0.45005700  | -0.34971500 | -1.72094600 | F           | -5.95521100 | -0.60254300 | -0.10203100 |
| C                          | -0.45415200 | 0.54636000  | -2.23201900 | F           | -6.26308600 | 0.13508200  | 1.90904800  |
| O                          | -0.11204200 | 1.72174800  | -2.34129200 | <b>TS3A</b> |             |             |             |
| C                          | -1.84776800 | 0.09238700  | -2.69996400 | C           | -1.67342500 | 0.05305500  | 2.60557300  |
| C                          | -2.45905600 | -1.04928100 | -1.87362500 | C           | -1.82590500 | -0.97957500 | 1.68553700  |
| C                          | -2.77818900 | 1.30824700  | -2.59286900 | C           | -1.95379100 | -2.30298100 | 2.09002100  |
| C                          | -1.72742900 | -0.31613900 | -4.17935200 | C           | -1.92059400 | -2.58295000 | 3.45717100  |
| H                          | -2.09630000 | -2.03352100 | -2.17298500 | C           | -1.75057000 | -1.55216800 | 4.38585100  |
| H                          | -2.28161500 | -0.91576300 | -0.80225200 | C           | -1.62324100 | -0.22486700 | 3.96838400  |
| H                          | -3.54225100 | -1.04686500 | -2.02966900 | C           | -1.59439500 | 1.38246900  | 1.90350500  |
| H                          | -2.38941800 | 2.15911500  | -3.15401800 | C           | -1.88382600 | -0.41594800 | 0.28696600  |
| H                          | -3.75966200 | 1.03794100  | -2.99390500 | H           | -2.07860400 | -3.10002700 | 1.36230900  |
| H                          | -2.90594500 | 1.60453900  | -1.54758900 | H           | -2.02319600 | -3.60657000 | 3.80123600  |
| H                          | -2.71331200 | -0.61203700 | -4.55160700 | H           | -1.72312000 | -1.78494700 | 5.44514800  |
| H                          | -1.36896800 | 0.52089800  | -4.78583400 | H           | -1.49813600 | 0.57147500  | 4.69531600  |
| H                          | -1.04823900 | -1.16208600 | -4.32201200 | H           | -0.60504700 | 1.83038900  | 2.01231900  |
| C                          | 1.84639900  | 2.47092000  | -0.06984900 | N           | -1.87951500 | 1.02648400  | 0.49726000  |
| C                          | 1.74281300  | 2.87056700  | 1.26828200  | C           | -2.60358200 | 1.77731200  | -0.39707600 |
| C                          | 1.80478600  | 4.21200600  | 1.62135300  | O           | -3.22326300 | 1.22222600  | -1.30214300 |
| C                          | 1.98620300  | 5.13890600  | 0.59695000  | C           | -2.60961200 | 3.31456900  | -0.29038000 |
| C                          | 2.09833900  | 4.74103100  | -0.74530300 | C           | -1.32416200 | 3.89959200  | 0.31482000  |
| C                          | 2.02405900  | 3.40214200  | -1.10017600 | C           | -2.75421000 | 3.85732400  | -1.72079700 |
| C                          | 1.74367900  | 1.02695300  | -0.10497700 | C           | -3.84395900 | 3.74459800  | 0.52142100  |
| C                          | 1.57257200  | 1.66054600  | 2.11870400  | H           | -1.30969400 | 3.85914400  | 1.40468300  |
| H                          | 1.71745700  | 4.52927300  | 2.65430300  | H           | -0.43197300 | 3.39103700  | -0.06586900 |
| H                          | 2.04059700  | 6.19468700  | 0.84028400  | H           | -1.25402200 | 4.95460400  | 0.03404500  |
| H                          | 2.23278300  | 5.49363000  | -1.51349400 | H           | -3.65108500 | 3.46773800  | -2.20390800 |
| H                          | 2.07588300  | 3.09267900  | -2.13633400 | H           | -2.81931600 | 4.94853600  | -1.68279400 |
| H                          | 0.57641000  | 1.60611000  | 2.57178000  | H           | -1.88806900 | 3.58635300  | -2.33229300 |
| N                          | 1.66785600  | 0.57006200  | 1.12577300  | H           | -3.88893700 | 4.83767500  | 0.55685800  |
| C                          | 1.45385600  | -0.82752700 | 1.53315500  | H           | -4.76254000 | 3.37933100  | 0.05317000  |

|               |             |             |             |   |             |             |             |
|---------------|-------------|-------------|-------------|---|-------------|-------------|-------------|
| H             | -3.81470300 | 3.37826300  | 1.55144400  | H | -0.61353300 | -2.60860700 | -0.12127500 |
| C             | -1.24266400 | -1.81654600 | -1.80640800 | N | -0.38773400 | -0.89639700 | -1.36185100 |
| C             | -0.21153300 | -2.68963700 | -2.15109200 | C | -1.47925200 | -0.30642900 | -1.90190100 |
| C             | -0.33934200 | -3.54652500 | -3.23797600 | O | -1.43657800 | 0.90971100  | -2.16939100 |
| C             | -1.52670300 | -3.49641900 | -3.96701300 | C | -2.75483100 | -1.10524600 | -2.23156500 |
| C             | -2.55785200 | -2.60798100 | -3.62655000 | C | -3.15272800 | -2.12909700 | -1.15126900 |
| C             | -2.42908900 | -1.74867600 | -2.54128300 | C | -3.90517000 | -0.10081000 | -2.38568300 |
| C             | -0.81648100 | -1.03162500 | -0.64476600 | C | -2.53445500 | -1.79895900 | -3.58874600 |
| C             | 0.91709600  | -2.51586300 | -1.19012400 | H | -2.63197800 | -3.08087700 | -1.25595800 |
| H             | 0.45578500  | -4.23126300 | -3.51180400 | H | -2.97479300 | -1.74440700 | -0.14315200 |
| H             | -1.65560500 | -4.15609500 | -4.81854300 | H | -4.22255100 | -2.33558900 | -1.24557400 |
| H             | -3.46258300 | -2.58842600 | -4.22334500 | H | -3.68544000 | 0.64931500  | -3.14610600 |
| H             | -3.20411600 | -1.03329100 | -2.28532700 | H | -4.81044500 | -0.64243200 | -2.67336100 |
| H             | 1.82047900  | -2.12104700 | -1.66376500 | H | -4.10680000 | 0.42483500  | -1.44754900 |
| N             | 0.38061600  | -1.50781400 | -0.25210900 | H | -3.44384000 | -2.34141400 | -3.86567200 |
| C             | 1.16512600  | -0.86709000 | 0.76479500  | H | -2.32475000 | -1.06310200 | -4.37066700 |
| O             | 0.84153600  | 0.25373600  | 1.07313900  | H | -1.71084700 | -2.51720600 | -3.56359900 |
| C             | 2.25517400  | -1.65324900 | 1.50145500  | C | 1.89745400  | 2.09785700  | -0.76762400 |
| C             | 2.89881800  | -0.68402900 | 2.49893900  | C | 2.97716400  | 2.33565500  | 0.06798300  |
| C             | 1.54963800  | -2.78004100 | 2.27800800  | C | 3.90980700  | 3.32368900  | -0.23825200 |
| C             | 3.37011200  | -2.23223000 | 0.61148600  | C | 3.72704000  | 4.06883300  | -1.40301300 |
| H             | 3.41324700  | 0.13012100  | 1.98063700  | C | 2.62971700  | 3.83459700  | -2.23979300 |
| H             | 2.15793600  | -0.24725400 | 3.17179800  | C | 1.70195200  | 2.84231900  | -1.92793000 |
| H             | 3.63366100  | -1.23156800 | 3.09492100  | C | 1.01738800  | 0.99013100  | -0.22824700 |
| H             | 1.01905800  | -3.47342100 | 1.61868100  | C | 2.92986200  | 1.42152500  | 1.25586100  |
| H             | 2.30421300  | -3.34848600 | 2.82982600  | H | 4.75785500  | 3.51347200  | 0.41231800  |
| H             | 0.83198700  | -2.37021400 | 2.99500100  | H | 4.44180300  | 4.84265100  | -1.66281200 |
| H             | 4.19750300  | -2.51847000 | 1.26688100  | H | 2.50157900  | 4.42826100  | -3.13849300 |
| H             | 3.06706200  | -3.12990000 | 0.07320100  | H | 0.84656000  | 2.65941000  | -2.57303700 |
| H             | 3.73475700  | -1.49208200 | -0.10370700 | H | 2.80743600  | 1.99514600  | 2.17744500  |
| H             | -2.82821700 | -0.68611700 | -0.19168600 | N | 1.74510000  | 0.59099700  | 0.98366800  |
| H             | -2.34555200 | 2.07632700  | 2.28458400  | C | 1.25337700  | -0.43191900 | 1.74437700  |
| H             | 1.14846100  | -3.43964100 | -0.65630200 | O | 0.18883000  | -0.95335600 | 1.41196800  |
| O             | -0.34864500 | 0.68936400  | -1.73754800 | C | 2.04109900  | -0.99323600 | 2.94520500  |
| H             | 0.03641500  | 0.31246300  | -2.54365900 | C | 1.11016700  | -1.95502700 | 3.69424300  |
| C             | 2.66321200  | 1.31370100  | -1.08291100 | C | 3.22971200  | -1.79845900 | 2.39235400  |
| O             | 2.67451900  | 0.12707400  | -1.44007900 | C | 2.52373100  | 0.07648500  | 3.94071700  |
| O             | 1.71738500  | 2.13315500  | -1.03932800 | H | 0.25122100  | -1.42596300 | 4.11694700  |
| H             | 0.40044200  | 1.24761700  | -1.35753600 | H | 0.73334400  | -2.74006200 | 3.03679600  |
| C             | 4.01682500  | 1.91673100  | -0.60984000 | H | 1.66638400  | -2.41937500 | 4.51336400  |
| F             | 3.91583700  | 2.45302600  | 0.62135400  | H | 3.94834200  | -1.17328200 | 1.85736700  |
| F             | 4.42103000  | 2.90538800  | -1.43348800 | H | 3.75584100  | -2.27813500 | 3.22398500  |
| F             | 5.00948300  | 1.01568600  | -0.56411000 | H | 2.88294000  | -2.58086500 | 1.70949100  |
| <b>18+TFA</b> |             |             |             | H | 2.73185300  | -0.41068900 | 4.89760200  |
| C             | 1.31518100  | -2.45635800 | -1.08041200 | H | 3.44542200  | 0.56620400  | 3.62604000  |
| C             | 1.91793000  | -1.21135100 | -1.22670900 | H | 1.76008200  | 0.84033100  | 4.11728100  |
| C             | 3.30417500  | -1.08908400 | -1.27504300 | H | 0.94662500  | 0.39352800  | -2.28539900 |
| C             | 4.07990100  | -2.24499200 | -1.17431800 | H | -0.62239300 | -2.94490700 | -1.87167300 |
| C             | 3.47469600  | -3.49649000 | -1.02531800 | H | 3.83487000  | 0.81264900  | 1.33680100  |
| C             | 2.08458100  | -3.61180000 | -0.97646100 | O | -0.24877000 | 1.49816600  | 0.15734000  |
| C             | -0.18226900 | -2.33026700 | -1.08545700 | H | -0.76475600 | 1.65643300  | -0.66421700 |
| C             | 0.87332900  | -0.13238000 | -1.32825400 | C | -3.18641800 | 1.17278900  | 1.03462800  |
| H             | 3.77570000  | -0.11741100 | -1.39593100 | O | -3.03004400 | 2.22692000  | 0.47416300  |
| H             | 5.16153800  | -2.17164100 | -1.21481800 | O | -2.30574800 | 0.23854300  | 1.29141400  |
| H             | 4.09092400  | -4.38639600 | -0.95148600 | H | -1.39548500 | 0.49424800  | 0.95732100  |
| H             | 1.61467700  | -4.58399700 | -0.86438400 | C | -4.57151800 | 0.75232400  | 1.57795000  |

|            |             |             |             |             |             |             |             |
|------------|-------------|-------------|-------------|-------------|-------------|-------------|-------------|
| F          | -4.54905300 | 0.68354900  | 2.91724300  | H           | -1.70000100 | 2.52962900  | 2.10114200  |
| F          | -4.92834800 | -0.45319600 | 1.11456100  | H           | -0.63466500 | 2.81443800  | 3.46609600  |
| F          | -5.50928800 | 1.62764600  | 1.22284000  | H           | 0.05395600  | 2.64288100  | 1.84682600  |
| <b>11B</b> |             |             |             | H           | -1.99654400 | 0.77913000  | 4.40945400  |
| C          | 2.33617400  | 1.91430100  | 0.27686600  | H           | -2.69835900 | 0.23843000  | 2.87569400  |
| C          | 1.33599100  | 1.90067000  | -0.69142400 | H           | -1.64255500 | -0.84640900 | 3.78938800  |
| C          | 0.64046700  | 3.06193400  | -1.02107300 | H           | 1.30136100  | 0.47131500  | -2.32940900 |
| C          | 0.96733500  | 4.24374800  | -0.35433500 | H           | -0.16017300 | -1.19507900 | -0.95618700 |
| C          | 1.97075600  | 4.25814100  | 0.61980300  | H           | 4.02534600  | 0.56953300  | 0.28397800  |
| C          | 2.66478500  | 3.09179300  | 0.94391900  | F           | -3.02580500 | -2.63431800 | 2.06829100  |
| C          | 2.94414000  | 0.54791800  | 0.44150400  | F           | -3.92687000 | -0.85598200 | 0.91623700  |
| C          | 1.16813700  | 0.50997600  | -1.24356300 | F           | -4.48932200 | -3.01508600 | 0.35223300  |
| H          | -0.13025600 | 3.05650600  | -1.78681800 | B           | -3.42246800 | -2.17986100 | 0.78023000  |
| H          | 0.44176000  | 5.16066400  | -0.59830100 | O           | -2.33258300 | -2.14852800 | -0.14818800 |
| H          | 2.21297100  | 5.18607900  | 1.12670100  | H           | -1.92834200 | -3.02061100 | -0.22458800 |
| H          | 3.44743200  | 3.10505900  | 1.69650600  | <b>TS1B</b> |             |             |             |
| H          | 2.74384700  | 0.14094600  | 1.43785100  | C           | 0.62582000  | 2.82157800  | -0.65239800 |
| N          | 2.26318800  | -0.22890000 | -0.60511100 | C           | -0.34729300 | 2.04411600  | -1.26949700 |
| C          | 2.53160100  | -1.48009500 | -1.07396700 | C           | -1.59748200 | 2.57014300  | -1.58236300 |
| O          | 1.83681700  | -1.92347800 | -1.99371200 | C           | -1.85239600 | 3.90666000  | -1.27263000 |
| C          | 3.70350700  | -2.30900500 | -0.51772500 | C           | -0.87322300 | 4.69270400  | -0.65555400 |
| C          | 3.82300900  | -2.26756600 | 1.01520800  | C           | 0.37426400  | 4.15592400  | -0.33738200 |
| C          | 3.48035900  | -3.76647800 | -0.94073100 | C           | 1.87495300  | 2.01826200  | -0.41169300 |
| C          | 4.99731000  | -1.79931500 | -1.17641100 | C           | 0.13765700  | 0.62674700  | -1.45242100 |
| H          | 4.32630200  | -1.37067700 | 1.37742200  | H           | -2.35758500 | 1.95648600  | -2.05785300 |
| H          | 2.84408000  | -2.34270300 | 1.49883900  | H           | -2.81600900 | 4.34066400  | -1.51714100 |
| H          | 4.42209800  | -3.12354000 | 1.33892700  | H           | -1.08510200 | 5.73065300  | -0.42195600 |
| H          | 3.38577000  | -3.85875700 | -2.02341800 | H           | 1.13270800  | 4.76794000  | 0.14132600  |
| H          | 4.33331400  | -4.36591400 | -0.61032700 | H           | 2.06707600  | 1.90292000  | 0.65996800  |
| H          | 2.57447500  | -4.17553900 | -0.48377600 | N           | 1.55201300  | 0.72642900  | -1.03885400 |
| H          | 5.84267900  | -2.39820400 | -0.82313100 | C           | 2.37264100  | -0.32260800 | -1.28229500 |
| H          | 4.94203200  | -1.89594500 | -2.26478100 | O           | 1.90872000  | -1.32069600 | -1.85703700 |
| H          | 5.20553400  | -0.75353100 | -0.93577900 | C           | 3.86542100  | -0.29303900 | -0.89893000 |
| C          | -1.26152100 | 0.33866000  | -1.98417000 | C           | 4.13534400  | 0.28446800  | 0.50001200  |
| C          | -2.34565700 | 0.91945500  | -1.31067800 | C           | 4.37765500  | -1.73896600 | -0.91632000 |
| C          | -3.46290700 | 1.42437500  | -1.98330900 | C           | 4.61977200  | 0.50826700  | -1.97321600 |
| C          | -3.45618200 | 1.34150000  | -3.36850400 | H           | 4.11099700  | 1.37353300  | 0.52368500  |
| C          | -2.36799100 | 0.76721000  | -4.04691800 | H           | 3.42271600  | -0.10054200 | 1.23543600  |
| C          | -1.25769700 | 0.26055600  | -3.36986500 | H           | 5.13940000  | -0.01929200 | 0.81051200  |
| C          | -0.23873200 | -0.10555500 | -0.98726700 | H           | 4.21109600  | -2.21416700 | -1.88363600 |
| C          | -2.04727400 | 0.86143800  | 0.08783800  | H           | 5.45072000  | -1.73572400 | -0.70545300 |
| H          | -4.29604100 | 1.85805500  | -1.44162300 | H           | 3.88033700  | -2.33964800 | -0.14774300 |
| H          | -4.29903000 | 1.71709600  | -3.93715300 | H           | 5.68500800  | 0.53318300  | -1.72232100 |
| H          | -2.39626400 | 0.71052600  | -5.12986500 | H           | 4.50959200  | 0.03658500  | -2.95427800 |
| H          | -0.43230000 | -0.19058800 | -3.90990900 | H           | 4.26754100  | 1.54020300  | -2.04892600 |
| H          | -2.68706500 | 1.17747200  | 0.89850400  | C           | -1.95166100 | -0.84373600 | -1.34097600 |
| N          | -0.86825200 | 0.32846100  | 0.28668400  | C           | -3.00761200 | -0.86708200 | -0.39726600 |
| C          | -0.26776100 | -0.04713300 | 1.55711400  | C           | -4.28505000 | -1.37594800 | -0.71867500 |
| O          | 0.47021800  | -0.99576400 | 1.52010600  | C           | -4.48525700 | -1.82747800 | -2.00308800 |
| C          | -0.55635500 | 0.77470100  | 2.81230500  | C           | -3.43581800 | -1.78751900 | -2.95839800 |
| C          | 0.65726500  | 0.59036300  | 3.73532800  | C           | -2.17808400 | -1.30719500 | -2.65057000 |
| C          | -0.72541600 | 2.27371400  | 2.52031100  | C           | -0.74788700 | -0.37007800 | -0.68919000 |
| C          | -1.80589400 | 0.19556200  | 3.50411500  | C           | -2.49075600 | -0.33333100 | 0.80365900  |
| H          | 0.84309200  | -0.46333900 | 3.94908900  | H           | -5.07286900 | -1.40350500 | 0.02602000  |
| H          | 1.55907700  | 1.02113200  | 3.28712100  | H           | -5.45135500 | -2.22140800 | -2.29748700 |
| H          | 0.46193500  | 1.10975000  | 4.67665100  | H           | -3.63120200 | -2.15606000 | -3.96003700 |

|                                         |             |             |             |             |             |             |             |
|-----------------------------------------|-------------|-------------|-------------|-------------|-------------|-------------|-------------|
| H                                       | -1.38668600 | -1.30686900 | -3.39247400 | H           | 0.29482700  | 4.78875500  | -0.87314000 |
| H                                       | -2.98009400 | -0.28015700 | 1.76625100  | C           | 0.82395100  | -1.54156400 | -1.33552200 |
| N                                       | -1.22157800 | 0.01593800  | 0.62390600  | C           | 0.90510000  | -2.75292800 | -0.55765200 |
| C                                       | -0.28126600 | 0.39402700  | 1.66122800  | C           | 1.85338900  | -3.76657200 | -0.89368900 |
| O                                       | 0.83134400  | -0.05151900 | 1.56168900  | C           | 2.67157700  | -3.56410200 | -1.96861300 |
| C                                       | -0.72444900 | 1.33708900  | 2.77719600  | C           | 2.58693400  | -2.36196400 | -2.75491400 |
| C                                       | 0.51286600  | 2.15683500  | 3.17235400  | C           | 1.68712800  | -1.37126100 | -2.46389500 |
| C                                       | -1.83691300 | 2.30634500  | 2.35476500  | C           | -0.14519300 | -0.72860600 | -0.75872200 |
| C                                       | -1.15228300 | 0.46965200  | 3.97672100  | C           | -0.03706700 | -2.65233100 | 0.45013800  |
| H                                       | 1.34118700  | 1.51385300  | 3.47470200  | H           | 1.92040200  | -4.67108700 | -0.29775000 |
| H                                       | 0.84167300  | 2.78666500  | 2.33847900  | H           | 3.40446900  | -4.31530600 | -2.24274500 |
| H                                       | 0.25027700  | 2.80765400  | 4.01022200  | H           | 3.25804300  | -2.24556700 | -3.59969800 |
| H                                       | -2.81240100 | 1.82958200  | 2.25158200  | H           | 1.64444700  | -0.46688100 | -3.06195400 |
| H                                       | -1.93199300 | 3.07583400  | 3.12560600  | H           | -0.26428100 | -3.31668000 | 1.26825500  |
| H                                       | -1.59318200 | 2.80386000  | 1.40970300  | N           | -0.66623600 | -1.43853800 | 0.31381800  |
| H                                       | -1.42543300 | 1.13228100  | 4.80317500  | C           | -1.61321600 | -0.91267200 | 1.26105700  |
| H                                       | -2.01306800 | -0.16537200 | 3.75494100  | O           | -1.48118100 | 0.23238000  | 1.61541100  |
| H                                       | -0.32867700 | -0.17250500 | 4.30004400  | C           | -2.75432400 | -1.80326500 | 1.75807100  |
| H                                       | 0.10326600  | 0.30766100  | -2.49845800 | C           | -3.96959000 | -0.87750800 | 1.93063000  |
| H                                       | -0.13407500 | -1.55710500 | -0.40643700 | C           | -3.12415400 | -2.92289800 | 0.77857200  |
| H                                       | 2.74915000  | 2.48078600  | -0.87622200 | C           | -2.36155200 | -2.37708200 | 3.13173600  |
| F                                       | 1.50130300  | -3.20280500 | 1.84194200  | H           | -3.75939000 | -0.06866100 | 2.63234400  |
| F                                       | -0.74113000 | -2.63168200 | 1.88123500  | H           | -4.26293300 | -0.43786700 | 0.97101800  |
| F                                       | -0.07654200 | -4.64926300 | 1.03529300  | H           | -4.80935800 | -1.46414000 | 2.31239200  |
| B                                       | 0.27341600  | -3.29695100 | 1.17479300  | H           | -2.38516500 | -3.72433700 | 0.74748700  |
| O                                       | 0.36891000  | -2.67340500 | -0.16541700 | H           | -4.07465000 | -3.35964000 | 1.09733600  |
| H                                       | 1.25861300  | -2.59611600 | -0.54911100 | H           | -3.25415400 | -2.53271700 | -0.23550300 |
| <b>16+BF<sub>3</sub>·H<sub>2</sub>O</b> |             |             |             | H           | -3.20556600 | -2.95175100 | 3.52469400  |
| C                                       | -2.61988600 | 1.83105600  | -0.69846700 | H           | -1.49680400 | -3.04239800 | 3.07257500  |
| C                                       | -2.17475300 | 0.69116300  | -1.35647800 | H           | -2.13203700 | -1.57361500 | 3.83678700  |
| C                                       | -3.06707400 | -0.17277200 | -1.98249800 | H           | -0.23681900 | 0.67859400  | -2.28578300 |
| C                                       | -4.42775800 | 0.13893100  | -1.95073100 | H           | 3.47725500  | -0.81442200 | -0.86724600 |
| C                                       | -4.87655200 | 1.29064700  | -1.29763200 | H           | -1.41115700 | 3.60224200  | -0.39375900 |
| C                                       | -3.97495000 | 2.14478300  | -0.65983400 | F           | 2.15900000  | -0.09024100 | 1.60625500  |
| C                                       | -1.47561800 | 2.56502000  | -0.05739800 | F           | 3.69435100  | -1.77987500 | 1.26784000  |
| C                                       | -0.67157000 | 0.57448400  | -1.28607300 | F           | 4.39430600  | 0.31812700  | 1.88352800  |
| H                                       | -2.71294500 | -1.06738300 | -2.48704500 | B           | 3.44504600  | -0.41709800 | 1.18877100  |
| H                                       | -5.14189200 | -0.51837000 | -2.43524800 | O           | 3.55994900  | -0.03405700 | -0.28783100 |
| H                                       | -5.93693100 | 1.51890400  | -1.27977400 | H           | 2.81280100  | 0.66968900  | -0.60892100 |
| H                                       | -4.32565900 | 3.03185700  | -0.14150500 | <b>TS2B</b> |             |             |             |
| H                                       | -1.56284300 | 2.53778700  | 1.02897600  | C           | -1.19736200 | -0.45052100 | 1.59261400  |
| N                                       | -0.29961700 | 1.79677900  | -0.51131600 | C           | 0.11702700  | -0.72478100 | 1.15649200  |
| C                                       | 0.98564200  | 2.13835600  | -0.44632000 | C           | 0.98747500  | -1.52087400 | 1.93837700  |
| O                                       | 1.80602600  | 1.43519300  | -1.10040500 | C           | 0.52357900  | -1.99523400 | 3.13898800  |
| C                                       | 1.49202900  | 3.37204800  | 0.31322600  | C           | -0.79813300 | -1.70871200 | 3.57865800  |
| C                                       | 0.77168200  | 3.61908300  | 1.64793300  | C           | -1.66501000 | -0.95862800 | 2.82215000  |
| C                                       | 2.98429200  | 3.16526600  | 0.60936000  | C           | -1.88771500 | 0.28936800  | 0.57552200  |
| C                                       | 1.33929500  | 4.58454300  | -0.62418200 | C           | 0.26998000  | -0.09493700 | -0.10988500 |
| H                                       | -0.19398400 | 4.10962900  | 1.52595500  | H           | 1.98635100  | -1.75334500 | 1.59929900  |
| H                                       | 0.63155200  | 2.68729800  | 2.20481700  | H           | 1.16249300  | -2.60449200 | 3.76286000  |
| H                                       | 1.39398300  | 4.28093800  | 2.25603500  | H           | -1.12532100 | -2.10314700 | 4.53163500  |
| H                                       | 3.55981300  | 2.98642000  | -0.30085400 | H           | -2.68083200 | -0.76005000 | 3.13199800  |
| H                                       | 3.37237000  | 4.06817400  | 1.08796600  | H           | -2.52202100 | 1.13017900  | 0.82391900  |
| H                                       | 3.13909300  | 2.32827100  | 1.29622100  | N           | -0.86570800 | 0.53062900  | -0.41182600 |
| H                                       | 1.74430800  | 5.46959000  | -0.12421700 | C           | -1.10424100 | 1.21301000  | -1.66968200 |
| H                                       | 1.89510700  | 4.43111600  | -1.55371600 | O           | -0.75560400 | 0.64859800  | -2.67693600 |

|            |             |             |             |   |             |             |             |
|------------|-------------|-------------|-------------|---|-------------|-------------|-------------|
| C          | -1.73343800 | 2.59867100  | -1.63497300 | C | -1.24856400 | -1.88063600 | 3.70738900  |
| C          | -1.22687700 | 3.41185500  | -0.43273000 | C | -1.81572400 | -0.74552700 | 3.20159000  |
| C          | -1.33053700 | 3.30860700  | -2.93780900 | C | -1.66268100 | 0.87851300  | 1.19962400  |
| C          | -3.26961400 | 2.44552400  | -1.61057200 | C | -0.00137700 | -0.20353700 | 0.08762500  |
| H          | -1.60839800 | 3.03623600  | 0.51577900  | H | 1.14009000  | -2.60353600 | 1.34383300  |
| H          | -0.13676300 | 3.41098900  | -0.38976800 | H | 0.25021100  | -3.44174800 | 3.47334000  |
| H          | -1.57086800 | 4.44114700  | -0.54334000 | H | -1.61054900 | -2.29280600 | 4.64329600  |
| H          | -1.66847500 | 2.75477900  | -3.81219700 | H | -2.62655200 | -0.23975900 | 3.71567600  |
| H          | -1.78916700 | 4.29775500  | -2.95150700 | H | -2.43383900 | 1.61726900  | 1.34571600  |
| H          | -0.24736100 | 3.42893000  | -2.99803400 | N | -0.86353800 | 0.87677300  | 0.08350500  |
| H          | -3.71186000 | 3.44189800  | -1.66147400 | C | -0.95844000 | 1.84060900  | -0.99517700 |
| H          | -3.61213700 | 1.87109600  | -2.47309300 | O | -0.92029200 | 1.42214600  | -2.12419500 |
| H          | -3.63826200 | 1.96142900  | -0.70833300 | C | -1.12749500 | 3.32493400  | -0.65943800 |
| C          | 1.71734800  | -1.50805300 | -1.58013700 | C | -0.55874300 | 3.72641100  | 0.70730500  |
| C          | 2.97406100  | -1.97372600 | -1.22614800 | C | -0.38345700 | 4.10320700  | -1.75654600 |
| C          | 3.40575400  | -3.22710900 | -1.64161300 | C | -2.63107600 | 3.65820400  | -0.74377900 |
| C          | 2.54697600  | -4.00371900 | -2.41747200 | H | -1.17888400 | 3.39259000  | 1.54012000  |
| C          | 1.28263700  | -3.53021400 | -2.77277000 | H | 0.45284400  | 3.33479400  | 0.83866900  |
| C          | 0.85452100  | -2.27261500 | -2.35430400 | H | -0.51425100 | 4.81847100  | 0.75063800  |
| C          | 1.48598000  | -0.12904700 | -1.00782200 | H | -0.76518200 | 3.85549300  | -2.74855700 |
| C          | 3.72550100  | -0.94869700 | -0.41905100 | H | -0.52614500 | 5.17342600  | -1.58504600 |
| H          | 4.38686900  | -3.59404100 | -1.36967600 | H | 0.68652900  | 3.88063800  | -1.72508200 |
| H          | 2.86369900  | -4.98346600 | -2.74851200 | H | -2.75539100 | 4.73552700  | -0.59903500 |
| H          | 0.62938800  | -4.14491800 | -3.37685700 | H | -3.03671700 | 3.39115100  | -1.72320600 |
| H          | -0.12199800 | -1.89539200 | -2.62598300 | H | -3.21509300 | 3.14632800  | 0.02539700  |
| H          | 4.57794700  | -0.58016900 | -0.98650900 | C | 1.15327900  | -1.92978100 | -1.31525800 |
| N          | 2.71278900  | 0.11274700  | -0.22688700 | C | 2.41408600  | -2.42876400 | -1.01333800 |
| C          | 2.80971800  | 1.34384300  | 0.36262900  | C | 2.72012100  | -3.76926000 | -1.23190800 |
| O          | 1.89566100  | 2.14324500  | 0.15222200  | C | 1.73269600  | -4.60057100 | -1.76158200 |
| C          | 3.95521700  | 1.71565300  | 1.32107800  | C | 0.46439300  | -4.09591500 | -2.06746900 |
| C          | 3.81572500  | 3.21093200  | 1.63288100  | C | 0.16291600  | -2.75217300 | -1.84326400 |
| C          | 3.78740000  | 0.93302700  | 2.63630000  | C | 1.05355000  | -0.46696300 | -0.95694000 |
| C          | 5.35602500  | 1.48723100  | 0.72231300  | C | 3.29855400  | -1.35337500 | -0.44457100 |
| H          | 3.92792300  | 3.81420200  | 0.73141700  | H | 3.70323500  | -4.16229800 | -0.99171100 |
| H          | 2.84400700  | 3.43380100  | 2.07133300  | H | 1.95034700  | -5.64840600 | -1.93893900 |
| H          | 4.59437200  | 3.49736300  | 2.34166400  | H | -0.29025000 | -4.75630300 | -2.48110800 |
| H          | 3.92071500  | -0.13960700 | 2.50776500  | H | -0.82272900 | -2.35652800 | -2.07149200 |
| H          | 4.53845400  | 1.27715500  | 3.35009200  | H | 4.16864900  | -1.19245100 | -1.08474000 |
| H          | 2.80032500  | 1.11115100  | 3.06786300  | N | 2.41618500  | -0.17639600 | -0.44773400 |
| H          | 6.07978300  | 2.04255600  | 1.32168800  | C | 2.70532400  | 1.12220000  | -0.17081300 |
| H          | 5.66360000  | 0.44580400  | 0.73691200  | O | 1.85982700  | 1.98472500  | -0.43633300 |
| H          | 5.41457800  | 1.85946000  | -0.30267000 | C | 3.99841500  | 1.50674400  | 0.57230900  |
| H          | -2.88403500 | -0.57772000 | 0.08544800  | C | 4.09790900  | 3.03631900  | 0.58280700  |
| H          | 4.07757800  | -1.35244800 | 0.52964500  | C | 3.85295500  | 1.00503800  | 2.02002000  |
| F          | -5.75386200 | 0.29326500  | -0.05517800 | C | 5.28307600  | 0.94686200  | -0.06192000 |
| F          | -4.66592200 | -0.29552900 | 1.86769100  | H | 4.20861800  | 3.43168400  | -0.43093900 |
| F          | -5.95518000 | -1.84849600 | 0.74249100  | H | 3.21207700  | 3.49251900  | 1.02805600  |
| B          | -5.11545100 | -0.74767900 | 0.62051700  | H | 4.97575100  | 3.33180800  | 1.16452100  |
| O          | -3.89293400 | -1.16446600 | -0.14089900 | H | 3.79035300  | -0.08521200 | 2.07398200  |
| H          | -3.90185500 | -1.98372400 | -0.65469000 | H | 4.72308900  | 1.32017900  | 2.60446400  |
| H          | 1.38465200  | 0.62405600  | -1.78660900 | H | 2.95571800  | 1.42278700  | 2.48794800  |
| <b>17B</b> |             |             |             | H | 6.13602500  | 1.50643000  | 0.33323000  |
| C          | -1.31210300 | -0.22607300 | 1.96685700  | H | 5.45354300  | -0.10313900 | 0.17663800  |
| C          | -0.24586800 | -0.90575900 | 1.26758800  | H | 5.28279900  | 1.06665700  | -1.14983200 |
| C          | 0.32894400  | -2.08349300 | 1.84252500  | H | -2.62571100 | -1.02433600 | 0.57438200  |
| C          | -0.17077500 | -2.54644400 | 3.02816900  | H | 3.64637100  | -1.60288900 | 0.56391400  |



|                            |             |             |             |             |             |             |             |
|----------------------------|-------------|-------------|-------------|-------------|-------------|-------------|-------------|
| F                          | -4.05798400 | 0.51437300  | -1.14487000 | C           | -2.26327200 | -2.50665000 | 3.10835600  |
| F                          | -4.99870400 | -0.21537800 | 0.81106700  | H           | -3.58808000 | -0.13205300 | 3.24413700  |
| F                          | -5.30263300 | -1.42849900 | -1.11942800 | H           | -4.34580000 | -0.15109500 | 1.63890800  |
| B                          | -4.49090400 | -0.56746800 | -0.42156400 | H           | -4.76741100 | -1.39324200 | 2.83590600  |
| O                          | -3.17966500 | -1.41511400 | -0.14256100 | H           | -2.71154100 | -3.34524000 | 0.44697500  |
| H                          | -3.35170800 | -2.35100200 | 0.07460400  | H           | -4.22650500 | -3.23799600 | 1.33838100  |
| H                          | 0.85818200  | 0.14422500  | -1.83837200 | H           | -3.88840700 | -2.08069500 | 0.04575200  |
| <b>17B--H<sub>2</sub>O</b> |             |             |             | H           | -3.09217900 | -3.00606300 | 3.61756300  |
| C                          | -3.03223800 | 1.63895500  | -0.76681900 | H           | -1.55461100 | -3.27484600 | 2.79373300  |
| C                          | -2.53777800 | 0.49848200  | -1.39072400 | H           | -1.76929400 | -1.84349600 | 3.82375700  |
| C                          | -3.38361200 | -0.41397900 | -2.01293500 | H           | -0.59770700 | 0.55273700  | -2.33457200 |
| C                          | -4.75622600 | -0.16516400 | -1.98734900 | H           | -1.90400200 | 3.47632600  | -0.61060700 |
| C                          | -5.25885600 | 0.97422400  | -1.35188800 | H           | -0.71624100 | -3.46133600 | 0.72958500  |
| C                          | -4.40124000 | 1.88711500  | -0.73615000 | O           | 1.29730200  | -0.30311900 | 2.18133700  |
| C                          | -1.92001900 | 2.46737600  | -0.18924500 | H           | 0.82076300  | 0.51775400  | 2.00430300  |
| C                          | -1.02963000 | 0.48577700  | -1.33115700 | F           | 4.78682700  | 0.76527100  | 1.69946600  |
| H                          | -2.98853800 | -1.29703100 | -2.50695500 | F           | 5.28263700  | 0.48807500  | -0.52356800 |
| H                          | -5.43808400 | -0.86085700 | -2.46401400 | F           | 5.30689100  | -1.32115800 | 0.90974400  |
| H                          | -6.32848500 | 1.15369300  | -1.34154500 | B           | 4.63690000  | -0.11549500 | 0.59034500  |
| H                          | -4.79459100 | 2.77394700  | -0.24971100 | H           | 2.06083700  | -0.31183600 | 1.55691400  |
| H                          | -2.00640500 | 2.53090700  | 0.89619500  | H           | 2.85074800  | 0.27011300  | -0.26890100 |
| N                          | -0.71765900 | 1.71426500  | -0.58719900 | O           | 3.25719400  | -0.39656400 | 0.30705800  |
| C                          | 0.59466200  | 2.04472000  | -0.48190800 | <b>TS3B</b> |             |             |             |
| O                          | 1.41670700  | 1.26953100  | -0.98870200 | C           | 2.25547400  | -2.21217500 | -0.72882100 |
| C                          | 1.05760400  | 3.33823200  | 0.20489800  | C           | 2.02770300  | -0.97817300 | -1.32668700 |
| C                          | 0.28783700  | 3.65827100  | 1.49675000  | C           | 3.02207100  | -0.32510300 | -2.04727100 |
| C                          | 2.54060200  | 3.16134900  | 0.55551300  | C           | 4.27041100  | -0.93891100 | -2.15555100 |
| C                          | 0.90935900  | 4.48741100  | -0.80728200 | C           | 4.50989800  | -2.17245700 | -1.54214900 |
| H                          | -0.66961000 | 4.14575800  | 1.30971300  | C           | 3.50434100  | -2.81983100 | -0.82166000 |
| H                          | 0.11226300  | 2.76175000  | 2.10105600  | C           | 1.01248600  | -2.71570800 | -0.05013200 |
| H                          | 0.88897900  | 4.34724400  | 2.09598800  | C           | 0.59508300  | -0.55244400 | -1.10419300 |
| H                          | 3.13967300  | 2.93175400  | -0.32740300 | H           | 2.83418300  | 0.63629800  | -2.51715800 |
| H                          | 2.91285200  | 4.08897200  | 0.99862300  | H           | 5.06210600  | -0.45337000 | -2.71581000 |
| H                          | 2.68449300  | 2.35450500  | 1.28105000  | H           | 5.48674300  | -2.63514700 | -1.63389000 |
| H                          | 1.27981800  | 5.41169100  | -0.35358300 | H           | 3.69030100  | -3.78103800 | -0.35311100 |
| H                          | 1.49525300  | 4.29088700  | -1.70974600 | H           | 1.14134100  | -2.76760700 | 1.03240800  |
| H                          | -0.13278300 | 4.65101800  | -1.09585900 | N           | -0.00017900 | -1.70547700 | -0.42703300 |
| C                          | 0.58416600  | -1.58096000 | -1.37261400 | C           | -1.33168800 | -1.92671800 | -0.64524100 |
| C                          | 0.84379400  | -2.67988200 | -0.54501500 | O           | -1.96518500 | -1.11576500 | -1.32813900 |
| C                          | 1.81134000  | -3.61548600 | -0.88783600 | C           | -2.04697300 | -3.13969200 | -0.02298800 |
| C                          | 2.50111500  | -3.41820900 | -2.08146200 | C           | -1.50100500 | -3.53151400 | 1.35948400  |
| C                          | 2.24067800  | -2.31553200 | -2.91390900 | C           | -3.52528400 | -2.75630200 | 0.14084000  |
| C                          | 1.28171000  | -1.37718400 | -2.56942100 | C           | -1.95057600 | -4.32074800 | -1.00464000 |
| C                          | -0.43320700 | -0.78000700 | -0.73367000 | H           | -0.58995500 | -4.12764200 | 1.30817500  |
| C                          | -0.04747100 | -2.60323200 | 0.64605000  | H           | -1.30887800 | -2.64978000 | 1.98122800  |
| H                          | 2.03121500  | -4.46366100 | -0.24955200 | H           | -2.25419000 | -4.13714000 | 1.87081100  |
| H                          | 3.26741600  | -4.12784900 | -2.37471800 | H           | -3.97082400 | -2.45529800 | -0.80872600 |
| H                          | 2.80946600  | -2.19332000 | -3.82841000 | H           | -4.07334800 | -3.62137800 | 0.52434500  |
| H                          | 1.09755300  | -0.51027800 | -3.19313100 | H           | -3.64376600 | -1.93631800 | 0.85614800  |
| H                          | 0.49976700  | -2.45741400 | 1.58262800  | H           | -2.50445100 | -5.17047100 | -0.59374800 |
| N                          | -0.82066300 | -1.37047600 | 0.37910400  | H           | -2.39258700 | -4.05937900 | -1.97035900 |
| C                          | -1.75212500 | -0.80793500 | 1.36696200  | H           | -0.92042100 | -4.64523200 | -1.17353200 |
| O                          | -1.57487400 | 0.33110700  | 1.69910500  | C           | -0.10603700 | 1.95199400  | -1.15601300 |
| C                          | -2.84742500 | -1.70786700 | 1.92317700  | C           | 0.39443300  | 3.14130600  | -0.62365800 |
| C                          | -3.95234600 | -0.77965700 | 2.44445400  | C           | -0.03792100 | 4.37094700  | -1.10380500 |
| C                          | -3.43823700 | -2.64635500 | 0.86511000  | C           | -0.98453700 | 4.36956900  | -2.12754600 |

|                                         |             |             |             |                       |             |             |             |
|-----------------------------------------|-------------|-------------|-------------|-----------------------|-------------|-------------|-------------|
| C                                       | -1.49277600 | 3.17348800  | -2.65640900 | C                     | -4.03656800 | -2.28436700 | -0.13929500 |
| C                                       | -1.06134800 | 1.94347700  | -2.17594300 | C                     | -2.65075800 | -3.70337700 | -1.65134300 |
| C                                       | 0.50866800  | 0.83995100  | -0.44290600 | H                     | -1.25008800 | -4.16234000 | 0.62416900  |
| C                                       | 1.37607500  | 2.82070300  | 0.45450400  | H                     | -1.84095600 | -2.82020800 | 1.62473100  |
| H                                       | 0.34432100  | 5.30117900  | -0.69858400 | H                     | -2.91225400 | -4.15507200 | 1.18916900  |
| H                                       | -1.34268400 | 5.31492800  | -2.52081600 | H                     | -4.46214100 | -1.75268200 | -0.99149800 |
| H                                       | -2.23891700 | 3.21295400  | -3.44184700 | H                     | -4.66450300 | -3.15330200 | 0.07499100  |
| H                                       | -1.47019700 | 1.01364300  | -2.55612000 | H                     | -4.06378800 | -1.62524100 | 0.73359600  |
| H                                       | 1.01586100  | 3.13924200  | 1.43720000  | H                     | -3.29163200 | -4.55973000 | -1.42078500 |
| N                                       | 1.43207400  | 1.34249300  | 0.39972900  | H                     | -3.07293300 | -3.18361700 | -2.51614100 |
| C                                       | 2.05332300  | 0.52708400  | 1.40298400  | H                     | -1.66473800 | -4.08555600 | -1.92653800 |
| O                                       | 1.50507000  | -0.51427600 | 1.67806800  | C                     | 0.36367100  | 2.19283100  | -0.76296800 |
| C                                       | 3.37273000  | 0.97274800  | 2.02982300  | C                     | 1.49836500  | 2.93025500  | -0.46012700 |
| C                                       | 3.85470100  | -0.17365500 | 2.92597400  | C                     | 1.71444500  | 4.17379600  | -1.04808100 |
| C                                       | 4.40686100  | 1.21314100  | 0.91887200  | C                     | 0.76024500  | 4.65992100  | -1.94131900 |
| C                                       | 3.20282600  | 2.23157600  | 2.90348100  | C                     | -0.38568500 | 3.91535000  | -2.24306200 |
| H                                       | 3.16090600  | -0.35040400 | 3.75139000  | C                     | -0.59209000 | 2.66673700  | -1.65835000 |
| H                                       | 3.96171000  | -1.10380900 | 2.36250400  | C                     | 0.35861400  | 0.87752900  | -0.02677000 |
| H                                       | 4.82871500  | 0.09513700  | 3.34245500  | C                     | 2.35521600  | 2.20670500  | 0.53615200  |
| H                                       | 4.09330800  | 1.97900400  | 0.20523400  | H                     | 2.60194400  | 4.75326400  | -0.81470200 |
| H                                       | 5.34170600  | 1.54550100  | 1.37962600  | H                     | 0.90771700  | 5.62713700  | -2.40994300 |
| H                                       | 4.60478800  | 0.28925700  | 0.36773000  | H                     | -1.11571700 | 4.31008100  | -2.94091500 |
| H                                       | 4.09037400  | 2.31818700  | 3.53618300  | H                     | -1.47247400 | 2.07968600  | -1.90420300 |
| H                                       | 3.13049900  | 3.15012200  | 2.32165600  | H                     | 2.42439900  | 2.77682100  | 1.46441700  |
| H                                       | 2.33011000  | 2.15428400  | 3.55837600  | N                     | 1.62069200  | 0.94720000  | 0.73878500  |
| H                                       | 0.08268000  | -0.42020100 | -2.05984100 | C                     | 1.88730200  | -0.04985500 | 1.62564900  |
| H                                       | 0.72803200  | -3.69863000 | -0.42739900 | O                     | 1.03346800  | -0.93329800 | 1.78383500  |
| H                                       | 2.36303800  | 3.24999600  | 0.27111600  | C                     | 3.23823300  | -0.14250600 | 2.35427700  |
| O                                       | -1.01615900 | 0.61956600  | 1.00056200  | C                     | 3.15100500  | -1.30551500 | 3.34971900  |
| H                                       | -0.93113600 | -0.24305600 | 1.43256600  | C                     | 4.31824600  | -0.46894900 | 1.30983200  |
| F                                       | -4.14267900 | 0.07230100  | 2.12402400  | C                     | 3.60705200  | 1.13251200  | 3.13336500  |
| F                                       | -5.60818700 | 0.09567900  | 0.35495200  | H                     | 2.40055200  | -1.11352300 | 4.12129600  |
| F                                       | -4.89508200 | 2.07312400  | 1.30546100  | H                     | 2.89247200  | -2.24117000 | 2.85034200  |
| B                                       | -4.50805000 | 0.76831600  | 0.93798400  | H                     | 4.12288600  | -1.42578900 | 3.83616400  |
| H                                       | -1.95731600 | 0.69732200  | 0.63899000  | H                     | 4.44324700  | 0.32876600  | 0.57418100  |
| H                                       | -3.35079900 | 0.07969700  | -0.58333700 | H                     | 5.27748300  | -0.60827200 | 1.81814500  |
| O                                       | -3.39677400 | 0.84212700  | 0.01392400  | H                     | 4.07550900  | -1.39242900 | 0.77468500  |
| <b>18+BF<sub>3</sub>·H<sub>2</sub>O</b> |             |             |             | H                     | 4.38179300  | 0.87715500  | 3.86182900  |
| C                                       | 1.75248400  | -2.19985400 | -1.08802500 | H                     | 4.01393700  | 1.91658400  | 2.49465400  |
| C                                       | 1.66243800  | -0.85740000 | -1.44026900 | H                     | 2.75002900  | 1.53289000  | 3.68403400  |
| C                                       | 2.72856600  | -0.20347300 | -2.05217700 | H                     | -0.20689400 | 0.09480900  | -1.95106200 |
| C                                       | 3.89277000  | -0.92750600 | -2.31190100 | H                     | 0.07944800  | -3.55431600 | -0.97782400 |
| C                                       | 3.98401400  | -2.27775700 | -1.95893100 | H                     | 3.36444600  | 2.02649500  | 0.15350100  |
| C                                       | 2.91313700  | -2.92551500 | -1.34104700 | O                     | -0.74970800 | 0.83084200  | 0.84730800  |
| C                                       | 0.47142800  | -2.67727000 | -0.46257300 | H                     | -0.63774400 | 0.01594000  | 1.37498300  |
| C                                       | 0.30937600  | -0.31004100 | -1.07790600 | F                     | -4.08799100 | 0.42079800  | 2.11227300  |
| H                                       | 2.65317700  | 0.84504100  | -2.32821200 | F                     | -5.49566900 | 0.75127800  | 0.32107100  |
| H                                       | 4.73271100  | -0.43982400 | -2.79500100 | F                     | -4.65992300 | 2.54918300  | 1.49387300  |
| H                                       | 4.89487300  | -2.82752400 | -2.17109700 | B                     | -4.43430000 | 1.25572900  | 1.05209900  |
| H                                       | 2.98284000  | -3.97450600 | -1.07051100 | H                     | -2.37787700 | 1.43821500  | 0.53474500  |
| H                                       | 0.60197400  | -2.89840300 | 0.59832300  | H                     | -3.06066900 | 0.49048900  | -0.49488100 |
| N                                       | -0.42743200 | -1.51634900 | -0.65295900 | O                     | -3.25055800 | 1.32129500  | 0.08895200  |
| C                                       | -1.76403400 | -1.54182100 | -0.79442600 | <b>H<sub>2</sub>O</b> |             |             |             |
| O                                       | -2.33870100 | -0.52899300 | -1.26515000 | O                     | 0.00000000  | 0.00000000  | 0.11791300  |
| C                                       | -2.60812400 | -2.77160200 | -0.42557000 | H                     | 0.00000000  | 0.76425200  | -0.47165300 |
| C                                       | -2.10469900 | -3.51625700 | 0.82174100  | H                     | 0.00000000  | -0.76425200 | -0.47165300 |
