# Supplementary material for: Experimental and computational study of BF3-catalyzed transformations of ortho-(pivaloylaminomethyl)benzaldehydes: an unexpected difference from TFA catalysis
Source: Royal Society of Chemistry journal article supplement (doi:10.1039/d1ob02308j), 2022-01-01
Supplement: d1ob02308j2.pdf [file d1ob02308j2.pdf]

**Supporting information**

for

**Experimental and computational study of  $\text{BF}_3$ -catalyzed transformations of *ortho*-  
(pivaloylaminomethyl)benzaldehydes: an unexpected difference from TFA catalysis**

Györgyi Koványi-Lax, Csilla Hargitai, Péter Ábrányi-Balogh, Tamás Nagy, Gábor Tóth, Zsófia Garádi,  
Gábor Németh, Angéla Pandur, Simon Horváth, András Dancsó, Gyula Simig, Balázs Volk\*

## Table of content

|                                                                                             |     |
|---------------------------------------------------------------------------------------------|-----|
| Compound <b>13</b> , description of structure determination                                 | S4  |
| Compound <b>13</b> , HRMS                                                                   | S5  |
| Compound <b>13</b> , <sup>1</sup> H NMR in CDCl <sub>3</sub>                                | S6  |
| Compound <b>13</b> , <sup>1</sup> H, <sup>1</sup> H-COSY and selTOCSY on δ 7.78             | S7  |
| Compound <b>13</b> , Steric proximities detected by NOESY                                   | S8  |
| Compound <b>13</b> , Steric proximities detected by selNOE on signals δ 5.19, 5.06 and 6.51 | S9  |
| Compound <b>13</b> , <sup>13</sup> C and Dept-135 NMR                                       | S10 |
| Compound <b>13</b> , edHSQC and CH <sub>3</sub> section                                     | S11 |
| Compound <b>13</b> , HMBC                                                                   | S12 |
| Compound <b>13</b> , selective HMBC (122–114 ppm)                                           | S13 |
| Compound <b>13</b> , selective HMBC (152–141 ppm)                                           | S14 |
| Compound <b>14</b> , description of structure determination                                 | S15 |
| Compound <b>14</b> , HRMS                                                                   | S16 |
| Compound <b>14</b> , <sup>1</sup> H NMR and Ar section in DMSO-d <sub>6</sub>               | S17 |
| Compound <b>14</b> , <sup>1</sup> H, <sup>1</sup> H-COSY and Ar section                     | S18 |
| Compound <b>14</b> , DEPTQ                                                                  | S19 |
| Compound <b>14</b> , edHSQC and Ar section                                                  | S20 |
| Compound <b>14</b> , HMBC and CH <sub>3</sub> section                                       | S21 |

## Table of content (continuation)

|                                                                                                                                                                                                       |     |
|-------------------------------------------------------------------------------------------------------------------------------------------------------------------------------------------------------|-----|
| Compound <b>15</b> , description of structure determination                                                                                                                                           | S22 |
| Compound <b>15</b> , <sup>1</sup> H NMR and <sup>13</sup> C NMR in DMSO- <i>d</i> <sub>6</sub>                                                                                                        | S23 |
| Compound <b>15</b> , <sup>1</sup> H NMR and sel-Tocsy on δ 7.49t and δ 7.36t signals                                                                                                                  | S24 |
| Compound <b>15</b> , ROESY and section (8.0–7.2 ppm)                                                                                                                                                  | S25 |
| Compound <b>15</b> , HSQC and Ar section with sel-Tocsy on δ 7.36                                                                                                                                     | S26 |
| Compound <b>15</b> , HMBC                                                                                                                                                                             | S27 |
| Compound <b>15</b> , selective HMBC (148–121 ppm)                                                                                                                                                     | S28 |
| Compound <b>15</b> , HRMS                                                                                                                                                                             | S29 |
| Monitoring of the composition of the reaction mixture by LC-MS during the BF <sub>3</sub> · H <sub>2</sub> O-catalyzed transformation of <i>ortho</i> -(pivaloylaminomethyl)benzaldehyde ( <b>5</b> ) | S30 |
| Monitoring of the composition of the reaction mixture by LC-MS during the BF <sub>3</sub> · H <sub>2</sub> O-catalyzed transformation of <b>6a</b>                                                    | S31 |
| Energy values obtained for the computation of the <b>11</b> → <b>18</b> transformation                                                                                                                | S32 |

#### S4. Compound **13**, description of structure determination

The molecular formula of compound **10** was established as  $C_{28}H_{32}N_2O_7$  by means of HRMS (page S5), indicating the presence of 14 double bond equivalents. Based on  $^1H$  and  $^{13}C$  NMR data (see pages S6–S14), this compound therefore contains 5 rings and 9 double bonds, which corresponds to two phenyl groups, two pivaloyl amide moieties  $N-C=O$  ( $\delta 177.73$  and  $\delta 176.86$  ppm) and one conjugated  $C=O$  group ( $\delta 198.63$  ppm). The  $^1H, ^1H$ -COSY experiment (page S7) revealed the connectivity of the  $^1H$  signals. To achieve an unambiguous assignment of the overlapping aromatic  $^1H$  signals, selective one-dimensional TOCSY experiment on  $\delta 7.78d$  signal (page S7) was also performed. Steric hydrogen-hydrogen proximities detected by two-dimensional NOESY (page S8) supported the differentiation of the two pivaloyl groups. However, due to the much higher resolution of the selective one-dimensional NOE experiments on the  $\delta 5.19$ ,  $5.06$  and  $6.51$  signals, even the selective detections of the interacting  $^1H$  signals (page S9) were achieved. The edited HSQC spectrum (page S11) served as the unambiguous  $^1H/^{13}C$  signal assignment even in case of the very close  $\delta Me_3$  ( $27.40$  and  $27.16$  ppm) signals. Quaternary carbon signals and also the connectivity of the various structural units of the molecule were identified on the basis of the HMBC spectrum (page S12). Out of the four aromatic  $=CH$  signals, only  $\delta 7.78d$  gave a HMBC cross-peak with the ketone  $C=O$  ( $\delta 198.63$  ppm), its connection to this aromatic ring is thus straightforward. In order to achieve the required extremely high  $^{13}C$  chemical shift resolution in cases of close  $^{13}C$  signals, the band-selective HMBC experiment (pages S13–14) proved to be the method of choice. Finally, structure of compound **10** was also confirmed by single-crystal X-ray measurement.

# S5. Compound **13**, HRMS

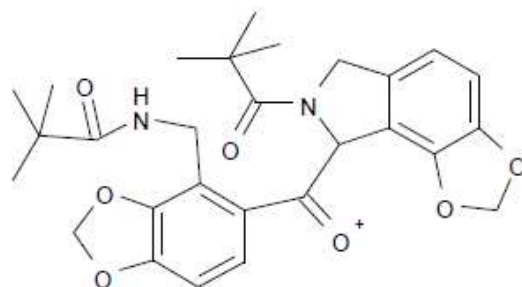

MH<sup>+</sup>: 509.2288  
C<sub>28</sub>H<sub>33</sub>N<sub>2</sub>O<sub>7</sub>

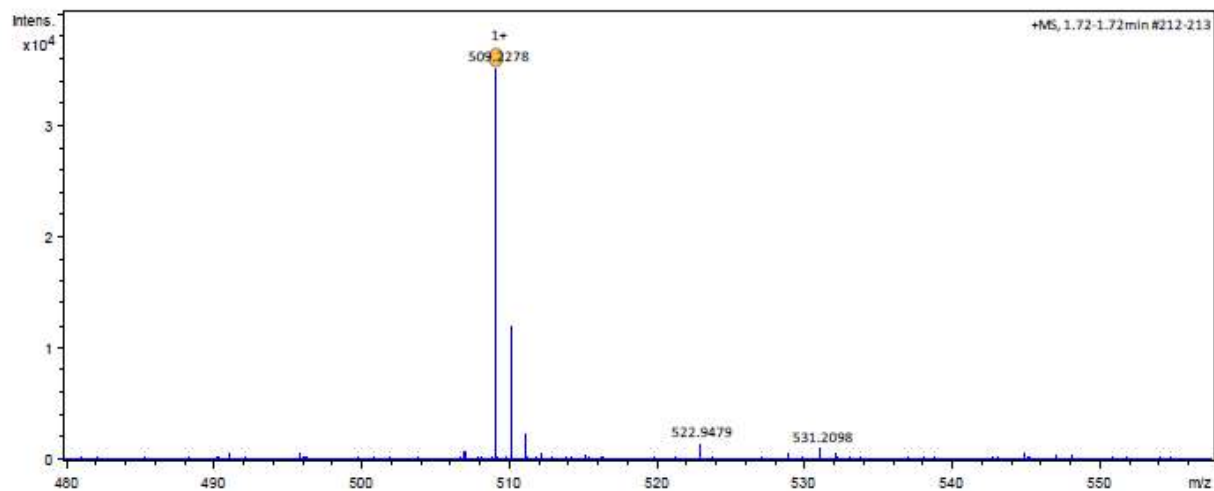

| Meas. m/z | Ion Formula                                                   | m/z      | err  [ppm] |
|-----------|---------------------------------------------------------------|----------|------------|
| 509.2278  | C <sub>28</sub> H <sub>33</sub> N <sub>2</sub> O <sub>7</sub> | 509.2282 | 0.9        |

S6. Compound **13**,  $^1\text{H}$  (600 MHz,  $\text{CDCl}_3$ )

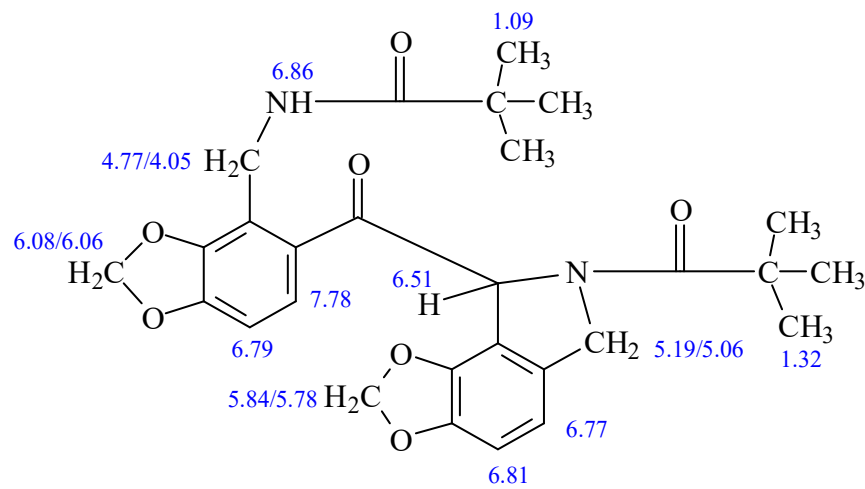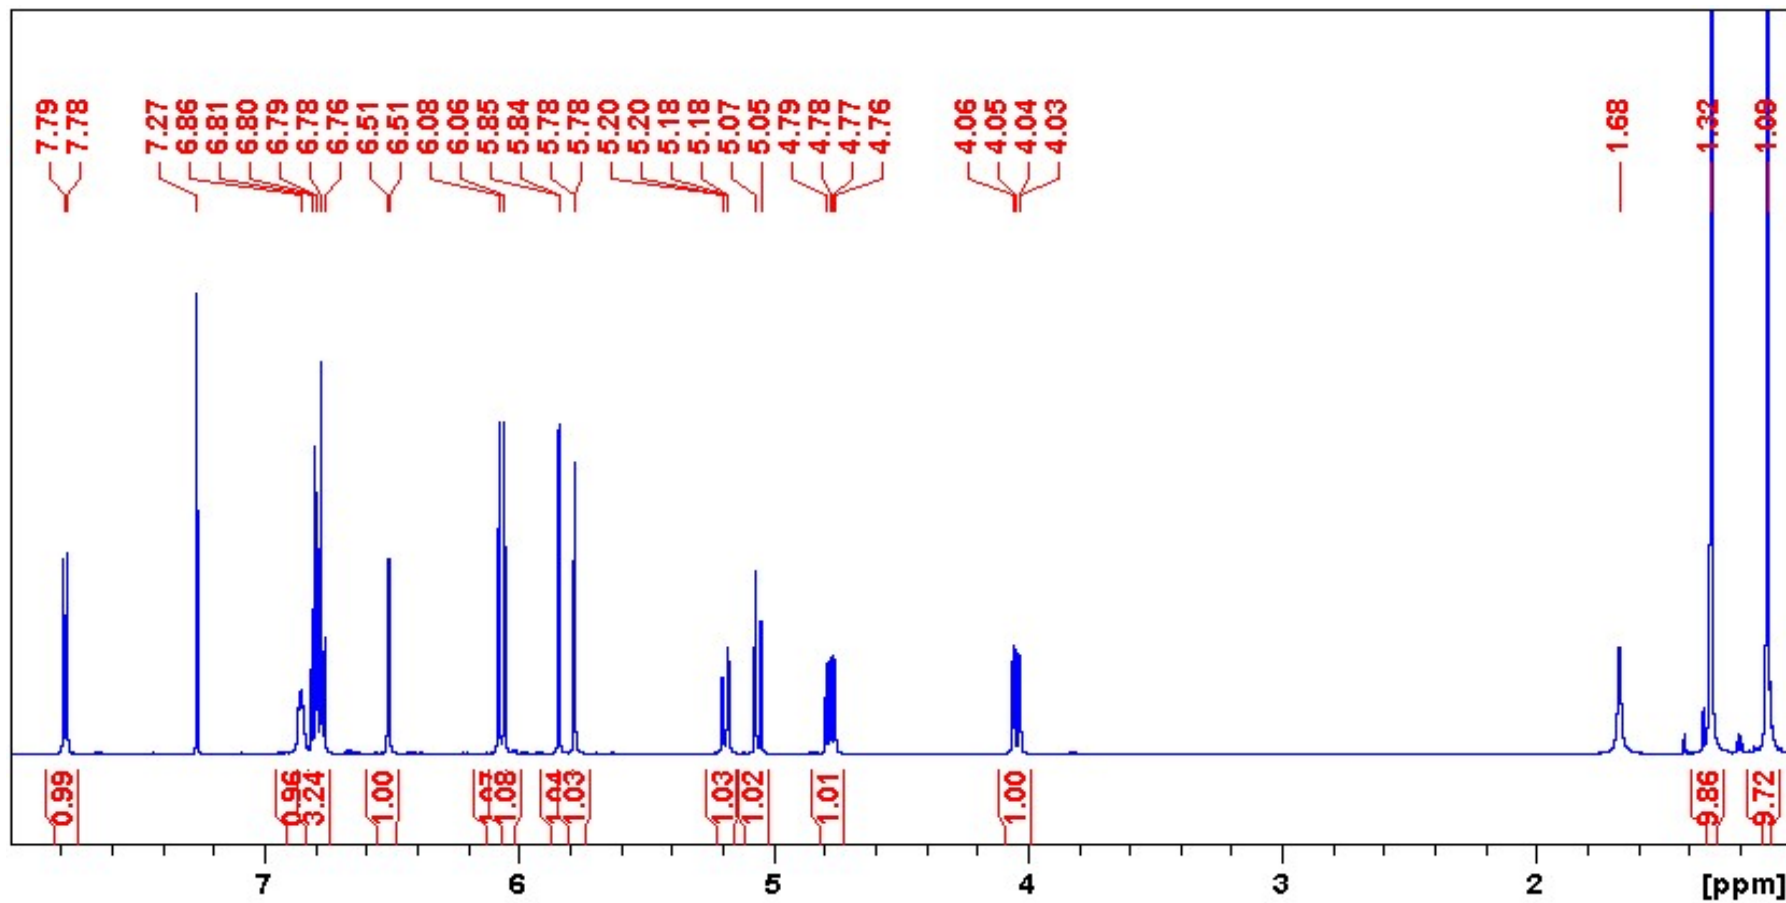

S7. Compound **13**,  $^1\text{H}$ , $^1\text{H}$ -COSY and selTOCSY

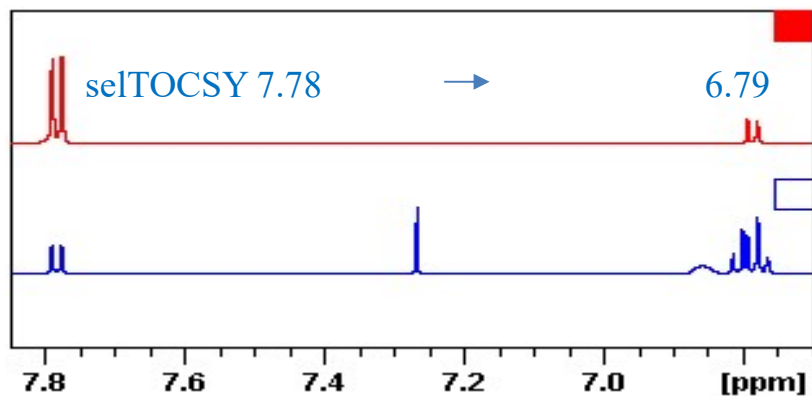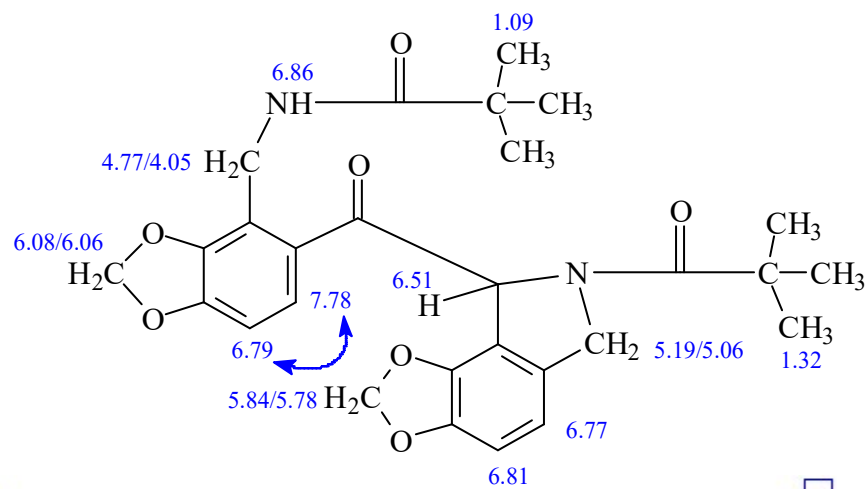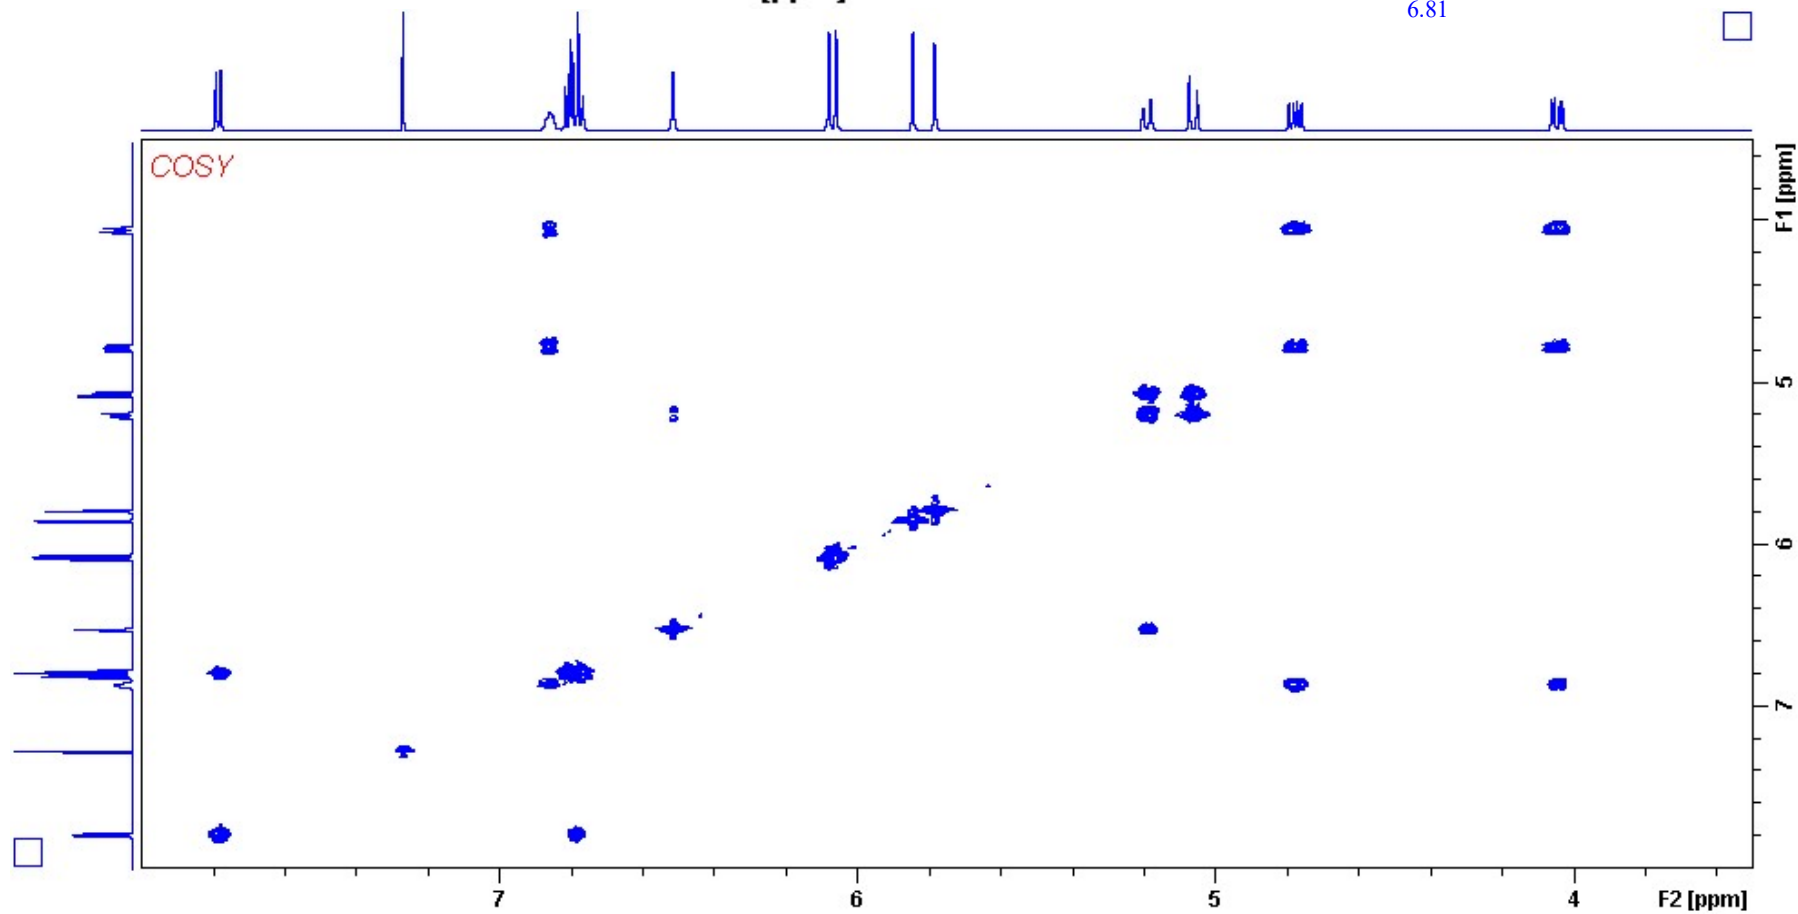

S8. Compound **13**, steric proximities detected by NOESY

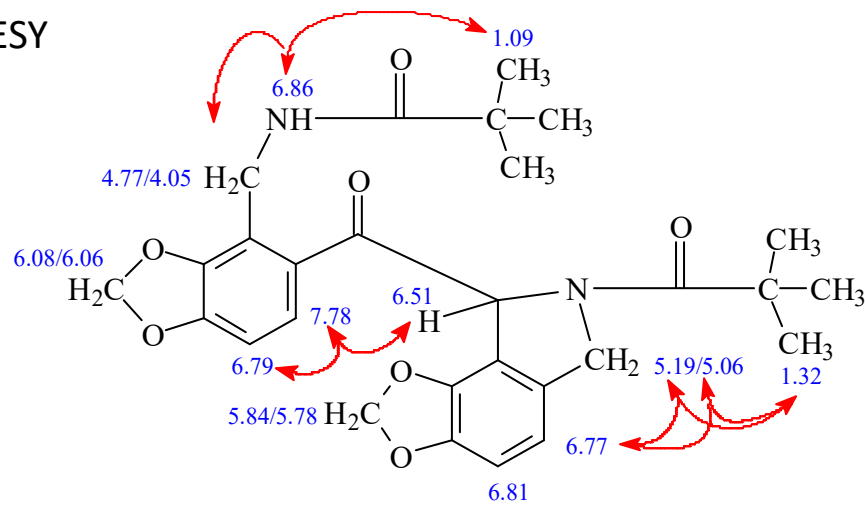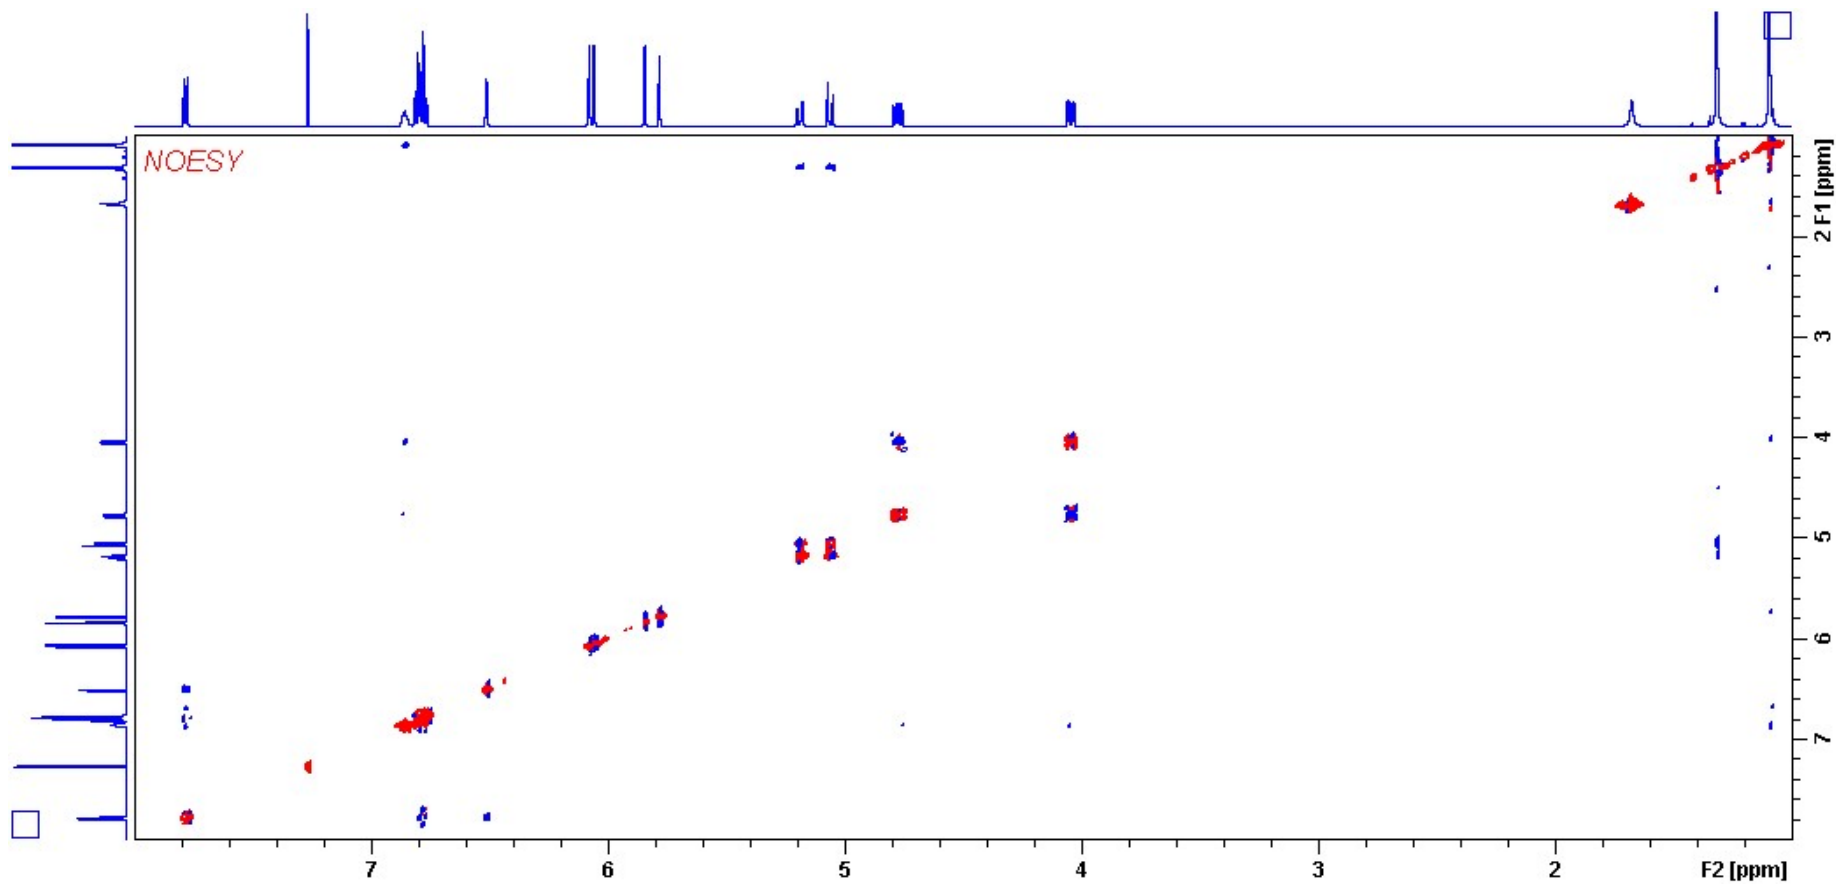



S9. Compound **13**, steric proximities detected by selNOE on signals  $\delta$  5.19, 5.06 and 6.51

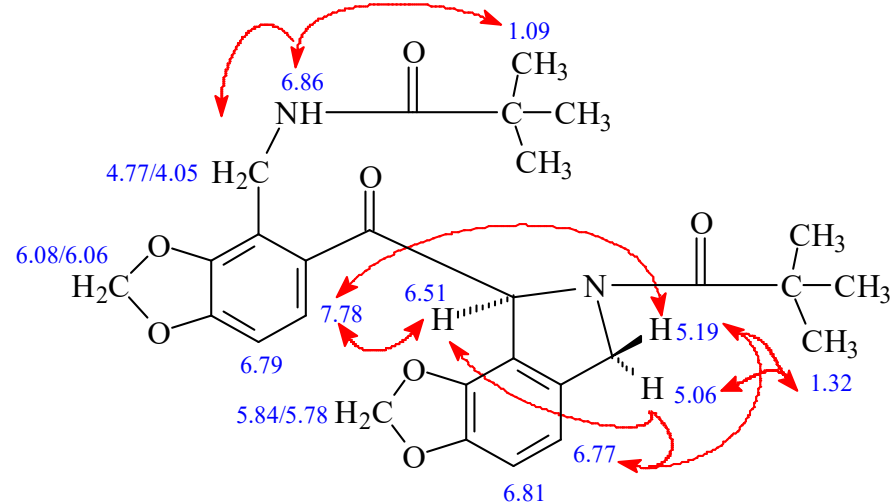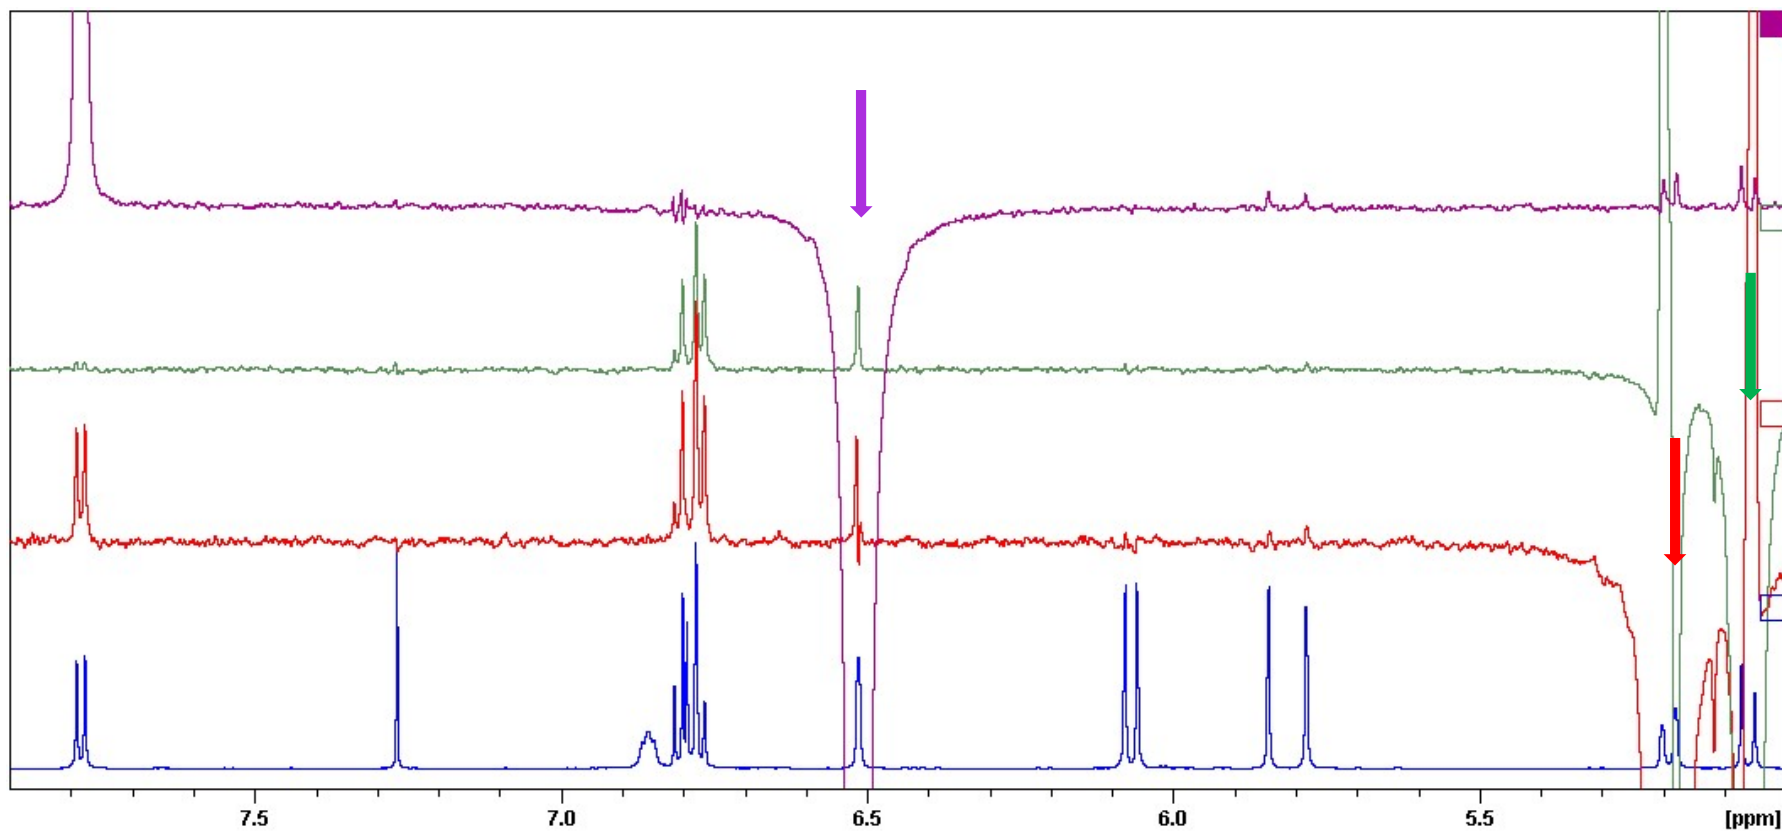

S10. Compound **13**,  $^{13}\text{C}$  and DEPT-135 (150 MHz,  $\text{CDCl}_3$ )

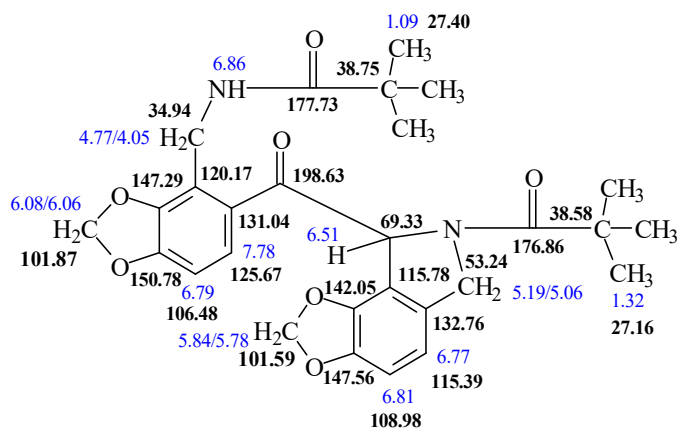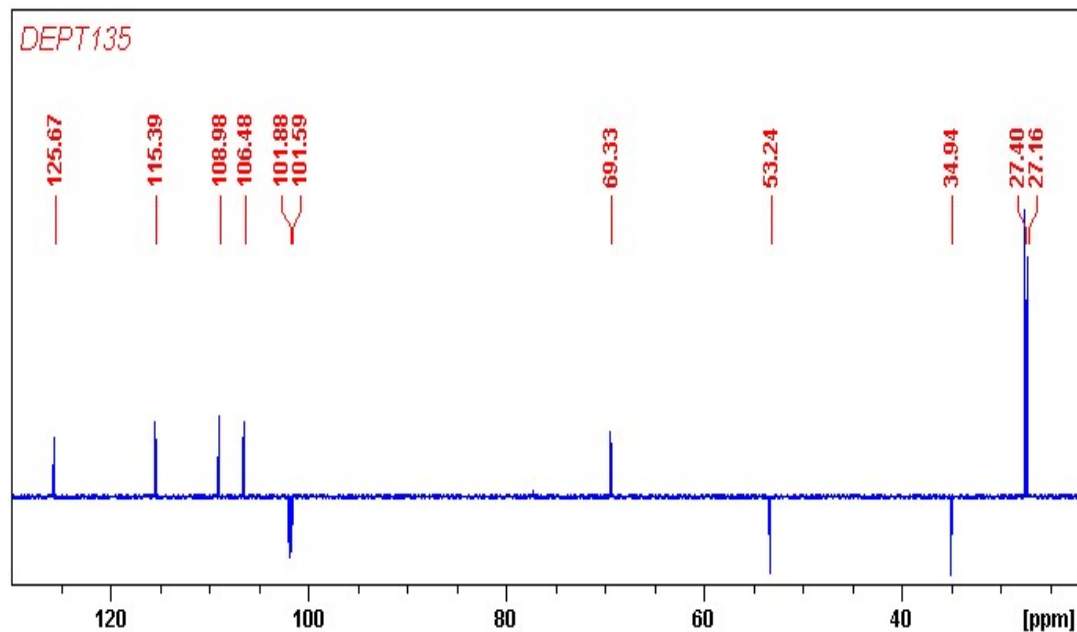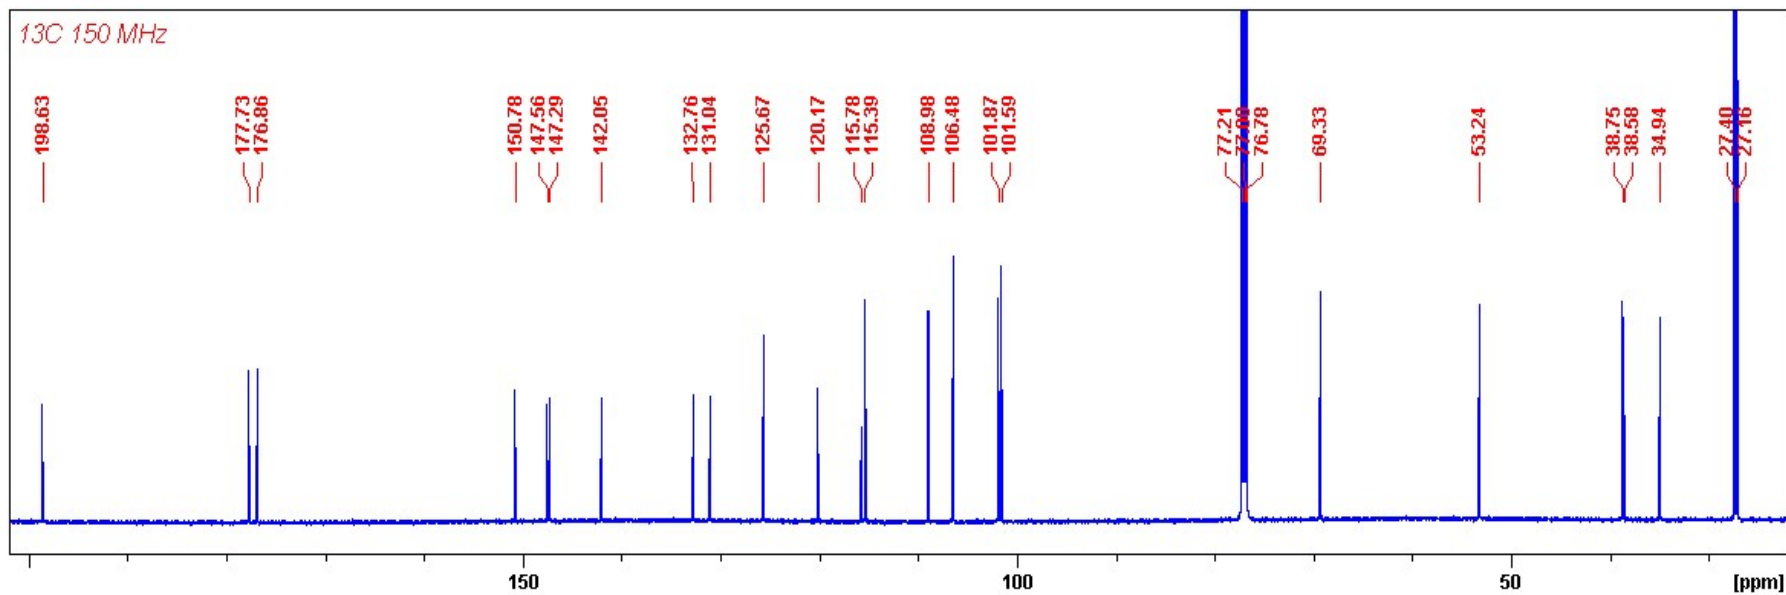

S11. Compound **13**, edHSQC and CH<sub>3</sub> section

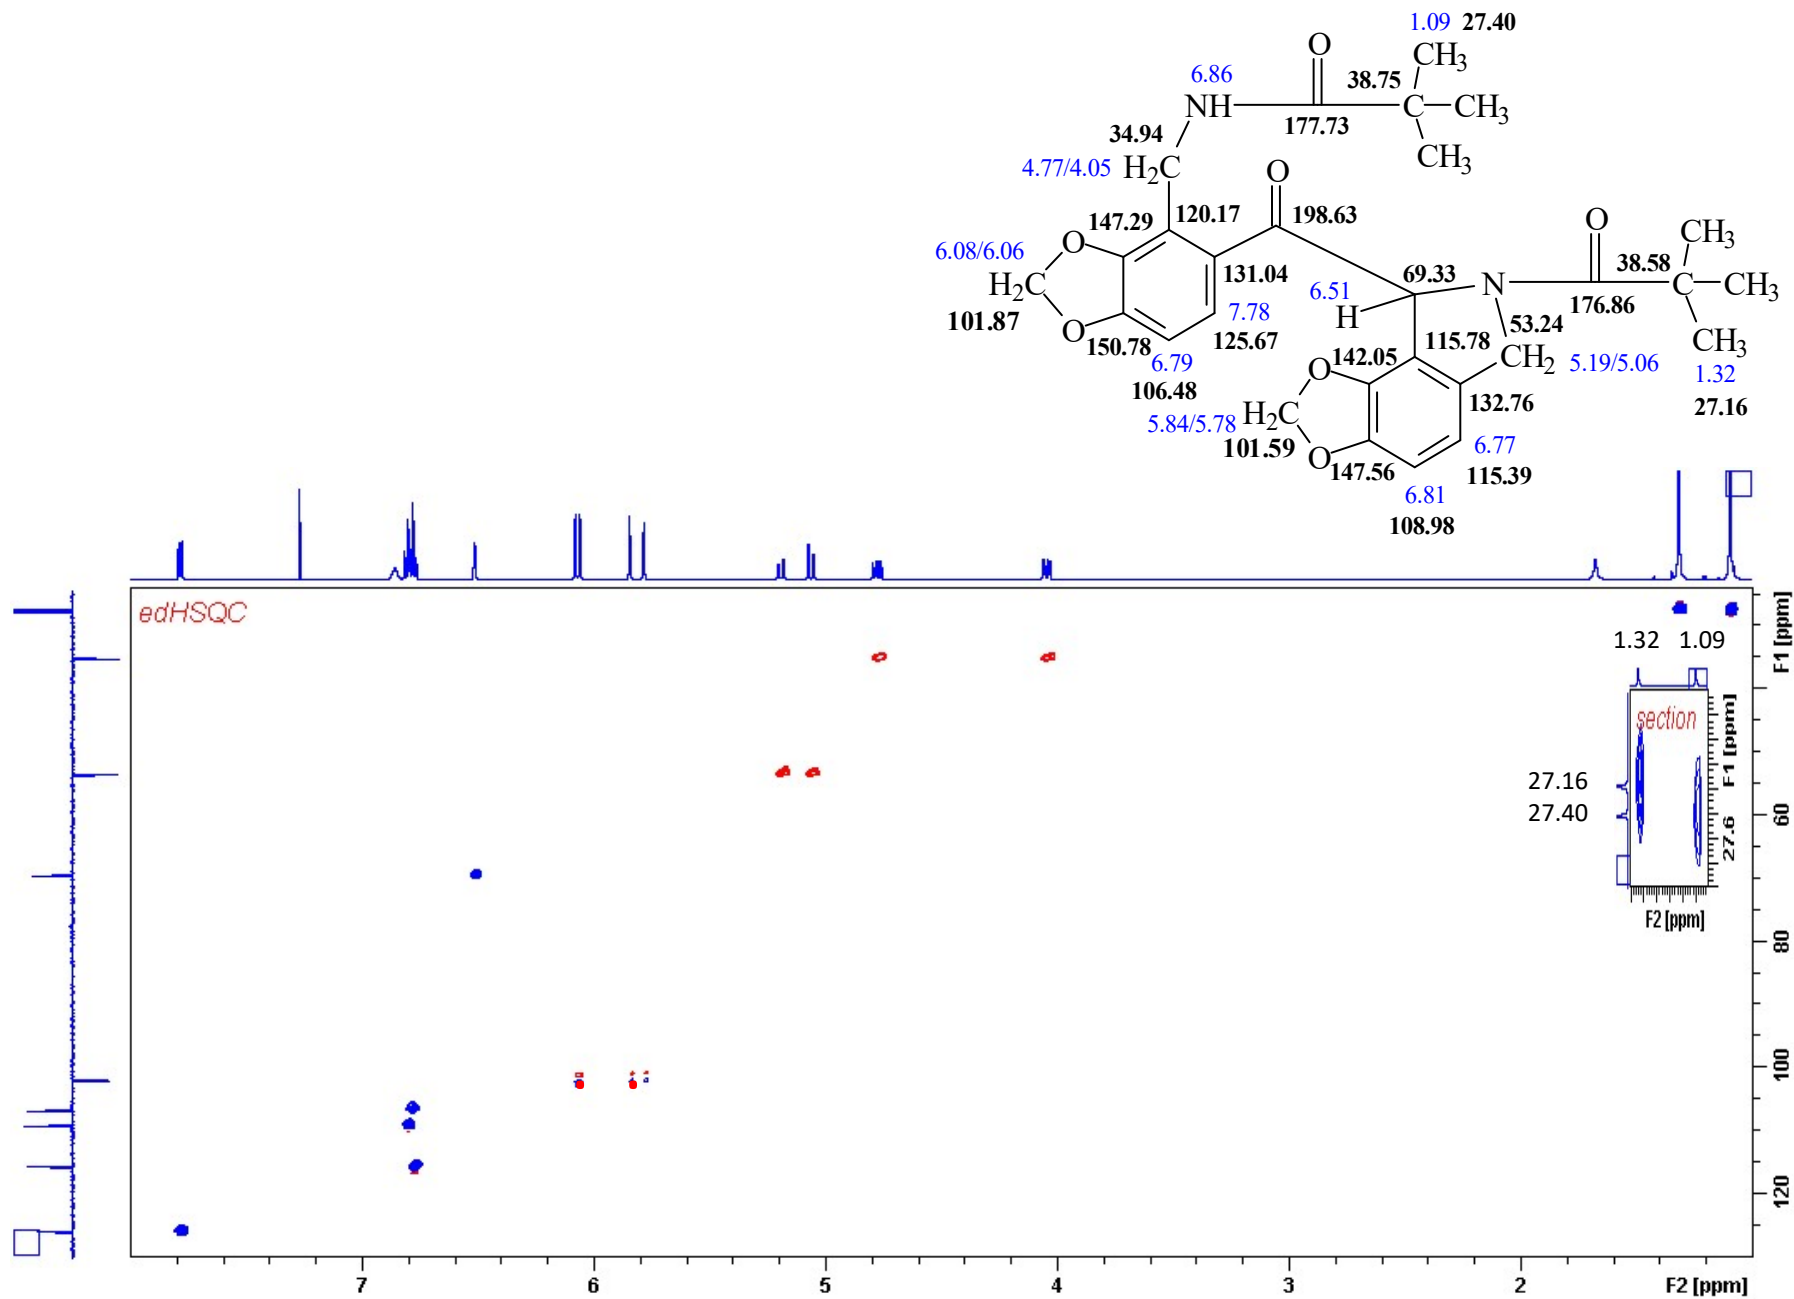

S12. Compound **13**, HMBC

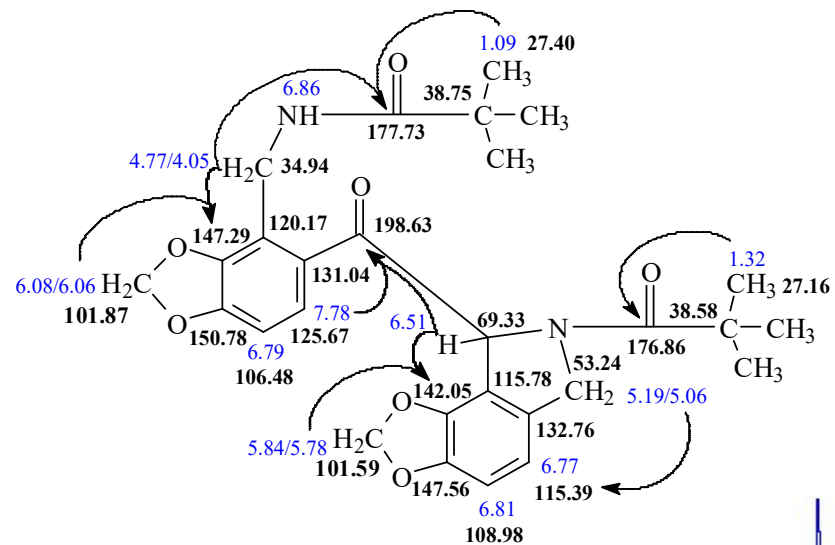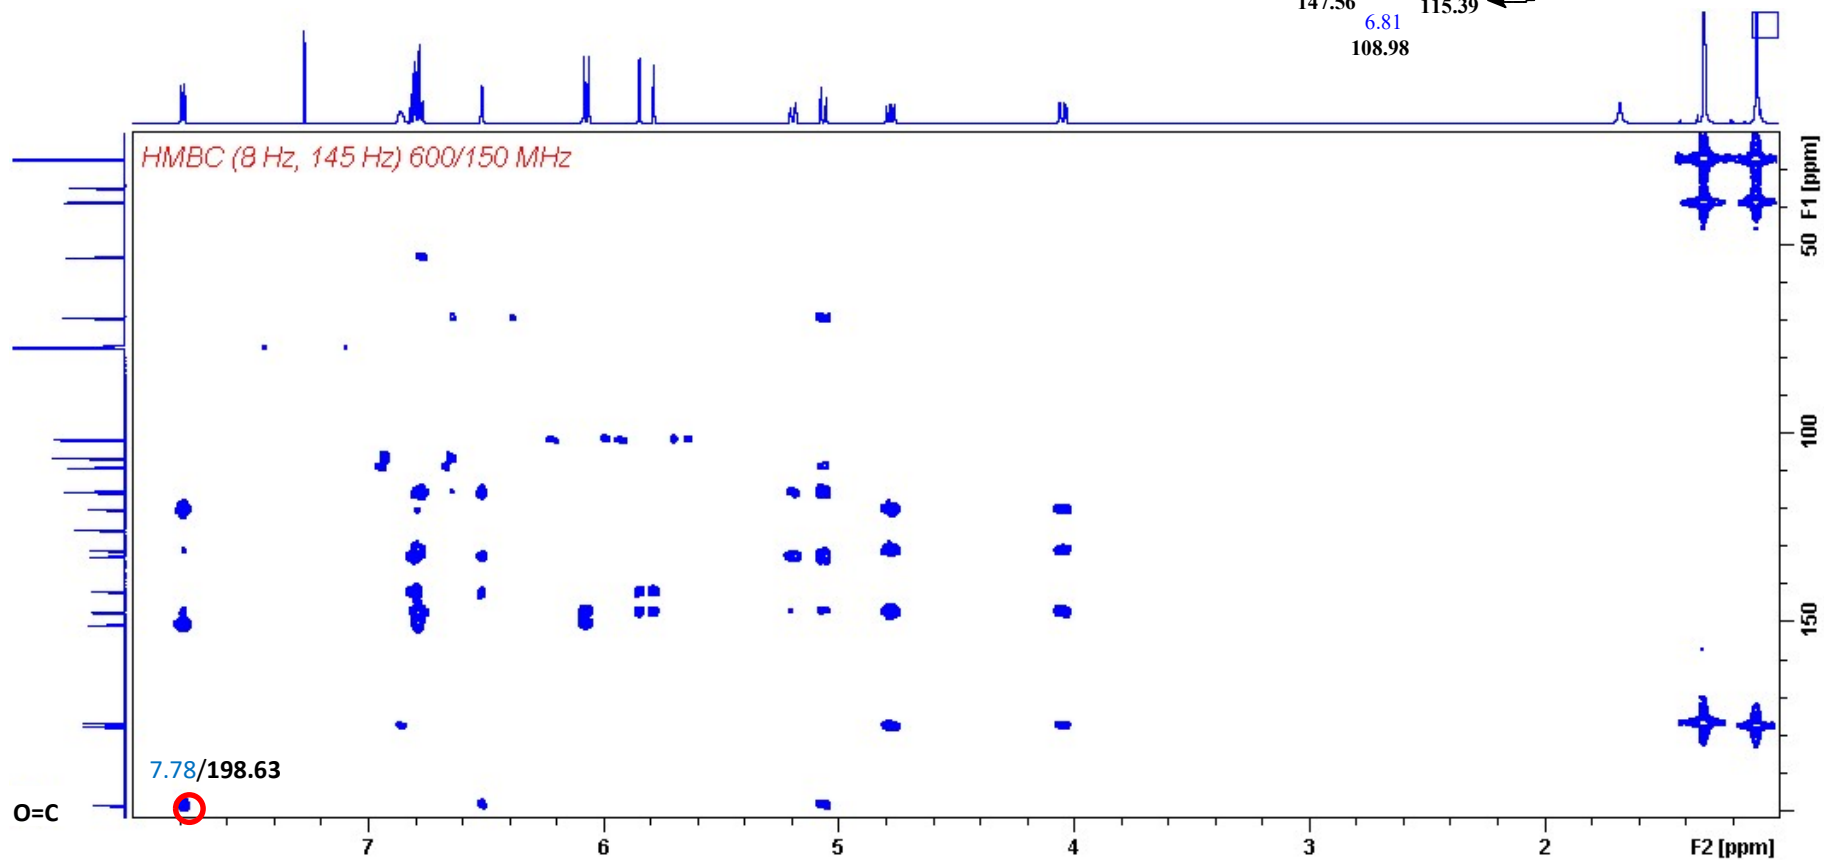

S13. Compound **13**, selective HMBC (122–114 ppm)

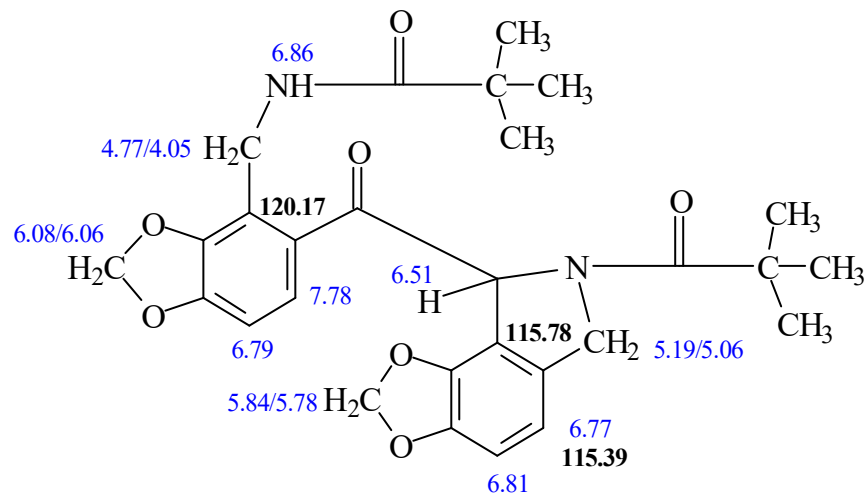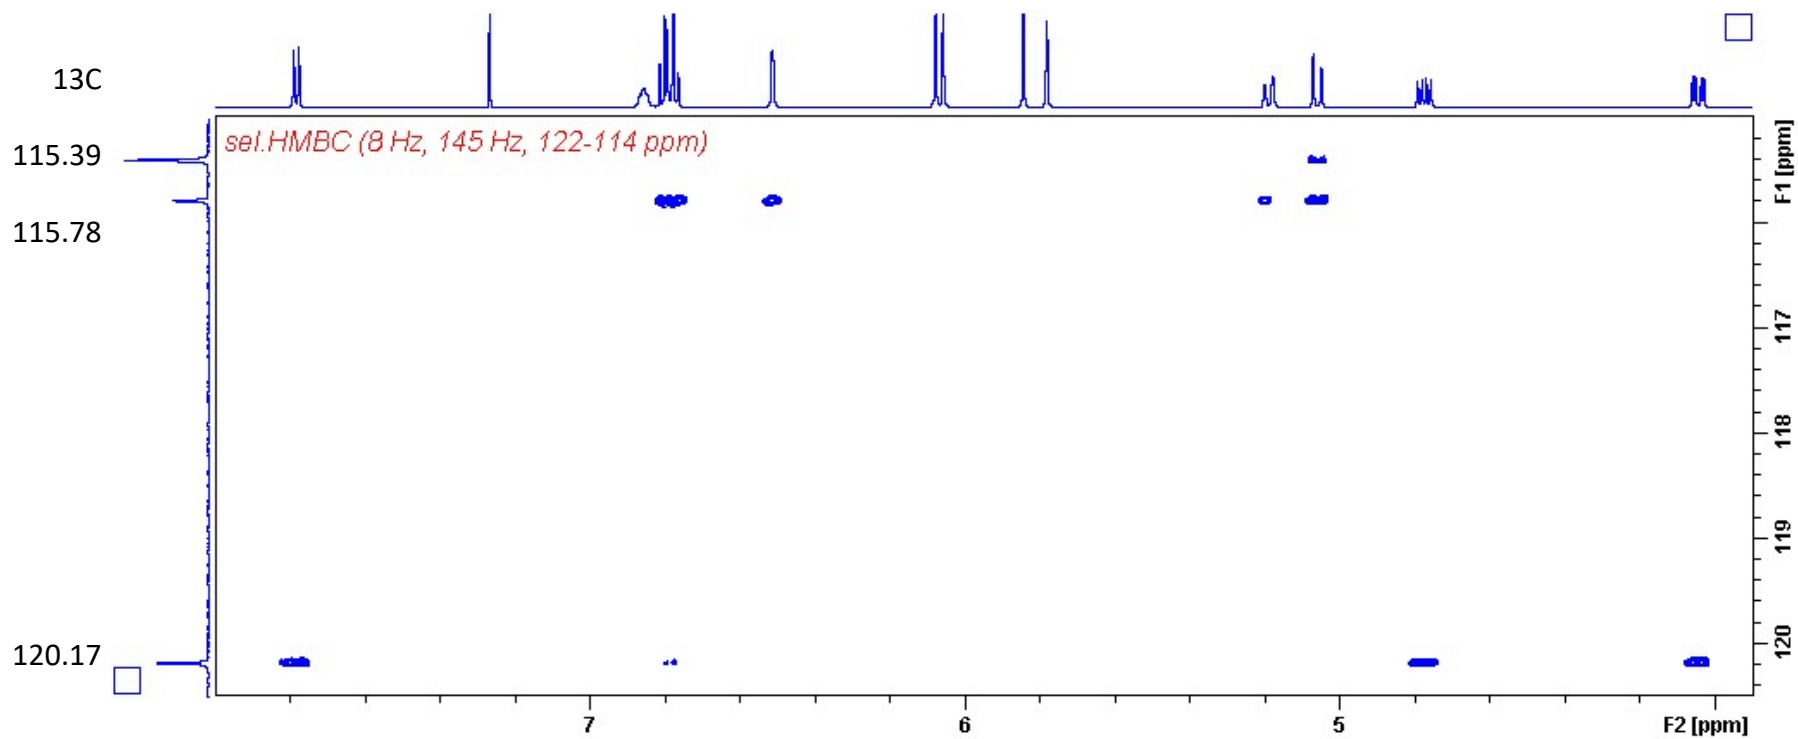

S14. Compound **13**, selective HMBC (152–141 ppm)

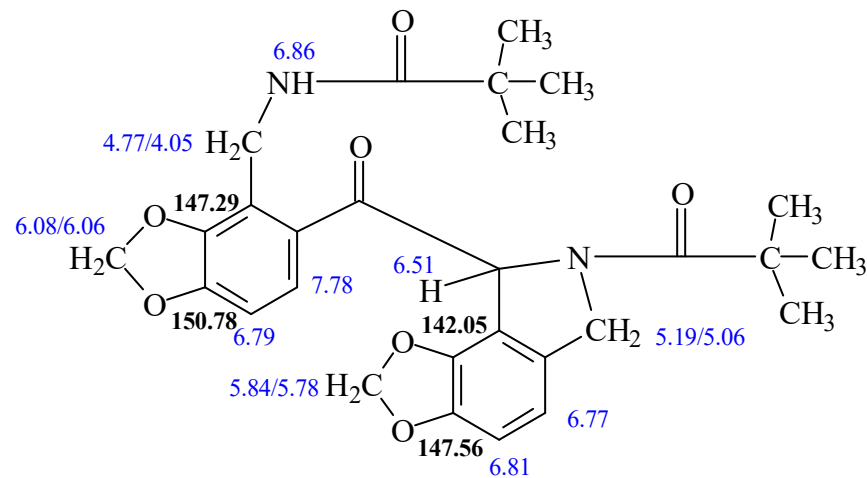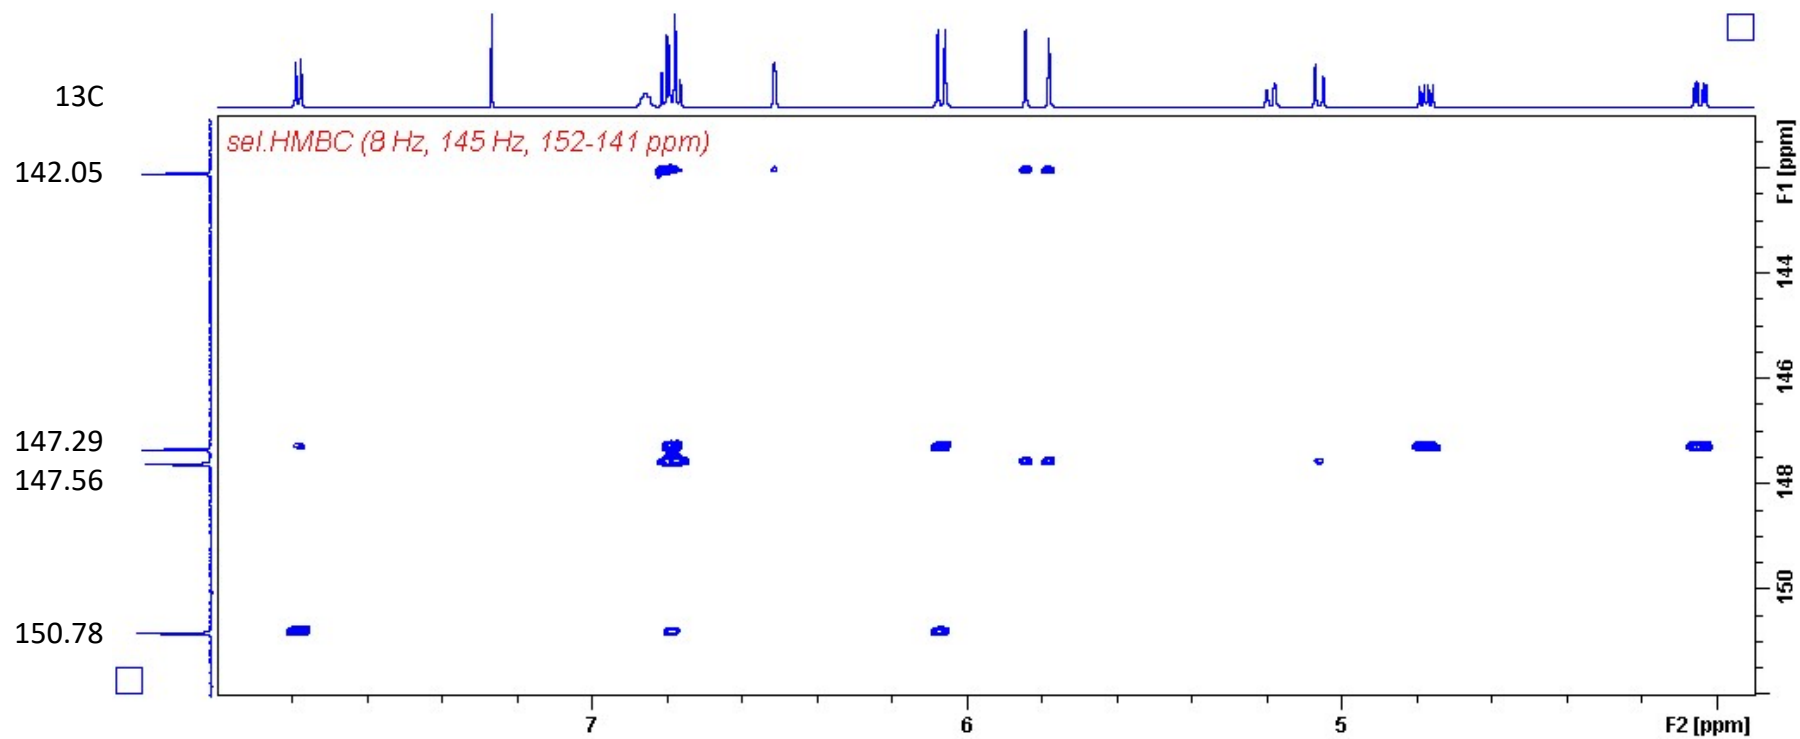

## S15. Compound **14**, description of structure determination

The molecular formula of compound **11** was established as  $C_{26}H_{32}N_2O_3$  by means of HRMS (page S16), indicating the presence of 12 double bond equivalents, meaning in this case, according to  $^1H$  and  $^{13}C$  NMR data (pages S17–S21), 3 rings and 9 double bonds. This corresponds to two phenyl groups, two pivaloyl amide moieties  $N-C=O$  ( $\delta 177.61$  and  $\delta 175.88$  ppm) and one conjugated  $C=O$  group ( $\delta 200.34$  ppm), see DEPTQ spectrum on page S16. For the aromatic  $=CH$  signals, the  $^1H$  NMR spectrum (page S17) exhibited two different four-spin systems with d; t; t; d multiplicities. The  $^1H, ^1H$ -COSY experiment (page S18) revealed the connectivity of the  $^1H$  atoms for both sets of signals. The edited HSQC spectrum (page S20) gave the unambiguous  $^1H/^{13}C$  signal assignment. Quaternary carbon signals and also the connectivity of the various structural units of the molecule were identified on the basis of the HMBC spectrum (page S21). Similarly to compound **10**, only one aromatic  $=CH$  atom ( $\delta 7.71d$ ) gave a HMBC cross-peak with the ketone  $C=O$  ( $\delta 200.34$  ppm), therefore its connection to this aromatic ring is identified, leading to a complete NMR assignment. Structure of compound **11** was also justified by single-crystal X-ray measurement.

S16. Compound **14**, HRMS

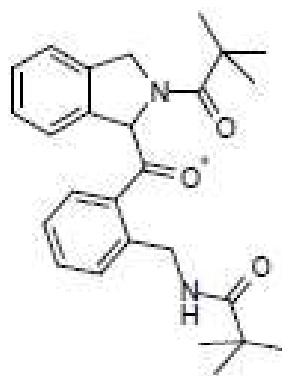

Exact Mass =421.249118  
Molecular Formula =C<sub>26</sub>H<sub>33</sub>N<sub>2</sub>O<sub>3</sub>  
HCS0484\_1E

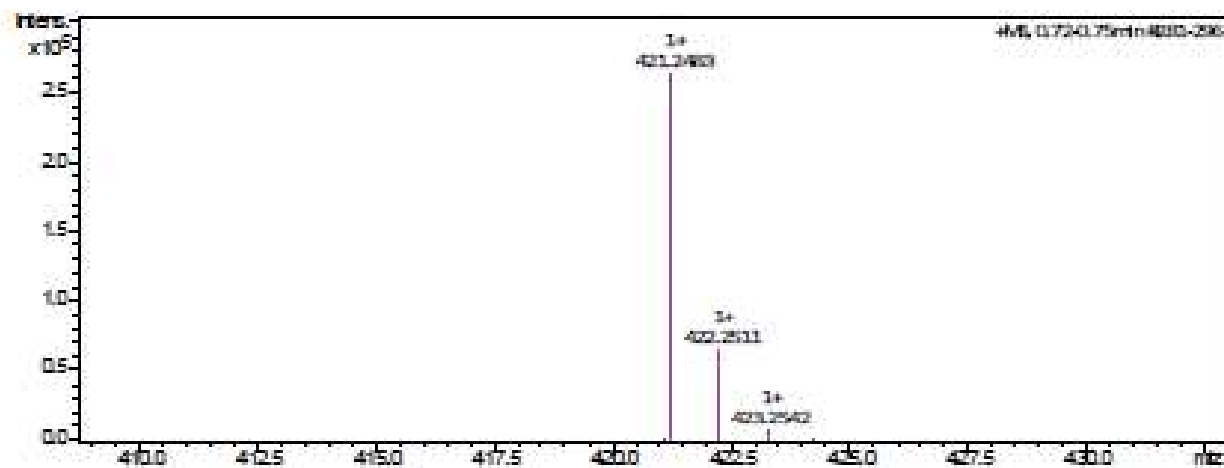

| Meas. m/z | Ion Formula                                                   | Score  | m/z      | err [ppm] |
|-----------|---------------------------------------------------------------|--------|----------|-----------|
| 421.2483  | C <sub>26</sub> H <sub>33</sub> N <sub>2</sub> O <sub>3</sub> | 100.00 | 421.2486 | 0.6       |



S17. Compound **14**,  $^1\text{H}$  NMR (600 MHz, DMSO) and Ar section

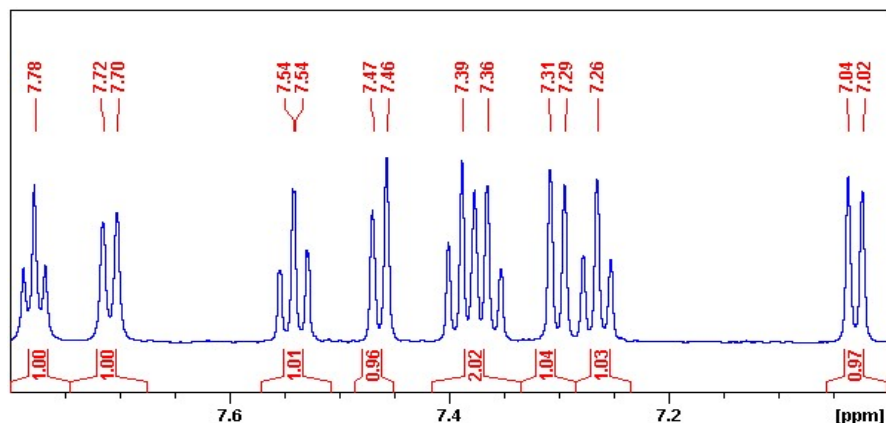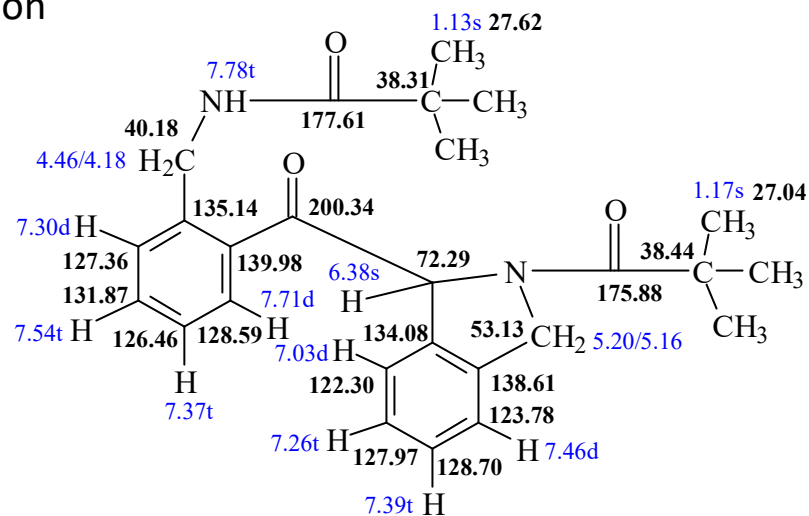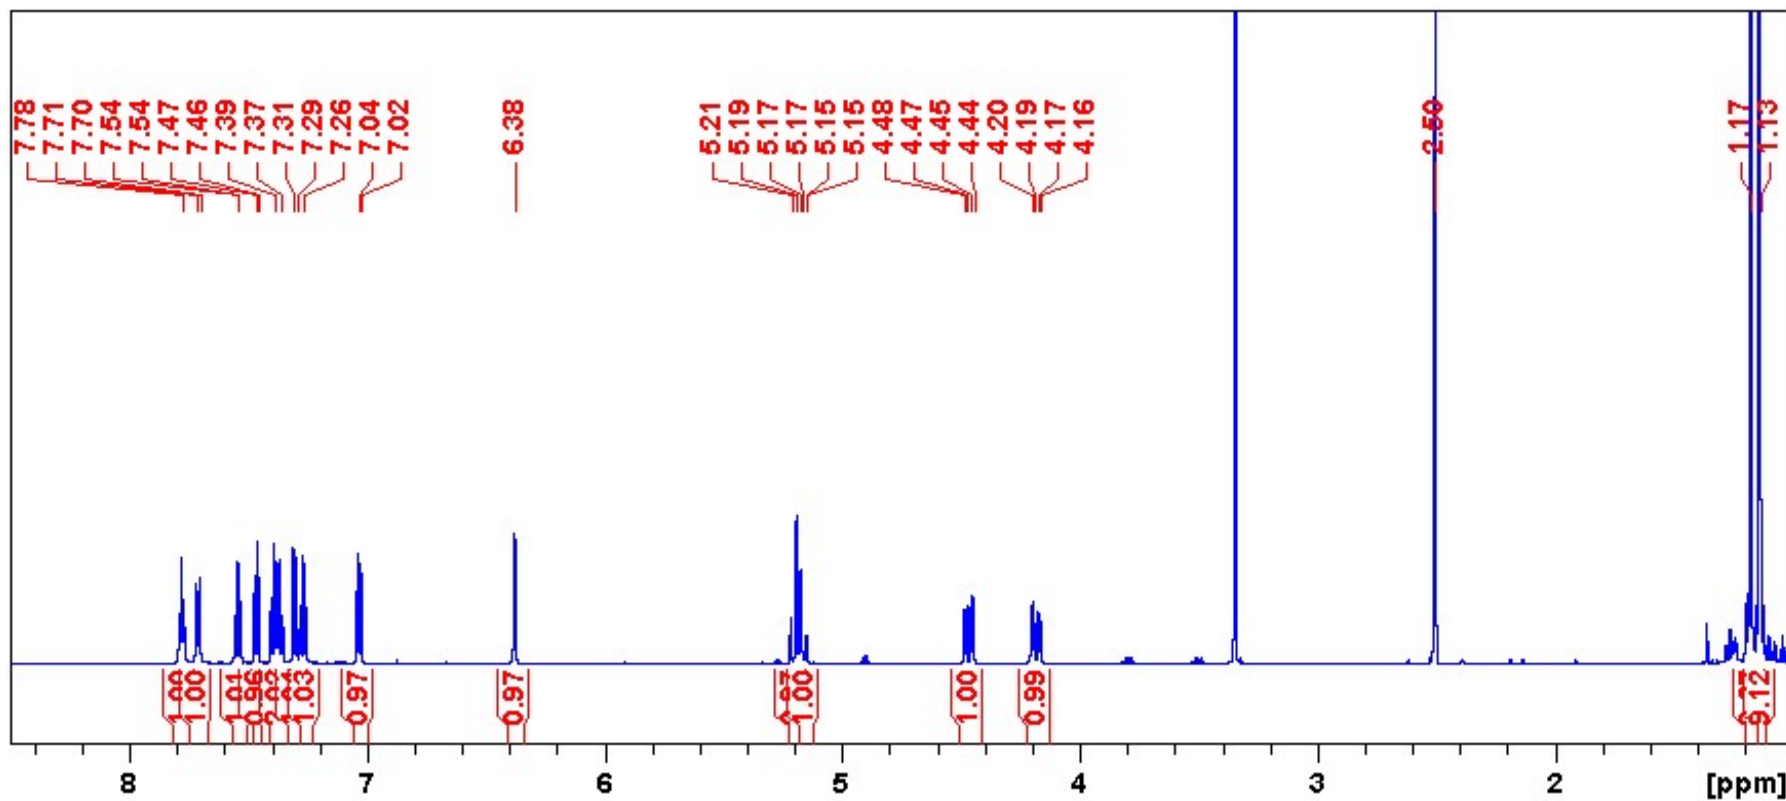

S18. Compound **14**,  $^1\text{H}$ , $^1\text{H}$ -COSY and Ar section

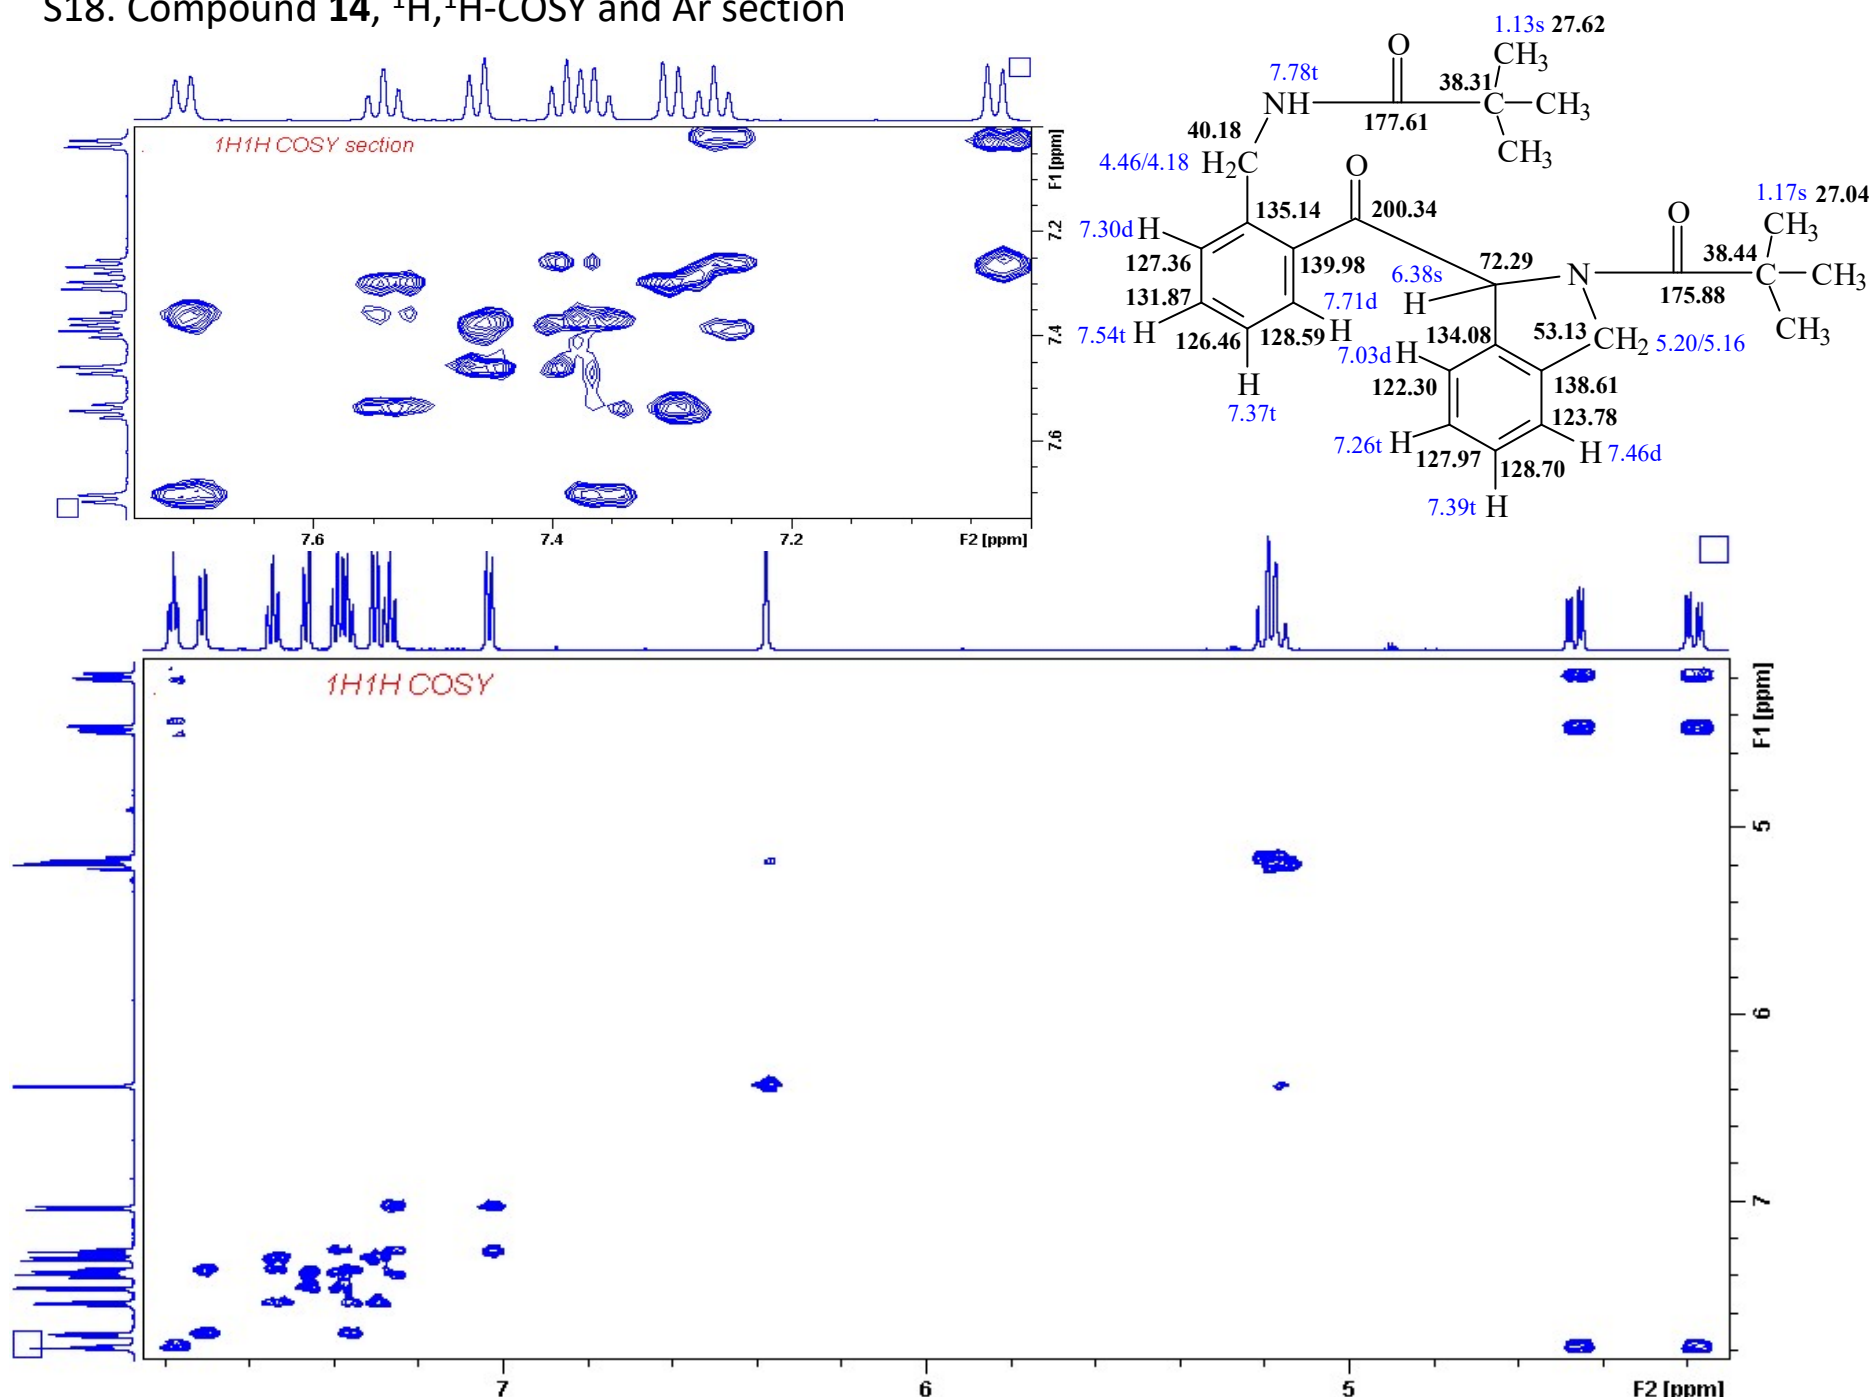

S19. Compound **14**, DEPTQ ( $^{13}\text{C}$  150 MHz)

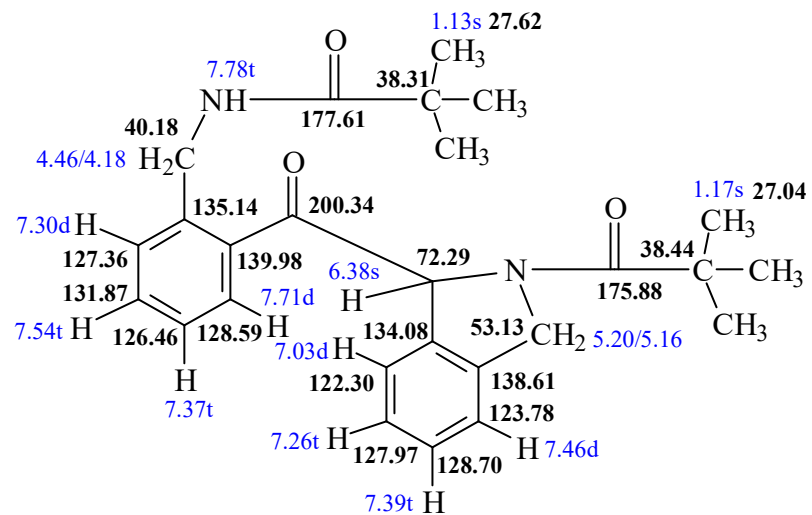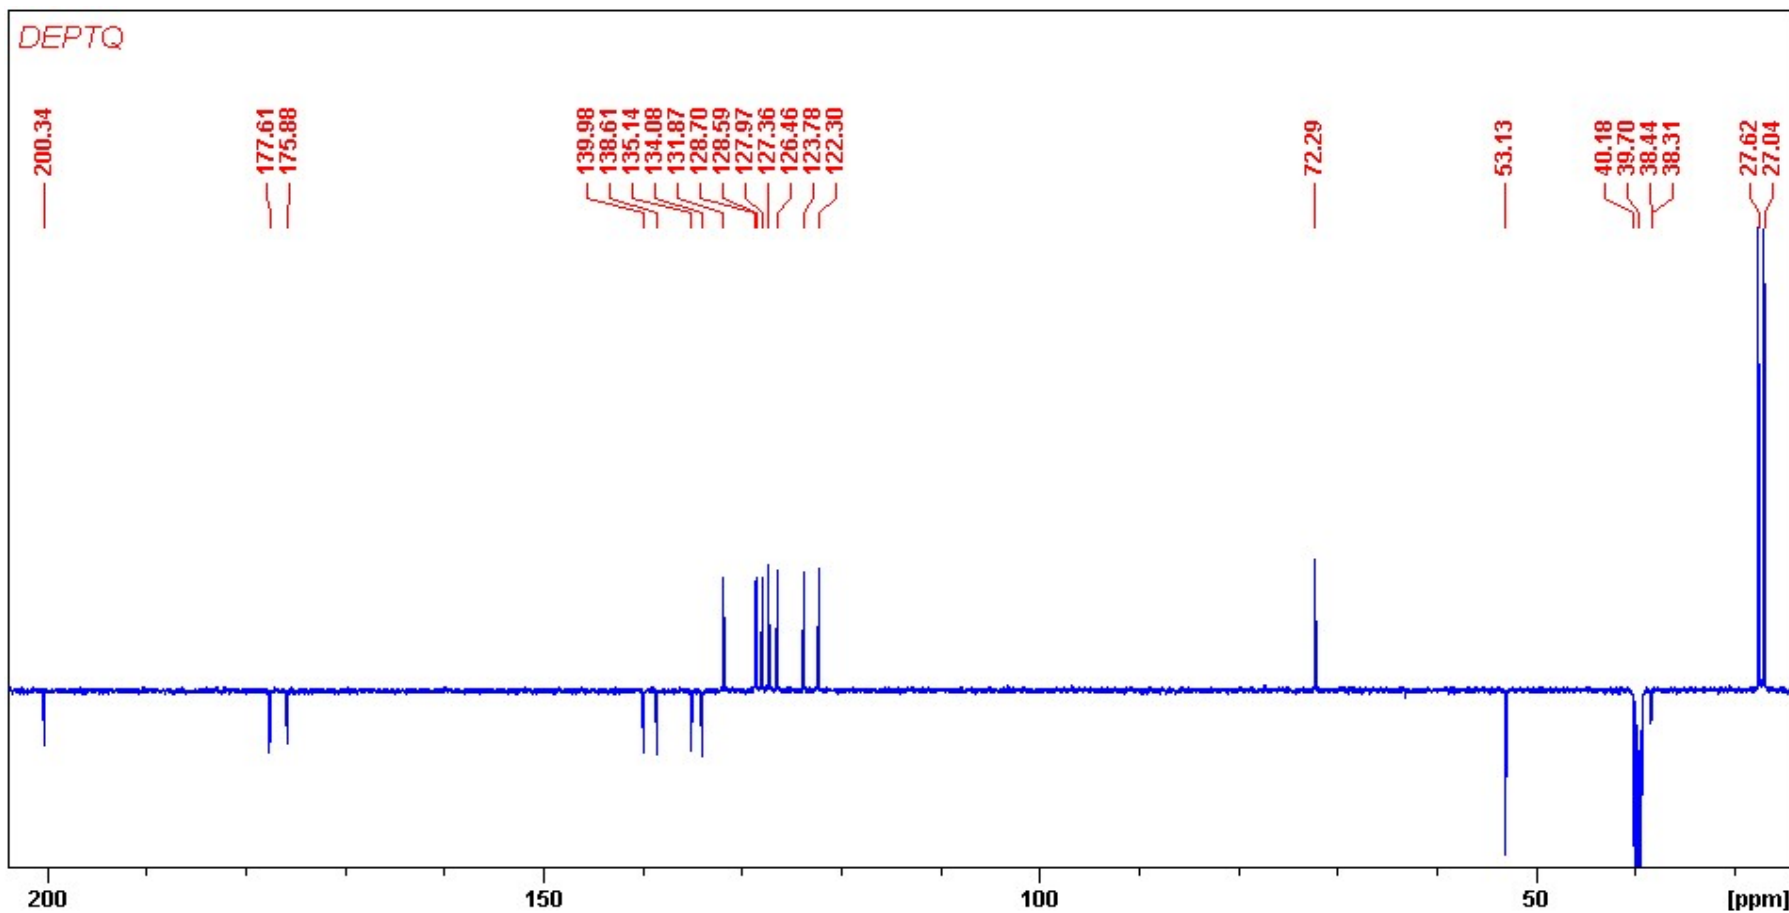

S20. Compound **14**, edHSQC and Ar section

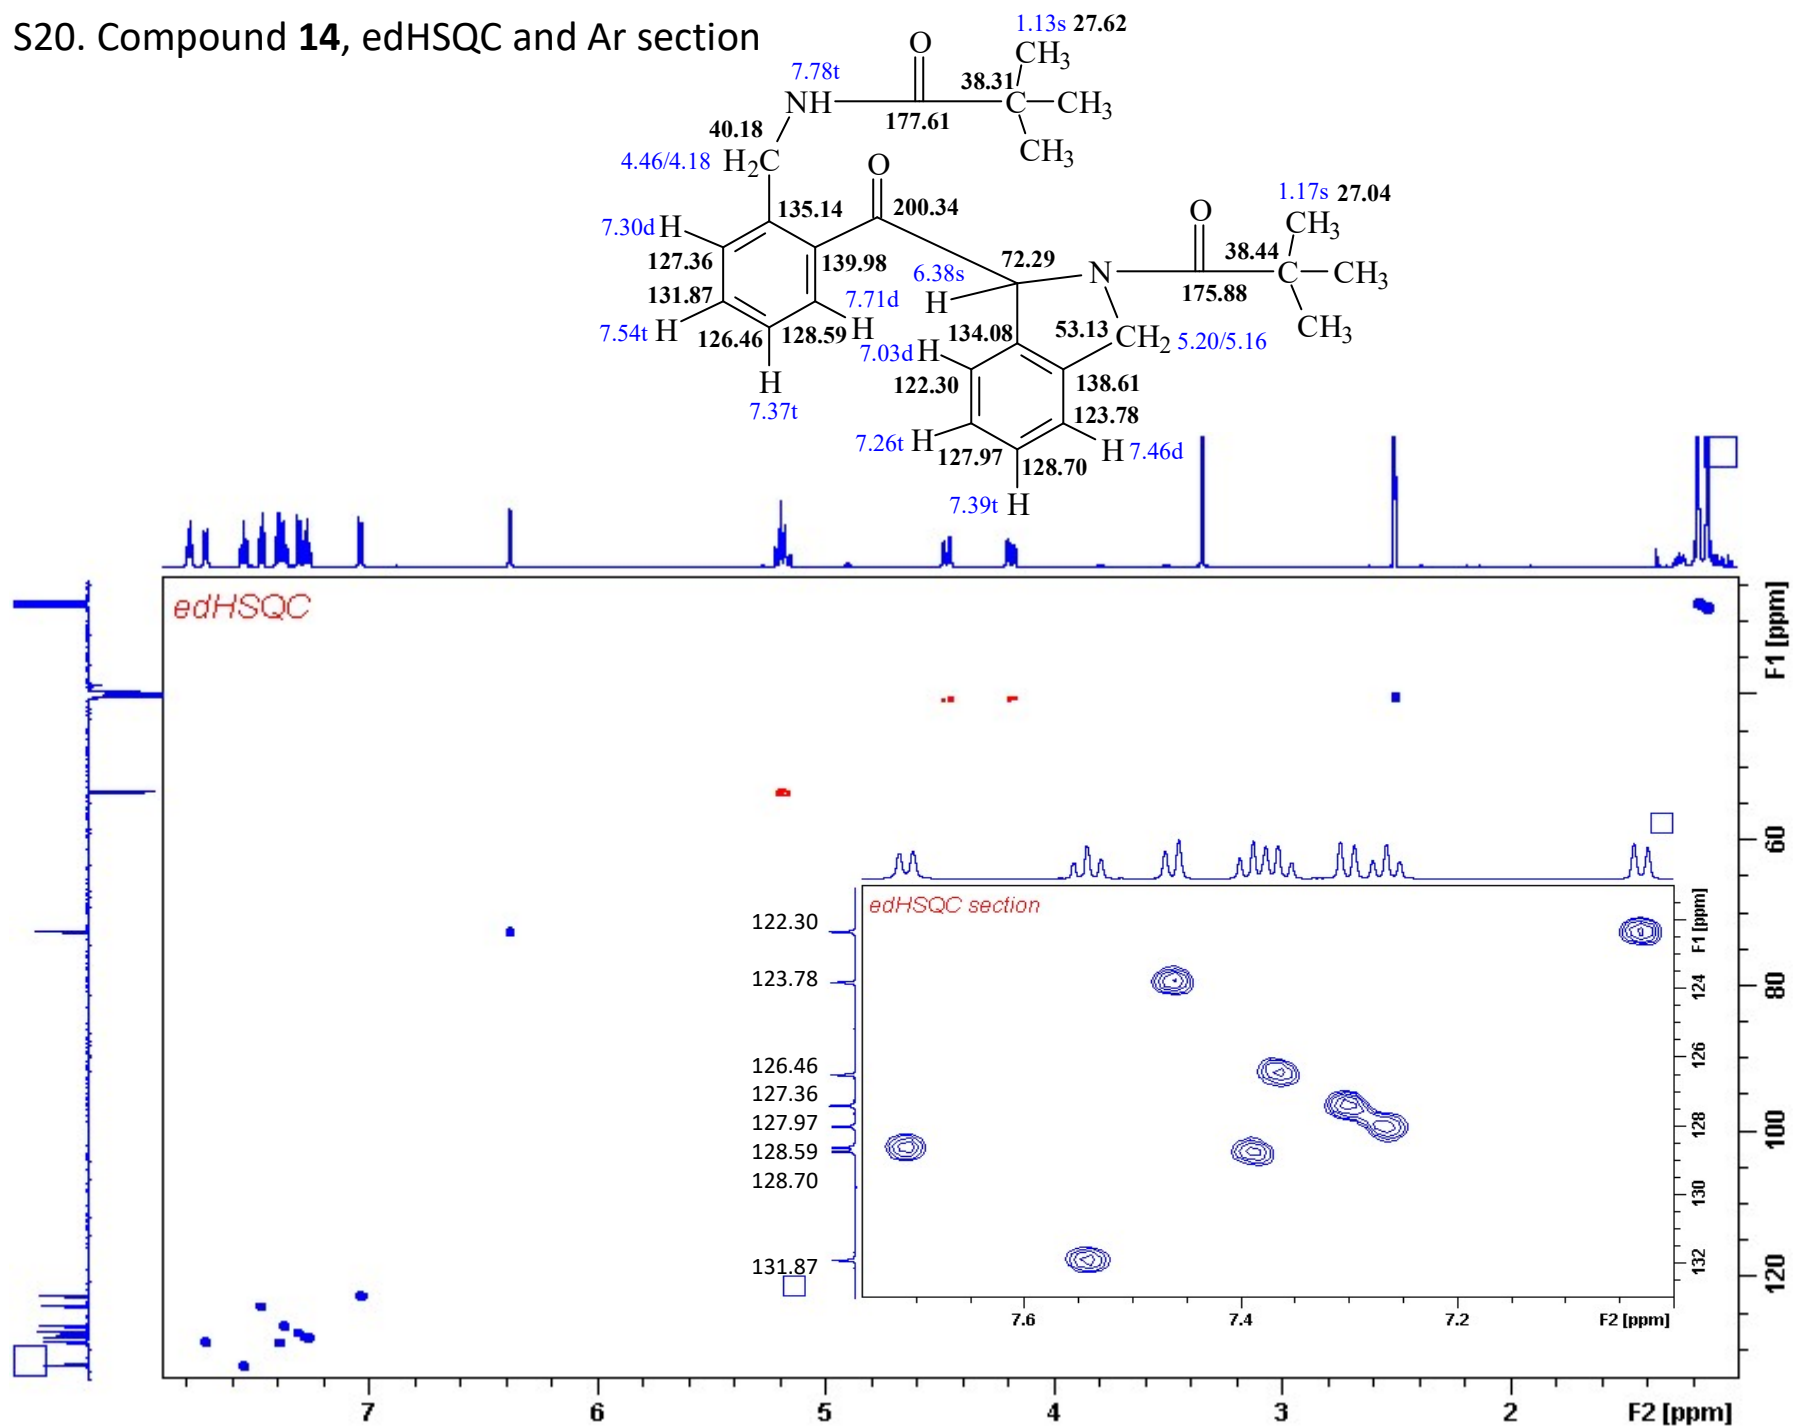

S21. Compound **14**, HMBC and CH<sub>3</sub> sections

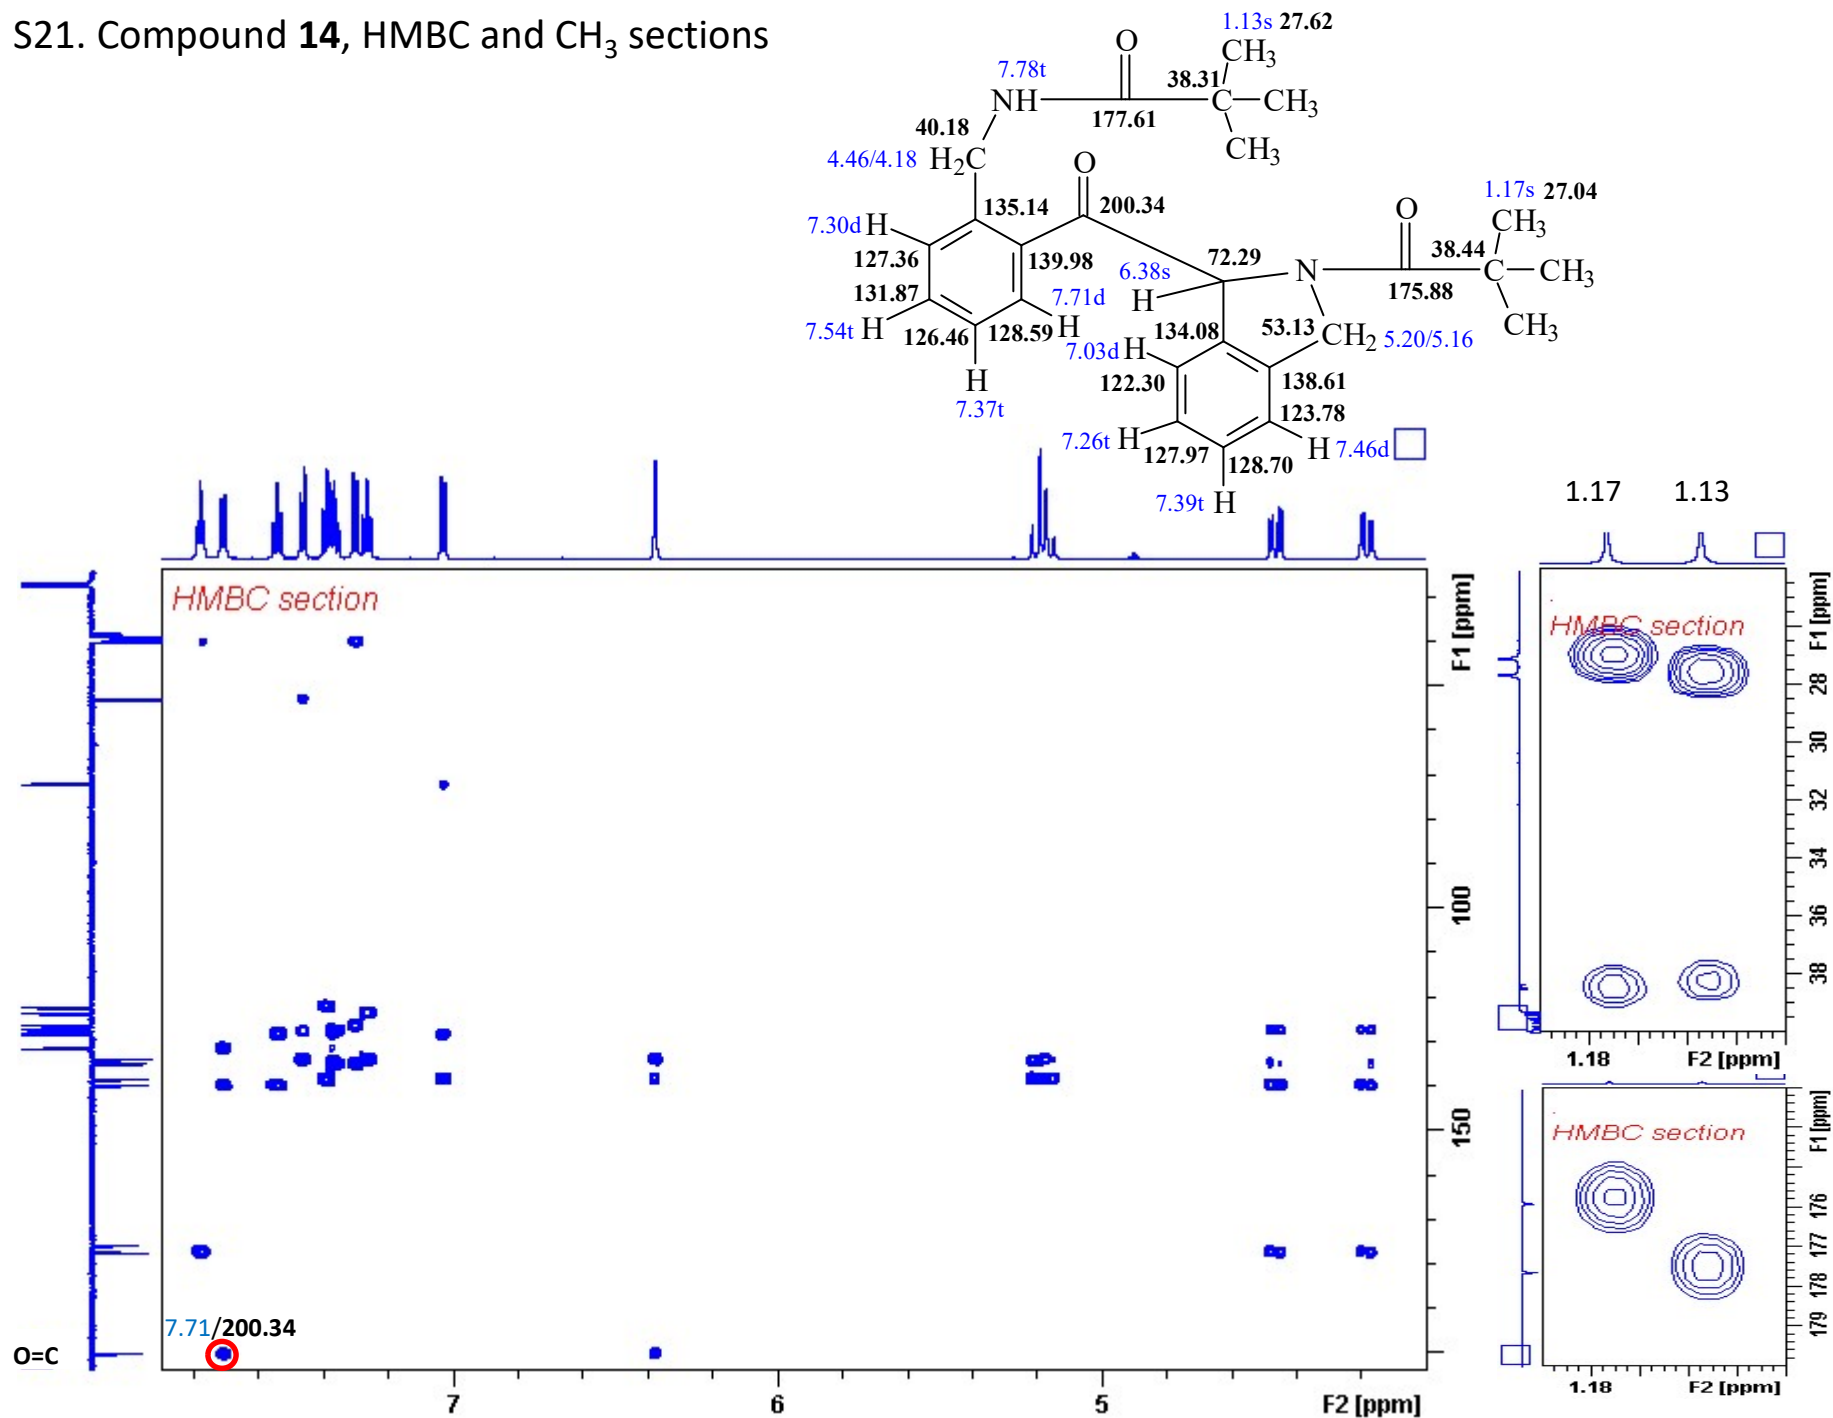

## S22. Compound **15**, description of structure determination

The structural formula of compound **12** was established as  $C_{21}H_{21}NO_2$  by means of HRMS (page S23), i.e. this compound contains 12 double bond equivalents. Taking into consideration the  $^1H$  and  $^{13}C$  NMR data (page S24), this compound contains 3 rings and 9 double bonds. This corresponds to two phenyl groups, one pivaloyl amide unit  $N-C=O$  ( $\delta$ 177.42 ppm), one cross-conjugated  $C=O$  group ( $\delta$ 196.58 ppm) and one conjugated  $C=CH$  moiety ( $\delta$ 136.81 and  $\delta$ 147.02 ppm), see page S24 ( $^{13}C$  spectrum). The character of the third ring was determined by HMBC (see below). The selTOCSY experiment (page S25) on  $=CH$   $\delta$ 7.49t (7.4 Hz) revealed the four-spin system 7.27d; 7.49t; 7.31t and 7.44d, i.e. the signals of the condensed phenyl ring. SelTOCSY (page S25) on  $=CH$   $\delta$ 7.36t (7.4 Hz) showed a second four-spin system 7.30d; 7.36t; 7.30t and 7.26d for the *ortho*-disubstituted phenyl group. Unambiguous identification of the aromatic rings was based on the ROESY experiment (page S26). The  $\delta$ NCH<sub>2</sub> (4.29d ppm) signal showed a steric proximity to  $=CH$   $\delta$ 7.30d, marking this spin system as a sterically close one, and also to the single  $=CH$  ( $\delta$ 7.81s ppm) hydrogen atom. Furthermore, the signal  $\delta$ 7.81s resulted in a NOE response on  $\delta$ 7.27d and thereby revealed the location of the other four-spin system (7.27d; 7.49t; 7.31t and 7.44d) in the condensed 1-oxo-1*H*-indene moiety. The HSQC experiment (page S27) served as the unambiguous  $^1H/^{13}C$  signal assignment in case of very close, even partly overlapping  $=CH$  signals. To facilitate the evaluation of the HSQC, we have inserted into this spectrum the one-dimensional selTOCSY spectrum with irradiation on  $\delta$ 7.36t (page S27). The TOCSY signals exactly picked out the corresponding C-H cross-peaks. The assignment of quaternary carbon atoms and the connectivity of the structural elements of the molecule were supported by HMBC measurements (page S28). Cross-peaks of the  $C=O$  signal (196.58 ppm) with the  $\delta$ 7.81s and  $\delta$ 7.44d hydrogens disclosed its position. The occasionally appearing doublet at  $\delta$ 147.02 ppm gave a coupling of  $^1J(CH)=173$  Hz. The CH<sub>2</sub> hydrogens ( $\delta$ 4.29d) resulted in HMBC responses on the aromatic carbon atoms at 127.48, 130.27 and 138.81 ppm, and provided an independent evidence for the differentiation and assignment of the disubstituted aromatic rings. By taking advantage of the extremely high  $^{13}C$  chemical shift resolution of the band-selective version of HMBC (page S29), a complete NMR assignment was finally achieved.

S23. Compound **15**, HRMS

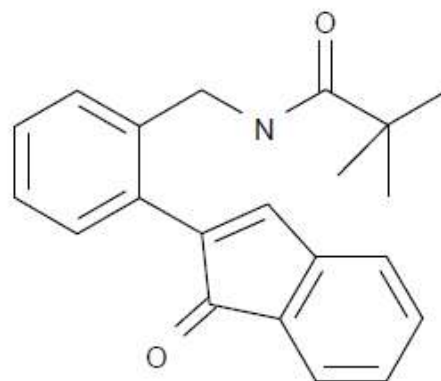

MH<sup>+</sup>: 320.1651  
C<sub>21</sub>H<sub>22</sub>NO<sub>2</sub>

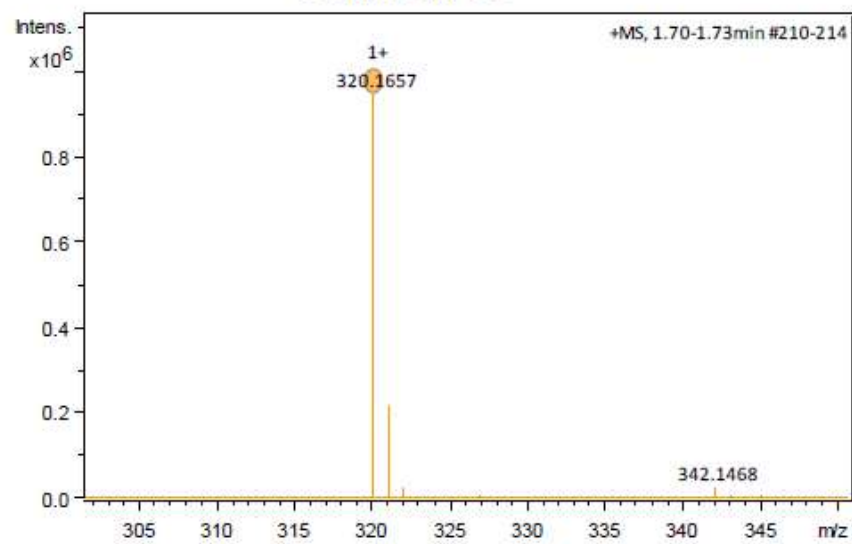

| Meas. m/z | Ion Formula                                     | m/z      | err [ppm] |
|-----------|-------------------------------------------------|----------|-----------|
| 320.1657  | C <sub>21</sub> H <sub>22</sub> NO <sub>2</sub> | 320.1645 | -3.8      |

S24. Compound **15**,  $^1\text{H}$  NMR (600 MHz) and  $^{13}\text{C}$  NMR (150 MHz) in  $\text{DMSO-}d_6$

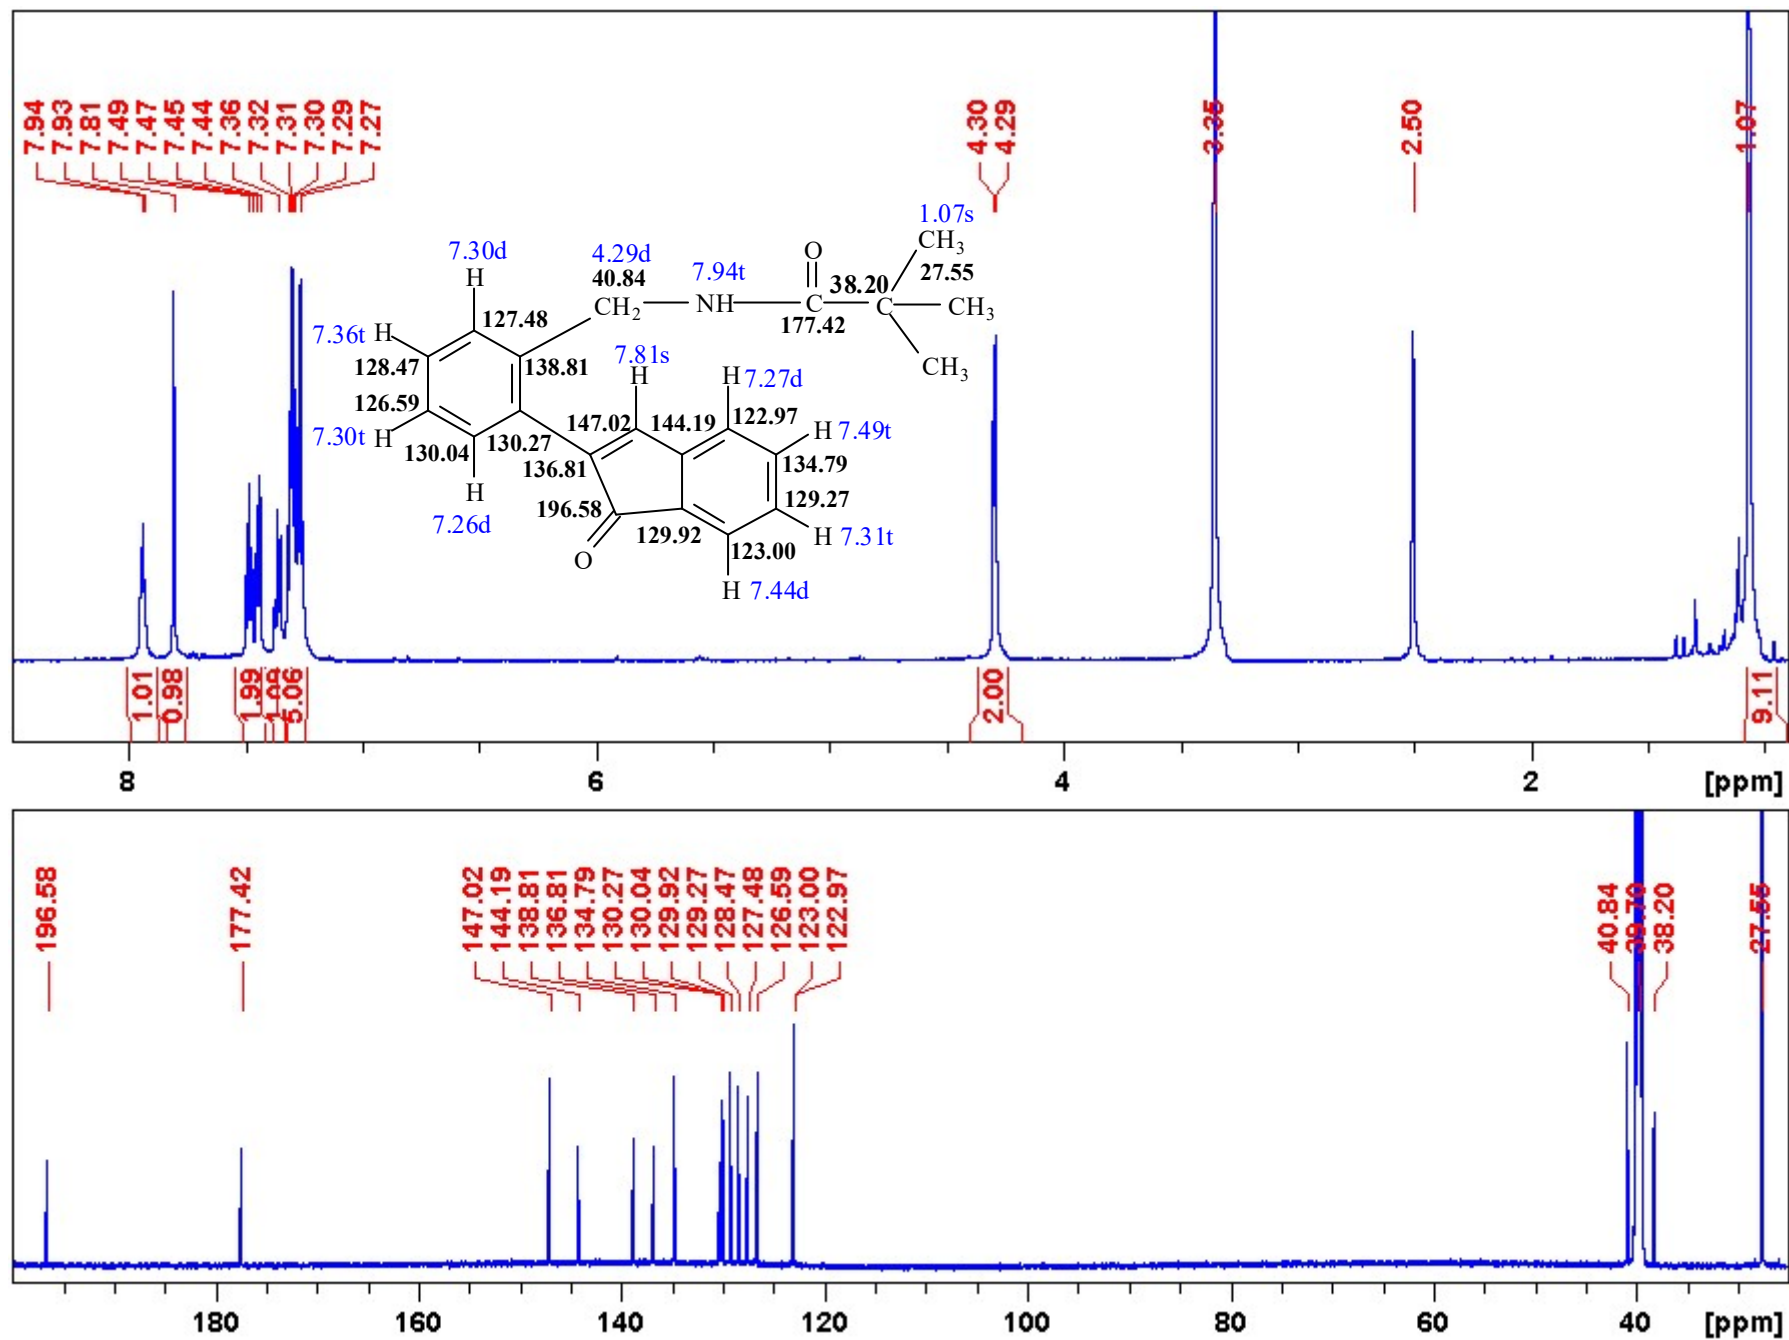



S25. Compound **15**,  $^1\text{H}$  NMR and sel-Tocsy on  $\delta$  7.49t and  $\delta$  7.36t signals

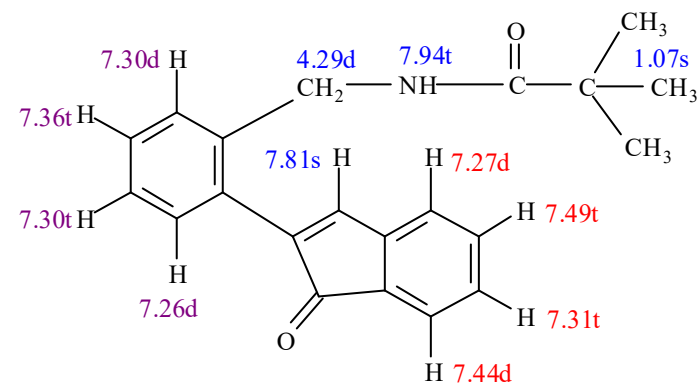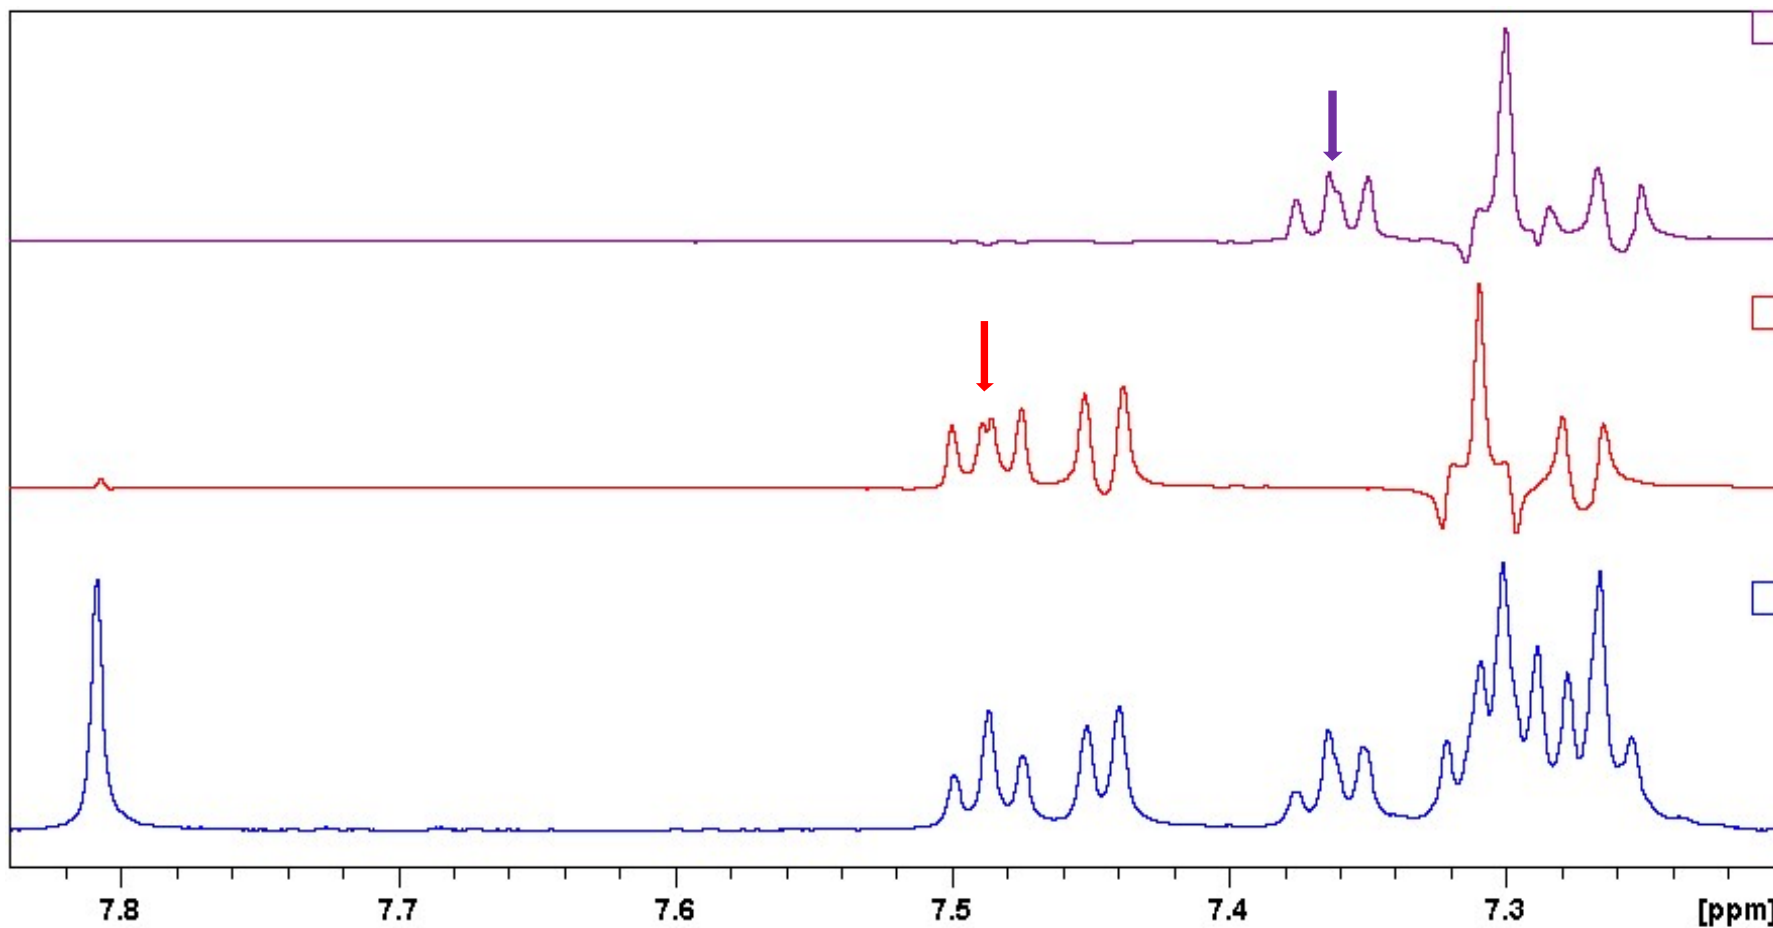

S26. Compound **15**, ROESY and section (8.0–7.2 ppm)

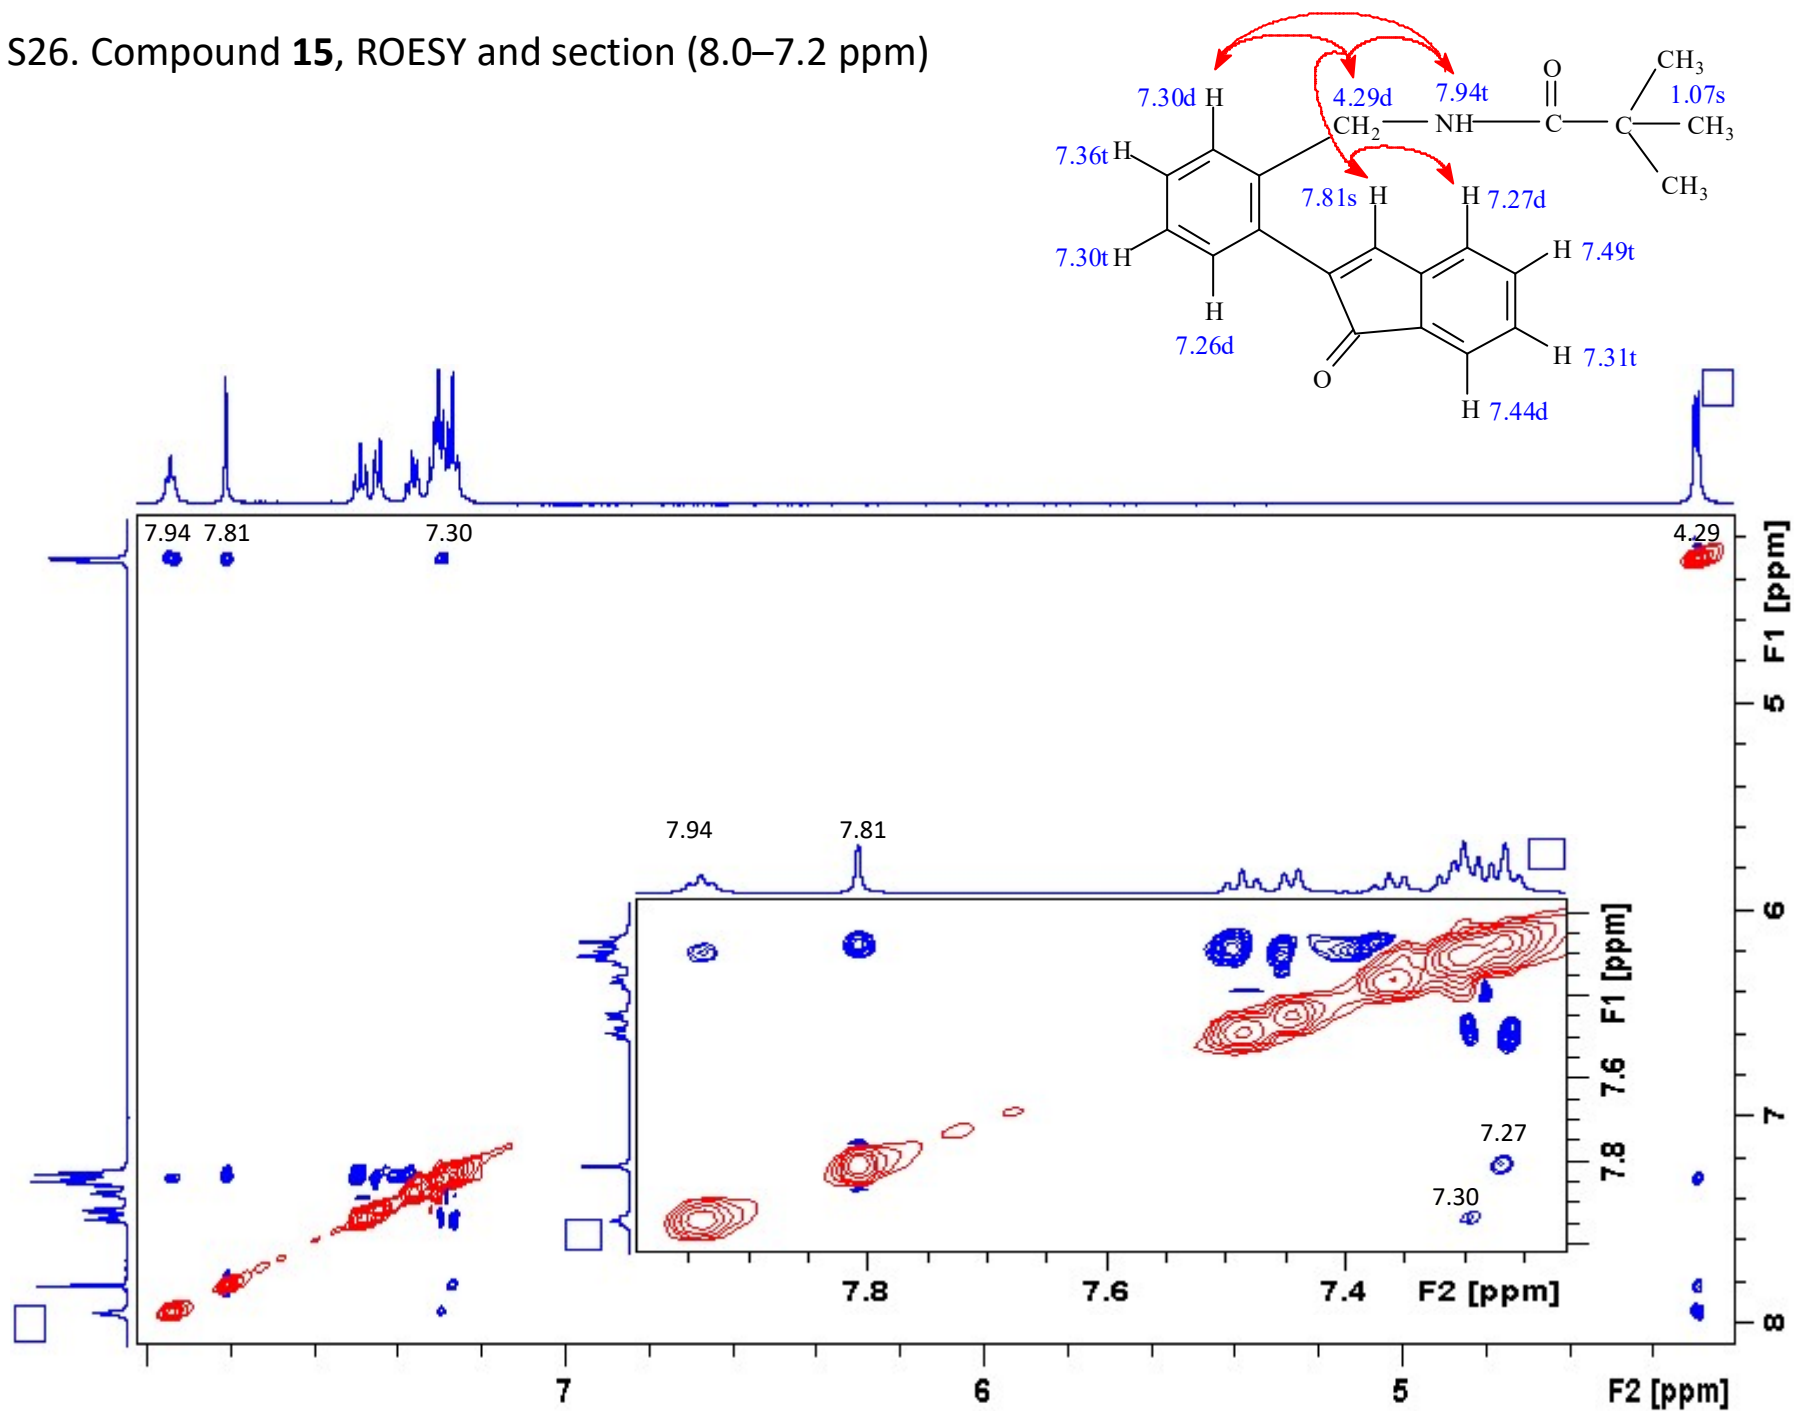

S27. Compound **15**, HSQC and Ar section with sel-Tocsy on  $\delta$  7.36

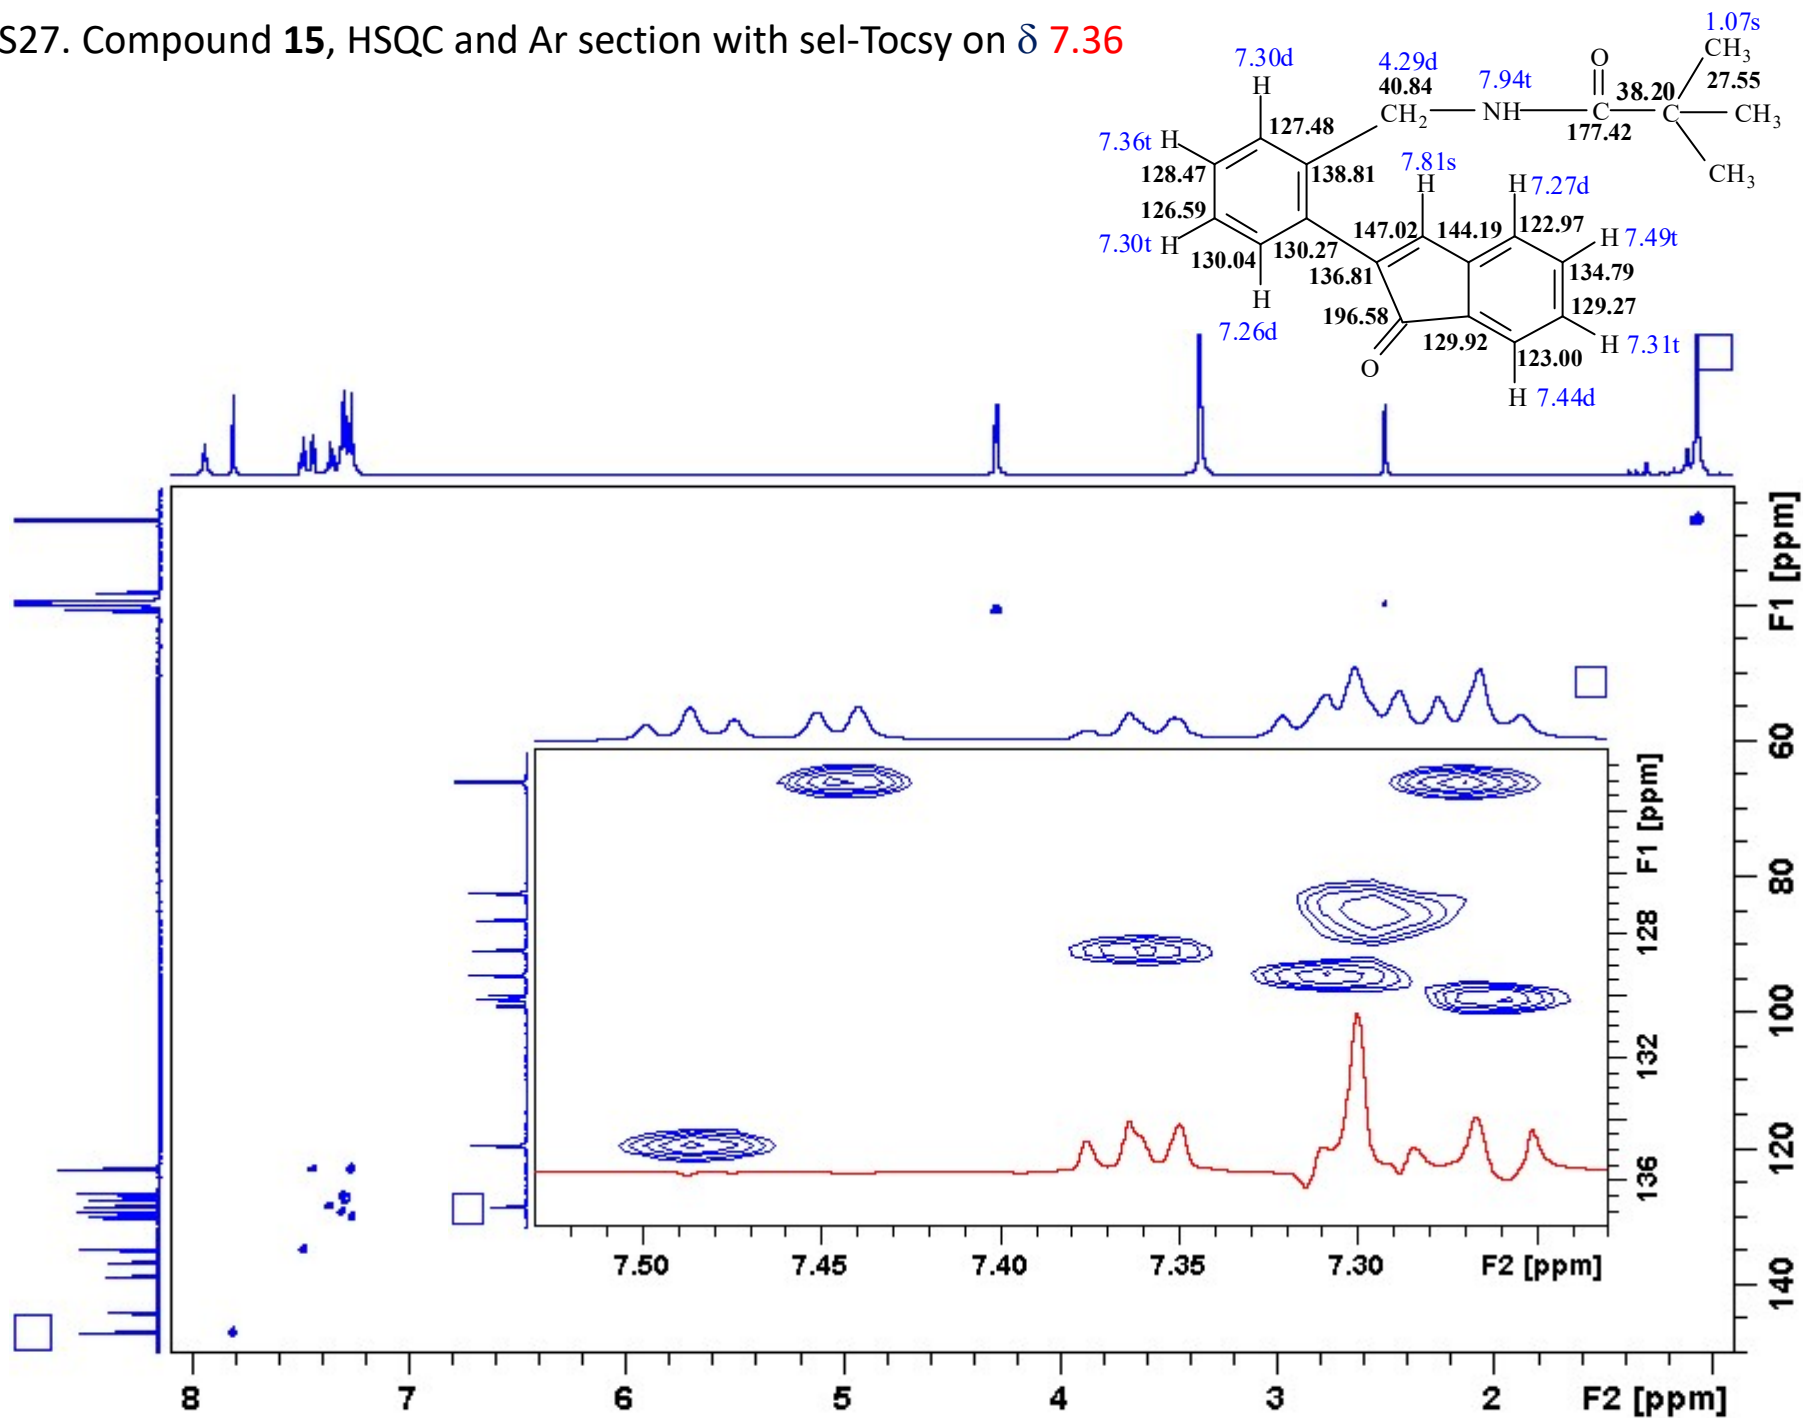

S28. Compound **15**, HMBC

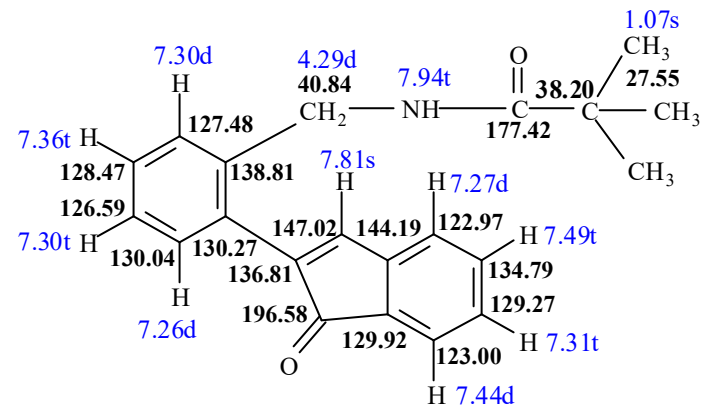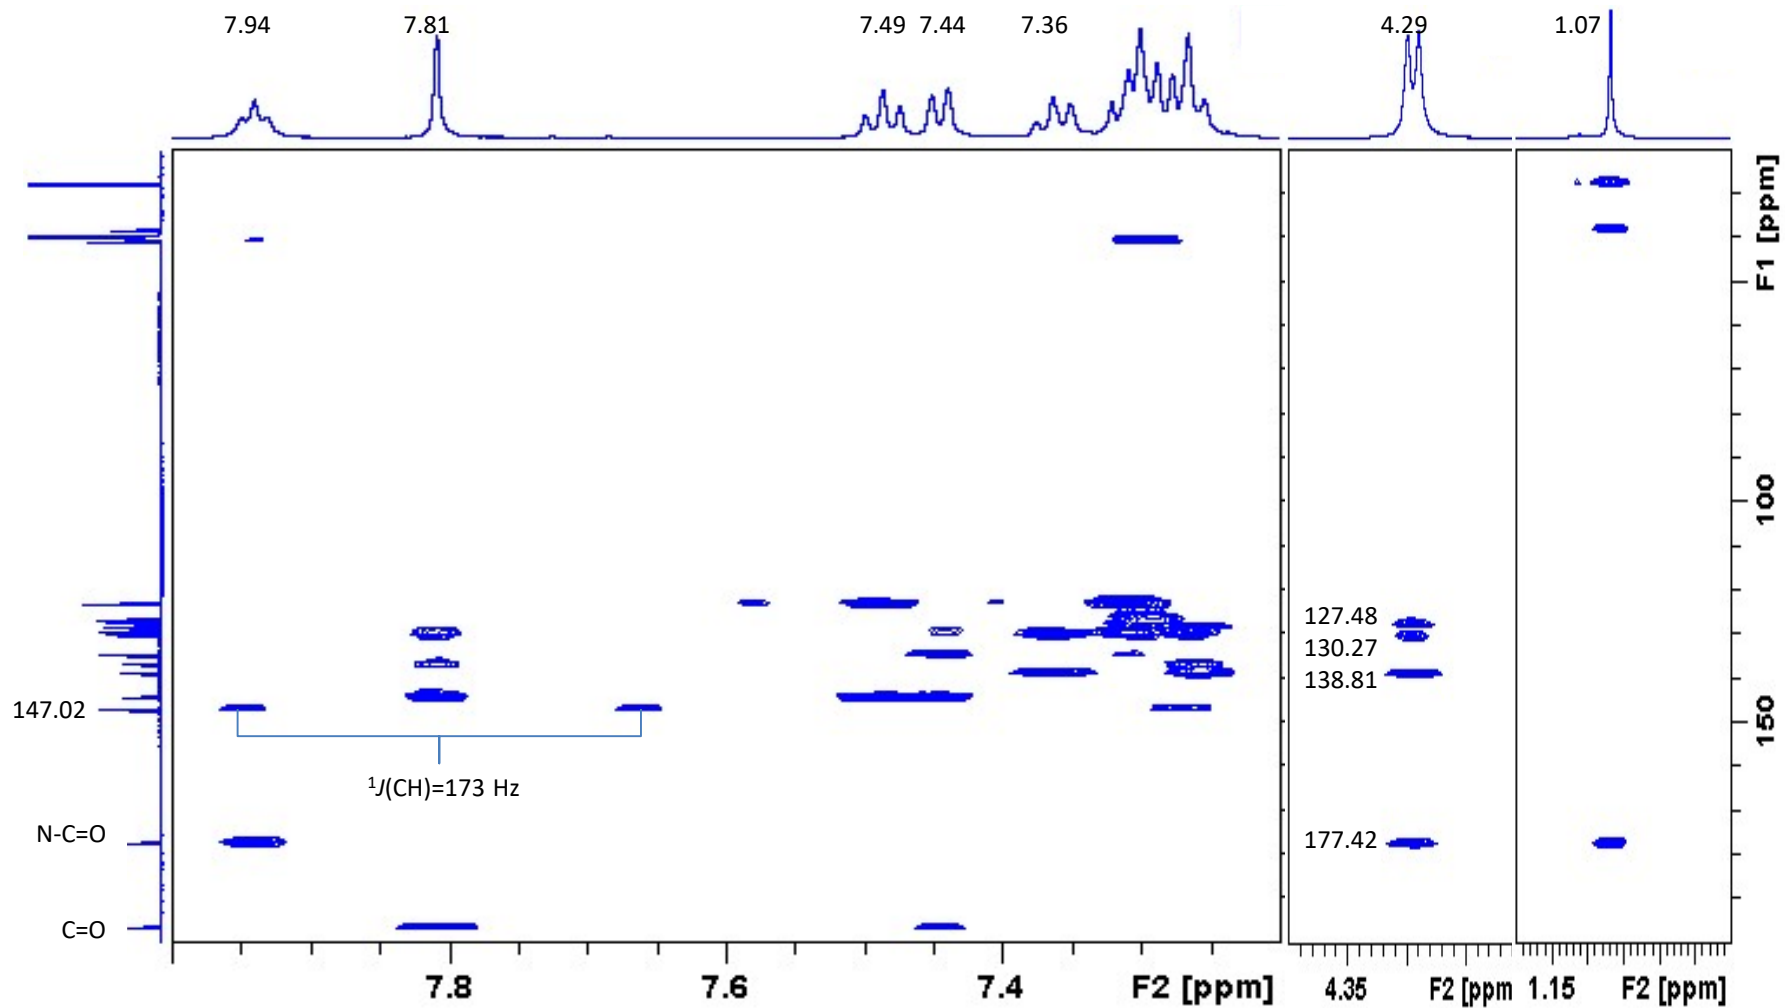

S29. Compound **15**, selective HMBC (148–121 ppm)

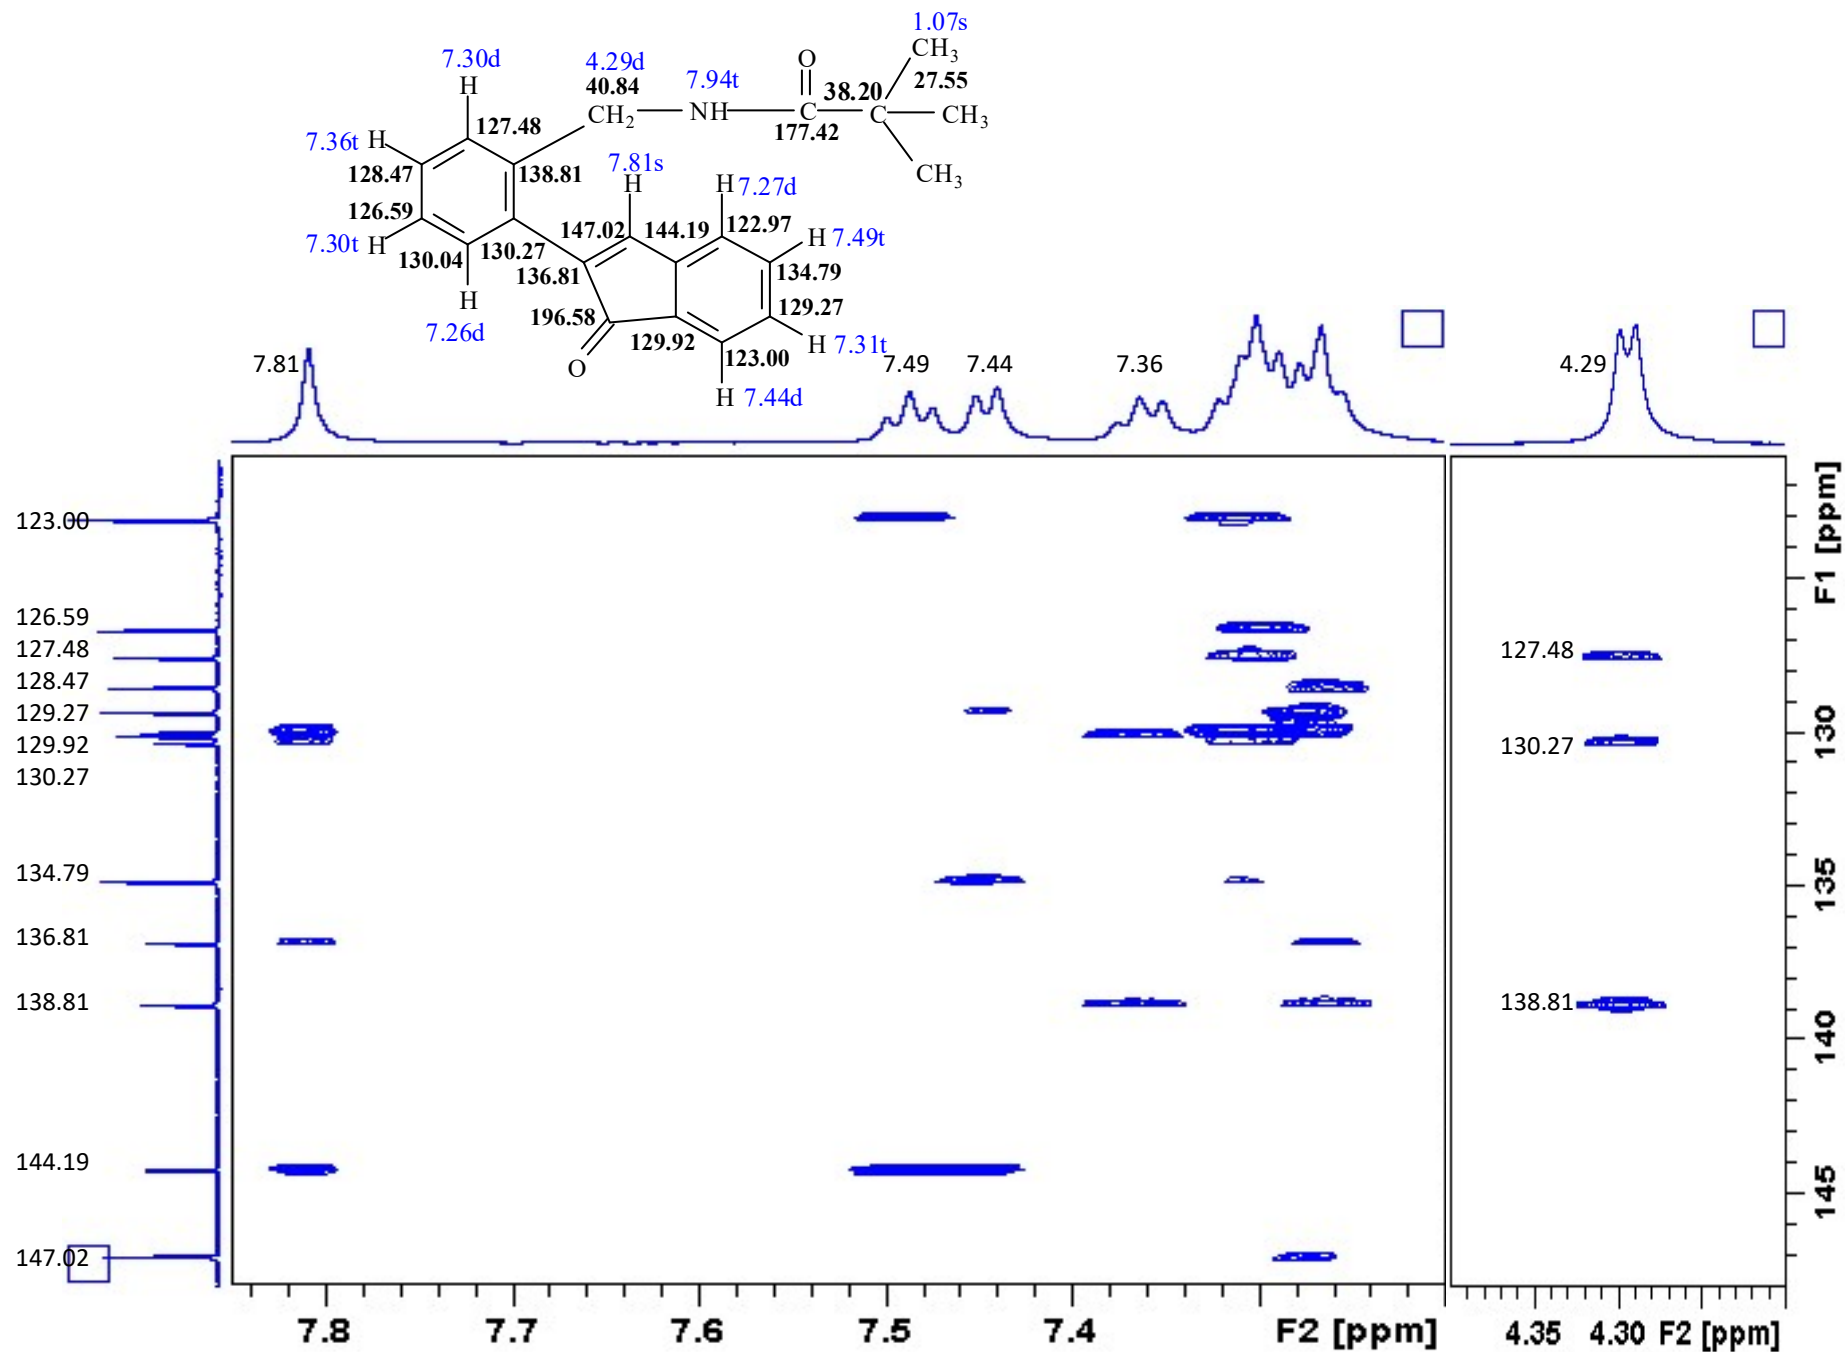

S30. Monitoring of the composition of the reaction mixture by LC-MS during the  $\text{BF}_3 \cdot \text{H}_2\text{O}$ -catalyzed transformation of **5** (Scheme 4)

| Reaction time [h] | <b>5</b> [%]   | <b>15</b> [%]  | M=520 g/mol (unidentified structure) | <b>14</b> [%]                             | <b>6a</b> [%]                 | M=520 g/mol (unidentified structure) | M=622 g/mol (unidentified structure) |
|-------------------|----------------|----------------|--------------------------------------|-------------------------------------------|-------------------------------|--------------------------------------|--------------------------------------|
|                   | $R_t=2.99$ min | $R_t=3.94$ min | $R_t=4.05$ min                       | " $\text{BF}_3$ -dimer"<br>$R_t=4.17$ min | "TFA dimer"<br>$R_t=4.23$ min | $R_t=4.47$ min                       | $R_t=4.94$ min                       |
| 3.5               | 9.0            | <0.3           | 10.0                                 | 11.0                                      | 37.0                          | 14.0                                 | 1.0                                  |
| 6.5               | 4.0            | 5.0            | 10.0                                 | 22.0                                      | 24.0                          | 15.0                                 | 1.0                                  |
| 23.5              | <0.3           | 40.0           | 6.0                                  | 30.0                                      | <0.3                          | 11.0                                 | 1.0                                  |
| 25.0              | <0.3           | 44.0           | <0.3                                 | 32.0                                      | <0.3                          | 11.0                                 | 1.0                                  |

S31. Monitoring of the composition of the reaction mixture by LC-MS during the  $\text{BF}_3 \cdot \text{H}_2\text{O}$ -catalyzed transformation of **6a** (Scheme 9)

| Reaction time<br>[h] | 5 [%]          | 15 [%]         | M=520 g/mol<br>(unidentified<br>structure) | 14 [%]                                    | 6a [%]                        | M=520 g/mol<br>(unidentified<br>structure) | M=720 g/mol<br>(unidentified<br>structure) |
|----------------------|----------------|----------------|--------------------------------------------|-------------------------------------------|-------------------------------|--------------------------------------------|--------------------------------------------|
|                      | $R_t=2.98$ min | $R_t=3.94$ min | $R_t=4.05$ min                             | " $\text{BF}_3$ -dimer"<br>$R_t=4.16$ min | "TFA-dimer"<br>$R_t=4.23$ min | $R_t=4.46$ min                             | $R_t=5.04$ min                             |
| 3.5                  | 2.0            | <0.3           | 5.0                                        | 11.0                                      | 53.0                          | 7.0                                        | 2.0                                        |
| 6.5                  | 2.0            | <0.3           | 5.0                                        | 15.0                                      | 45.0                          | 3.0                                        | 3.0                                        |
| 23.5                 | 2.0            | 2.6            | 5.0                                        | 35.0                                      | 22.0                          | 1.0                                        | 4.0                                        |
| 27.5                 | 2.0            | 9.0            | 6.0                                        | 41.0                                      | 13.0                          | 11.0                                       | 3.0                                        |
| 32.0                 | 1.0            | 9.0            | 4.5                                        | 44.0                                      | 7.0                           | 10.0                                       | 4.0                                        |
| 47.0                 | <0.3           | 17.0           | 5.0                                        | 46.0                                      | 2.0                           | 9.0                                        | 1.0                                        |

S33. Energy values obtained for the computation of the **11**→**18** transformation. The E, ZPE, U, H and G values were computed using the M062X/6-31+G (d,2p) method.

| ID                                   | E        | ZPE      | U        | H        | G        | S       | Imaginary frequencies |
|--------------------------------------|----------|----------|----------|----------|----------|---------|-----------------------|
| 11A                                  | -1795.04 | -1794.49 | -1794.45 | -1794.45 | -1794.55 | 221.704 |                       |
| TS1A                                 | -1795.00 | -1794.45 | -1794.42 | -1794.42 | -1794.52 | 214.197 | -1227.23              |
| 16+TFA                               | -1795.05 | -1794.50 | -1794.46 | -1794.46 | -1794.56 | 213.770 |                       |
| TS2A                                 | -1795.01 | -1794.47 | -1794.43 | -1794.43 | -1794.53 | 205.529 | -1372.28              |
| 17A                                  | -1795.03 | -1794.48 | -1794.44 | -1794.44 | -1794.54 | 220.323 |                       |
| 17A--H <sub>2</sub> O                | -1871.44 | -1870.87 | -1870.83 | -1870.83 | -1870.94 | 231.422 |                       |
| TS3A                                 | -1871.44 | -1870.86 | -1870.82 | -1870.82 | -1870.93 | 221.810 | -196.35               |
| 18+TFA                               | -1871.48 | -1870.90 | -1870.86 | -1870.86 | -1870.97 | 219.313 |                       |
| 11B                                  | -1669.31 | -1668.76 | -1668.73 | -1668.73 | -1668.83 | 208.850 |                       |
| TS1B                                 | -1669.30 | -1668.75 | -1668.72 | -1668.72 | -1668.81 | 196.250 | -1274.25              |
| 16+BF <sub>3</sub> ·H <sub>2</sub> O | -1669.32 | -1668.77 | -1668.74 | -1668.74 | -1668.83 | 206.840 |                       |
| TS2B                                 | -1669.28 | -1668.74 | -1668.71 | -1668.71 | -1668.81 | 209.162 | -1157.79              |
| 17B                                  | -1669.30 | -1668.75 | -1668.71 | -1668.71 | -1668.82 | 222.012 |                       |
| 17B--H <sub>2</sub> O                | -1745.73 | -1745.15 | -1745.11 | -1745.11 | -1745.22 | 220.838 |                       |
| TS3B                                 | -1745.72 | -1745.14 | -1745.11 | -1745.10 | -1745.21 | 215.080 | -209.32               |
| 18+BF <sub>3</sub> ·H <sub>2</sub> O | -1745.76 | -1745.18 | -1745.14 | -1745.14 | -1745.24 | 217.278 |                       |
| H <sub>2</sub> O                     | -76.4053 | -76.3840 | -76.3812 | -76.3802 | -76.4017 | 45.111  |                       |
